# Supplementary material for: Cu-catalyzed [2 + 2 + 1] cascade annulation of vinyl iodonium salts with elemental sulfur/selenium for the modular synthesis of thiophenes and selenophenes
Source: Royal Society of Chemistry journal article supplement (doi:10.1039/d1nj05433c), 2021-12-08

---

## Supporting Information

### **Cu-Catalyzed [2+2+1] Cascade Annulation of Vinyl Iodonium Salts with Element Sulfur/Selenium for the Modular Synthesis of Thiophenes and Selenophens**

Yaxing Wu,<sup>a</sup> Chao Wu,<sup>a</sup> Fei Wang,<sup>a</sup> and Chao Chen<sup>a,b,c\*</sup>

a. Key Laboratory of Bioorganic Phosphorus Chemistry & Chemical Biology (Ministry of Education),  
Department of Chemistry, Tsinghua University, Beijing 100084, China. Tel: +86-10-62773684. \* E-mail:  
chenchao01@mails.tsinghua.edu.cn.

b. School of Biotechnology and Health Sciences, Wuyi University & International Healthcare Innovation  
Institute (Jiangmen), Jiangmen, 529020, China.

c. State Key Laboratory of Elemento-Organic Chemistry, Nankai University, Tianjin 300071, China

#### **Table of the contents:**

|                                                                       |    |
|-----------------------------------------------------------------------|----|
| General Comments.....                                                 | 2  |
| Preparation of Starting Materials.....                                | 2  |
| General Synthesis of Thiophenes and Selenophens.....                  | 3  |
| Procedure for the Preparation of Compound <b>4</b> and <b>5</b> ..... | 4  |
| Characterization of Products .....                                    | 6  |
| X-Ray Crystal Structures.....                                         | 16 |
| References.....                                                       | 30 |
| <sup>1</sup> H, <sup>13</sup> C and <sup>19</sup> F NMR Spectra.....  | 31 |

## General Comments

All the reactions were carried out in pre-dried Schlenk tubes with a Teflon-lined septum under N<sub>2</sub> atmosphere. All of the solvents were fresh distilled. Column chromatography was performed on silica gel (particle size 10-40 μm, Ocean Chemical Factory of Qingdao, China). <sup>1</sup>H NMR and <sup>13</sup>C NMR spectra were recorded on a JEOL AL-400MHz spectrometer at ambient temperature with CDCl<sub>3</sub> as the solvent. Chemical shifts (δ) are reported in parts per million (ppm), referenced to the residual proton resonance of CDCl<sub>3</sub> (7.26 ppm), to the carbon resonance of CDCl<sub>3</sub> (77.16 ppm). Coupling constants (J) were given in Hertz (Hz). The term m, dq, q, t, d, s referred to multiplet, doublet quartet, quartet, triplet, doublet, singlet. Mass spectra were obtained using Bruker Esquire ion trap mass spectrometer in positive mode. The reaction progress was monitored by GC-MS and TLC. Unless otherwise noted, commercially available reagents were used as received.

## Preparation of Starting Materials<sup>1-4</sup>

### Synthesis of (*E*)-2-(aryl)ethenylboronic acid

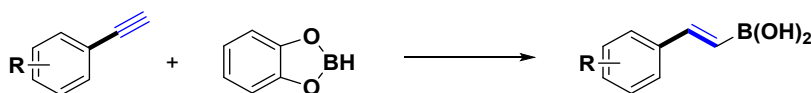

Terminal aromatic alkyne (3 mmol) was added to a solution of catechol borane (1 M in THF, 4.5 mL) and the mixture was stirred under nitrogen atmosphere at 75 °C for 16 h. The solution was cooled to room temperature and water (15 mL) was added. The precipitate was isolated by filtration and washed with water. The pure product was obtained by further purification through chromatography on silica.

### Synthesis of 2-methyl-(diacetoxyiodo)benzene

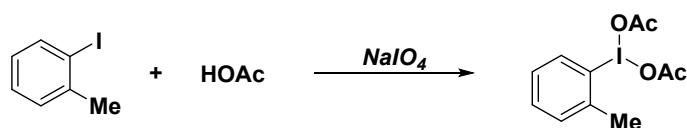

The NaIO<sub>4</sub> (30 mmol), 2-iodotoluene (10 mmol) and acetic acid (50 mL) were dissolved in a 250 mL round-bottom flask. Then Ac<sub>2</sub>O (5 mL) was added. The mixture was stirred at 100 °C for 24 h. After completion, water (50 mL) was added. The solid was separated by filtration. The filtrate was extracted with DCM (3 x 10 mL), dried over Na<sub>2</sub>SO<sub>4</sub>, then concentrated under reduced pressure. The combined crude products were purified by recrystallization from diethyl ether.

## Synthesis of aryl-vinyl iodonium triflate salts

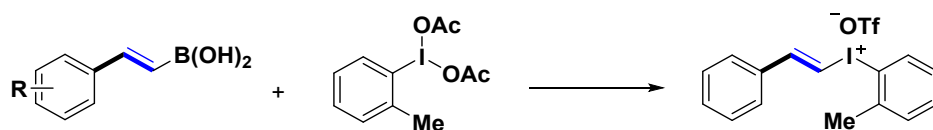

The boronic acid (2.0 mmol, 1 eq.) was suspended in dry  $\text{CH}_2\text{Cl}_2$  (10 mL) under nitrogen gas. The reaction was cooled to  $0^\circ\text{C}$  and  $\text{BF}_3 \cdot \text{Et}_2\text{O}$  (1.2 eq.) was added dropwise and stirred at  $0^\circ\text{C}$  for 15 minutes. Iodoarene diacetate (2.4 mmol, 1.2 eq.) was then added as a solution in  $\text{CH}_2\text{Cl}_2$  (10 mL) under nitrogen gas. The reaction mixture was stirred for an hour. Then Sodium trifluoromethanesulfonate (6.0 mmol, 3 eq.) added as a solution in water (10 mL). The reaction mixture was vigorously stirred for 15 minutes. The aqueous phase was extracted with  $\text{CH}_2\text{Cl}_2$  (3 x 20 mL) and the combined organic phases dried ( $\text{Na}_2\text{SO}_4$ ), filtered, then concentrated in vacuo. The crude residue was then recrystallized or stirred with  $\text{Et}_2\text{O}$  to obtain the desired compound as a white powder.

## General Synthesis of Thiophenes and Selenophens

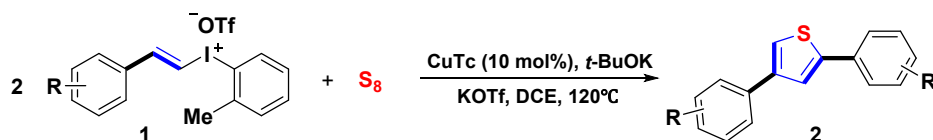

Under a  $\text{N}_2$  atmosphere, aryl-vinyl iodonium triflate salt **1** (0.2 mmol),  $\text{S}_8$  (0.08 mmol, 20.5 mg),  $t\text{-BuOK}$  (0.6 mmol, 67.4 mg),  $\text{KOTf}$  (0.4 mmol, 75.2 mg),  $\text{CuTc}$  (0.02 mmol, 3.8 mg) and dry DCE (2 mL) were added to a flame-dried Schlenk tube. The resulting mixture was stirred at  $120^\circ\text{C}$  for 24 hours, and water (5 mL) was added. The solution was extracted with ethyl acetate and organic layers were combined, dried over sodium sulfate. After evaporation of solvent, the residue was purified by column chromatography to give the corresponding products **2**.

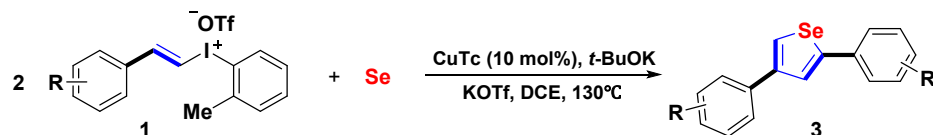

Under a  $\text{N}_2$  atmosphere, aryl-vinyl iodonium triflate salt **1** (0.2 mmol),  $\text{Se}$  (0.6 mmol, 47.4 mg),  $t\text{-BuOK}$  (0.6 mmol, 67.4 mg),  $\text{KOTf}$  (0.4 mmol, 75.2 mg),  $\text{CuTc}$  (0.02 mmol, 3.8 mg) and dry DCE (2 mL) were added to a flame-dried Schlenk tube. The resulting mixture was stirred at  $130^\circ\text{C}$  for 24 hours, and water (5 mL) was added. The solution was extracted with ethyl acetate and organic layers were combined, dried over sodium sulfate. After evaporation of solvent, the residue was purified by column chromatography to give the corresponding products **3**.

## Procedure for the Preparation of Compound 4 and 5

### Procedure 1 for preparation of 4 from 2a

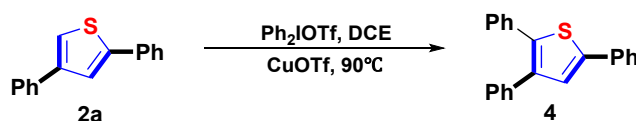

Under a  $\text{N}_2$  atmosphere, 2,4-diphenyl thiophene **2a** (0.2 mmol), diphenyliodonium salt (0.24 mmol, 103.2 mg),  $\text{CuOTf}$  (0.02 mmol, 4.3 mg) and dry DCE (2 mL) were added to a flame-dried Schlenk tube. The resulting mixture was stirred at  $90^\circ\text{C}$  for 8 hours, and water (5 mL) was added. The solution was extracted with ethyl acetate and organic layers were combined, dried over sodium sulfate. After evaporation of solvent, the residue was purified by column chromatography to give the corresponding products **4**.

### Procedure 2 for preparation of 5 from 2o

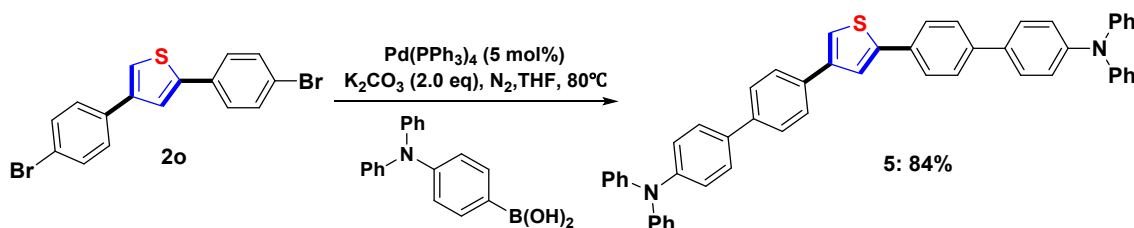

Under a  $\text{N}_2$  atmosphere, 2,4-bis(4-bromophenyl)thiophene **2o** (0.2 mmol), [4-(diphenylamino)phenyl]boronic acid (0.5 mmol, 144.5 mg),  $\text{K}_2\text{CO}_3$  (0.6 mmol, 82.9 mg),  $\text{Pd}(\text{PPh}_3)_4$  (0.01 mmol, 11.6 mg) and dry THF (2 mL) were added to a flame-dried Schlenk tube. The resulting mixture was stirred at  $80^\circ\text{C}$  for 4 hours, and water (10 mL) was added. The solution was extracted with ethyl acetate and organic layers were combined, dried over sodium sulfate. After evaporation of solvent, the residue was purified by column chromatography to give the corresponding products **5**.

---

**UV-vis absorption (Abs) and PL spectra of 5 in diluted solution (CH<sub>3</sub>CN) at room temperature<sup>5</sup>**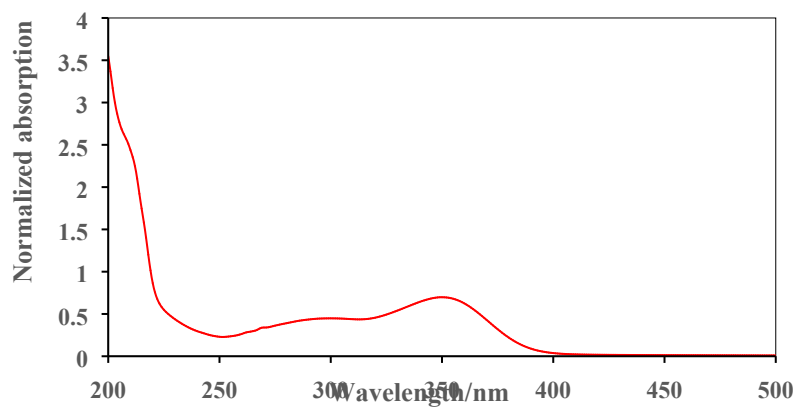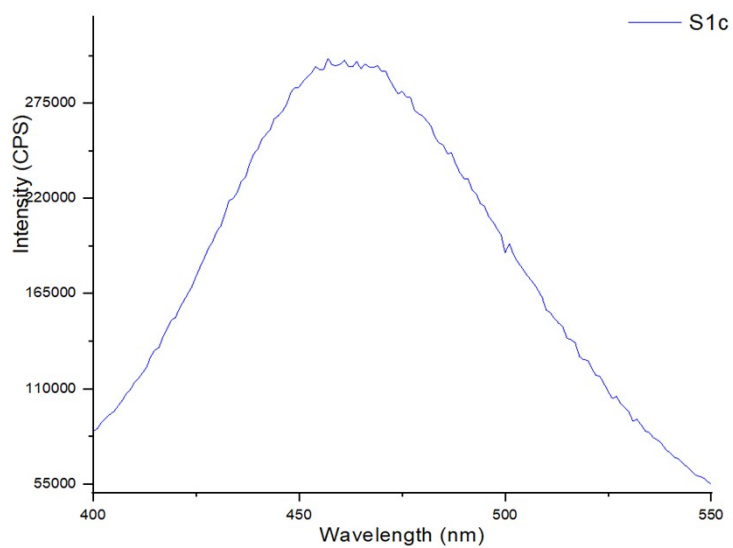

## Characterization of Products

### 2,4-Diphenylthiophene (2a)

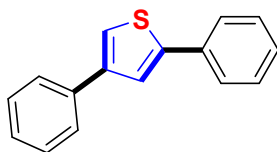

Prepared according to the general procedure as described above in 82% yield (38.7 mg). It was purified by flash chromatography (PE/EA 70:1) to afford a white solid. <sup>1</sup>H NMR (400 MHz, Chloroform-d)  $\delta$  7.68-7.56 (m, 5H), 7.44-7.37 (m, 5H), 7.33-7.28 (m, 2H). <sup>13</sup>C NMR (101 MHz, Chloroform-d)  $\delta$  145.30, 143.37, 136.08, 134.54, 129.30, 129.20, 127.97, 127.50, 126.56, 126.12, 122.53, 119.92. GC-MS: 236.

### 2,4-Di-*p*-tolylthiophene (2b)

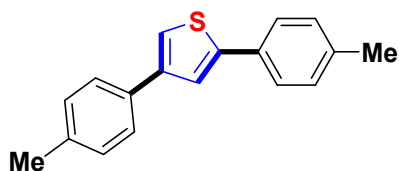

Prepared according to the general procedure as described above in 70% yield (37.0 mg). It was purified by flash chromatography (PE/EA 70:1) to afford a white solid. <sup>1</sup>H NMR (400 MHz, Chloroform-d)  $\delta$  7.52 (t, J = 8.5 Hz, 5H), 7.30 (s, 1H), 7.23-7.16 (m, 4H), 2.37 (s, 6H). <sup>13</sup>C NMR (101 MHz, CDCl<sub>3</sub>)  $\delta$  145.14, 143.12, 137.62, 137.06, 133.26, 131.73, 129.67, 129.58, 126.28, 125.85, 121.94, 118.70, 21.25. GC-MS: 264.

### 2,4-Di-*m*-tolylthiophene (2c)

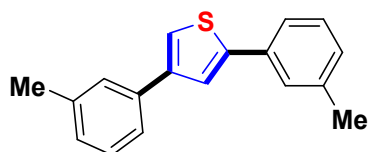

Prepared according to the general procedure as described above in 67% yield (35.4 mg). It was purified by flash chromatography (PE/EA 70:1) to afford a white solid. <sup>1</sup>H NMR (400 MHz, Chloroform-d)  $\delta$  7.58 (d, J = 1.5 Hz, 1H), 7.50-7.42 (m, 4H), 7.36 (d, J = 1.5 Hz, 1H), 7.34-7.26 (m, 2H), 7.13 (d, J = 7.5 Hz, 2H), 2.42 (s, 3H), 2.41 (s, 3H). <sup>13</sup>C NMR (101 MHz, Chloroform-d)  $\delta$  145.18, 143.28, 138.68, 138.51, 135.97, 134.40, 128.93, 128.83, 128.57, 128.12, 127.21, 126.67, 123.55, 123.11, 122.42, 119.57, 21.64, 21.57. GC-MS: 264.

**2,4-Di-*o*-tolylthiophene (2d)**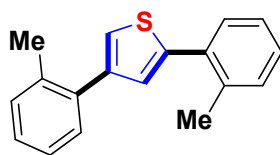

Prepared according to the general procedure as described above in 62% yield (32.7 mg). It was purified by flash chromatography (PE/EA 70:1) to afford a white solid. <sup>1</sup>H NMR (400 MHz, Chloroform-d) δ 7.45 (dd, J= 7.5 Hz, 1.5 Hz, 1H), 7.35 (dd, J= 7.5 Hz, 1.5 Hz, 1H), 7.32-7.23 (m, 6H), 7.20 (d, J = 1.5 Hz, 1H), 7.11 (d, J = 1.5 Hz, 1H), 2.47 (s, 3H), 2.41 (s, 3H). <sup>13</sup>C NMR (101 MHz, Chloroform-d) δ 142.72, 142.38, 136.87, 136.18, 135.81, 134.16, 130.96, 130.29, 130.19, 129.82, 128.49, 127.86, 127.50, 126.13, 125.91, 122.86, 21.35, 20.97. GC-MS: 264.

**2,4-Di-(3, 5-dimethylphenyl)-thiophene (2e)**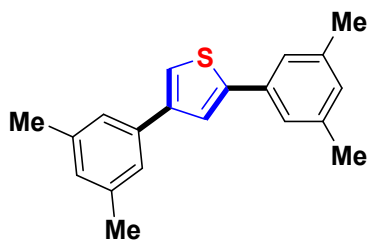

Prepared according to the general procedure as described above in 58% yield (33.9 mg). It was purified by flash chromatography (PE/EA 100:1) to afford a white solid. <sup>1</sup>H NMR (400 MHz, Chloroform-d) δ 7.56 (s, 1H), 7.34 (s, 1H), 7.29 (s, 2H), 7.26 (s, 2H), 6.96 (s, 2H), 2.38 (s, 12H). <sup>13</sup>C NMR (101 MHz, Chloroform-d) δ 145.19, 143.31, 138.55, 138.38, 135.98, 134.36, 129.46, 128.98, 124.34, 123.84, 122.39, 119.32, 21.49. GC-MS: 292.

**2,4-Di-(4-(tert-butylphenyl)-thiophene (2f)**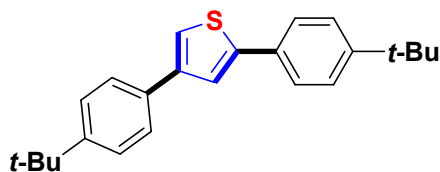

Prepared according to the general procedure as described above in 66% yield (45.9 mg). It was purified by flash chromatography (PE/EA 100:1) to afford a white solid. <sup>1</sup>H NMR (400 MHz, Chloroform-d) δ 7.62-7.53 (m, 5H), 7.47-7.39 (m, 4H), 7.32 (s, 1H), 1.36 (s, 18H). <sup>13</sup>C NMR (101 MHz, Chloroform-d) δ 150.87, 150.32, 145.00, 143.06, 133.32, 131.76, 126.13, 125.93, 125.82, 125.71, 122.08, 118.95, 34.66, 31.38. GC-MS: 348.

**2,4-Di-(2-methoxyphenyl)-thiophene (2g)**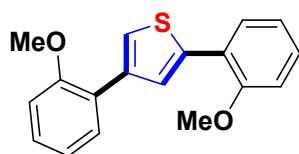

Prepared according to the general procedure as described above in 79% yield (46.8 mg). It was purified by flash chromatography (PE/EA 70:1) to afford a yellow solid. <sup>1</sup>H NMR (400 MHz, Chloroform-d)  $\delta$  7.83 (s, 1H), 7.70 (d,  $J = 7.5$  Hz, 1H), 7.61 (s, 1H), 7.55 (d,  $J = 7.5$  Hz, 1H), 7.32-7.23 (m, 2H), 7.06-6.99 (m, 4H), 3.95 (s, 3H), 3.89 (s, 3H). <sup>13</sup>C NMR (101 MHz, Chloroform-d)  $\delta$  156.68, 155.88, 138.50, 138.01, 129.84, 128.74, 128.47, 128.33, 127.16, 125.62, 125.58, 123.75, 121.06, 120.93, 111.78, 111.51, 55.81, 55.72. GC-MS: 296.

**2,4-Di-(4-trifluoromethoxyphenyl)-thiophene (2h)**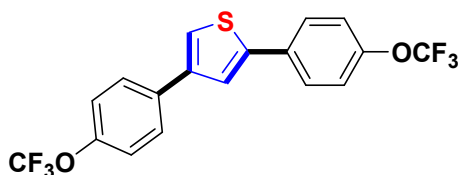

Prepared according to the general procedure as described above in 84% yield (46.8 mg). It was purified by flash chromatography (PE/EA 70:1) to afford a yellow solid. <sup>1</sup>H NMR (400 MHz, Chloroform-d)  $\delta$  7.62 (dd,  $J = 11.9$ , 8.7 Hz, 4H), 7.50 (s, 1H), 7.38 (s, 1H), 7.25 (m, 4H). <sup>13</sup>C NMR (101 MHz, Chloroform-d)  $\delta$  148.84 (q,  $J = 8.8$  Hz), 148.58 (q,  $J = 8.6$  Hz), 143.93, 141.97, 134.50, 132.99, 127.71, 127.28, 122.78, 121.58, 121.46, 120.77, 120.57 (q,  $J = 257$  Hz). <sup>19</sup>F NMR (565 MHz, Chloroform-d)  $\delta$  -50.97 (s, 3F), -60.20 (s, 3F). GC-MS: 404.

**2,4-Di-(2-fluorophenyl)-thiophene (2i)**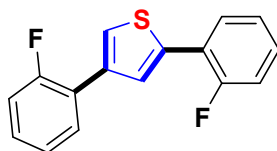

Prepared according to the general procedure as described above in 63% yield (34.3 mg). It was purified by flash chromatography (PE/EA 70:1) to afford a white solid. <sup>1</sup>H NMR (400 MHz, Chloroform-d)  $\delta$  7.80 (d,  $J = 1.4$  Hz, 1H), 7.68 (td,  $J = 7.9$ , 1.9 Hz, 1H), 7.65-7.57 (m, 2H), 7.33-7.23 (m, 2H), 7.22-7.12 (m, 4H). <sup>13</sup>C NMR (101 MHz, Chloroform-d)  $\delta$  159.93 (d,  $J = 247$  Hz), 159.23 (d,  $J = 249$  Hz), 136.28, 129.50 (d,  $J = 4.6$  Hz), 129.00 (d,  $J = 8.0$  Hz), 128.85-128.77 (m), 126.80 (q,  $J = 3.4$  Hz), 124.54 (dd,  $J = 11.2$  Hz, 3.4 Hz), 124.01 (m), 123.67 (d,



$J = 13.2$  Hz), 122.12 ( $J = 13.2$  Hz), 116.49 (d,  $J = 23.5$  Hz), 116.39 (d,  $J = 22.8$  Hz).  $^{19}\text{F}$  NMR (565 MHz, Chloroform- $d$ )  $\delta$  -108.32 (s, 1F), -108.42 (s, 1F). GC-MS: 272.

### 2,4-Di-(3,4,5-trifluorophenyl)-thiophene (2j)

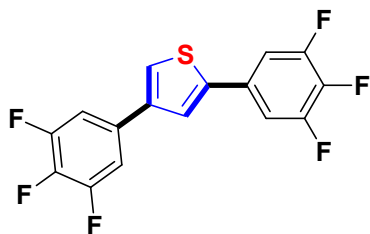

Prepared according to the general procedure as described above in 80% yield (55.0 mg). It was purified by flash chromatography (PE/EA 50:1) to afford a white solid.  $^1\text{H}$  NMR (400 MHz, Chloroform- $d$ )  $\delta$  7.39 (s, 2H), 7.26-7.14 (m, 4H).  $^{13}\text{C}$  NMR (101 MHz, Chloroform- $d$ )  $\delta$  153.09-152.51 (m), 150.50-150.25 (m), 142.71-142.52 (m), 140.57-140.37 (m), 131.49 (td,  $J = 6.8$  Hz, 2.3 Hz), 130.06 (td,  $J = 6.8$  Hz, 2.4 Hz), 123.02, 122.03, 110.56-110.00 (m).  $^{19}\text{F}$  NMR (565 MHz, Chloroform- $d$ )  $\delta$  -133.07 (dd,  $J = 20.5$ , 8.5 Hz, 2F), -133.56 (dd,  $J = 20.6$ , 8.5 Hz, 2F), -160.56 (dd,  $J = 33.7$ , 13.2 Hz, 1F), -161.53 (dd,  $J = 27.0$ , 14.1 Hz, 1F). GC-MS: 344. HRMS (ESI+) calcd for  $\text{C}_{16}\text{H}_6\text{F}_6\text{S}$  [ $\text{M} + \text{H}$ ] $^+$  345.0128. Found 345.0110. Melt point: 94.6-96.3°C

### 2,4-Di-(4-fluorophenyl)-thiophene (2k)

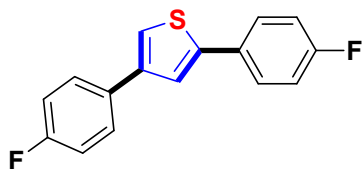

Prepared according to the general procedure as described above in 72% yield (39.2 mg). It was purified by flash chromatography (PE/EA 70:1) to afford a white solid.  $^1\text{H}$  NMR (400 MHz, Chloroform- $d$ )  $\delta$  7.63-7.52 (m, 4H), 7.44 (s, 1H), 7.30 (s, 1H), 7.09 (td,  $J = 8.8$ , 2.3 Hz, 4H).  $^{13}\text{C}$  NMR (101 MHz, Chloroform- $d$ )  $\delta$  162.58 (d,  $J = 245.3$  Hz), 162.54 (d,  $J = 245.1$  Hz), 144.28, 142.26, 132.12 (d,  $J = 8.0$  Hz), 130.65 (d,  $J = 7.8$  Hz), 127.98 (d,  $J = 8.0$  Hz), 127.65 ( $J = 8.0$  Hz), 122.36, 119.49, 116.10 (d,  $J = 35.6$  Hz), 115.82 (d,  $J = 35.2$  Hz).  $^{19}\text{F}$  NMR (565 MHz, Chloroform- $d$ )  $\delta$  -114.03 (s, 1F), -114.93 (s, 1F). GC-MS: 272.

### 2,4-Di-(3-fluorophenyl)-thiophene (2l)

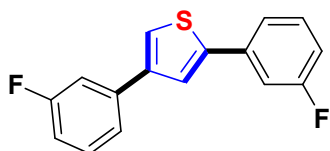

Prepared according to the general procedure as described above in 63% yield (34.3 mg). It was purified by flash chromatography (PE/EA 70:1) to afford a white solid.  $^1\text{H}$  NMR (400 MHz, Chloroform- $d$ )  $\delta$  7.55 (d,  $J$  = 1.5 Hz, 1H), 7.44-7.27 (m, 7H), 7.05-6.96 (m, 2H).  $^{13}\text{C}$  NMR (101 MHz, Chloroform- $d$ )  $\delta$  164.50 (d,  $J$  = 6.4 Hz), 162.06 (d,  $J$  = 6.8 Hz), 144.05, 142.07, 137.83 (d,  $J$  = 8.0 Hz), 136.29 (d,  $J$  = 8.0 Hz), 130.61 (d,  $J$  = 8.2 Hz), 130.47 (d,  $J$  = 8.4 Hz), 122.87, 122.04 (d,  $J$  = 3.0 Hz), 121.63 (d,  $J$  = 3.0 Hz), 121.09, 114.71 (d,  $J$  = 21.5 Hz), 114.28 (d,  $J$  = 21.2 Hz), 113.30 (d,  $J$  = 23.0 Hz), 112.81 (d,  $J$  = 23.0 Hz).  $^{19}\text{F}$  NMR (565 MHz, Chloroform- $d$ )  $\delta$  -112.48 (s, 1F), -112.74 (s, 1F). GC-MS: 272.

### 2,4-Di-(2-chlorophenyl)-thiophene (2m)

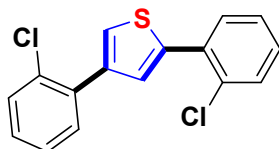

Prepared according to the general procedure as described above in 64% yield (38.9 mg). It was purified by flash chromatography (PE/EA 70:1) to afford a white solid.  $^1\text{H}$  NMR (400 MHz, Chloroform- $d$ )  $\delta$  7.62 (s, 1H), 7.59 (d,  $J$  = 7.5 Hz, 1H), 7.53-7.45 (m, 4H), 7.35-7.22 (m, 4H).  $^{13}\text{C}$  NMR (101 MHz, Chloroform- $d$ )  $\delta$  139.68, 139.45, 135.27, 133.06, 132.53, 132.45, 131.46, 131.19, 130.71, 130.38, 129.56, 128.89, 128.65, 127.11, 127.04, 125.00. GC-MS: 304.

### 2,4-Di-(3-chlorophenyl)-thiophene (2n)

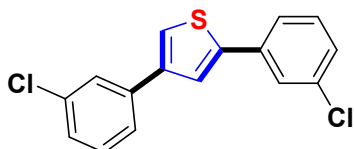

Prepared according to the general procedure as described above in 45% yield (27.4 mg). It was purified by flash chromatography (PE/EA 70:1) to afford a white solid.  $^1\text{H}$  NMR (400 MHz, Chloroform- $d$ )  $\delta$  7.60 (d,  $J$  = 13.6 Hz, 2H), 7.55-7.44 (m, 3H), 7.41 (s, 1H), 7.37-7.24 (m, 4H).  $^{13}\text{C}$  NMR (101 MHz, Chloroform- $d$ )  $\delta$  143.84, 141.88, 137.40, 135.89, 135.01, 134.88, 130.29, 130.19, 127.86, 127.47, 126.51, 125.91, 124.50, 124.06, 122.86, 121.21. GC-MS: 304.

**2,4-Di-(4-bromophenyl)-thiophene (2o)**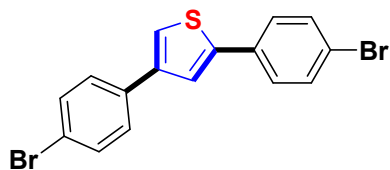

Prepared according to the general procedure as described above in 68% yield (53.6 mg). It was purified by flash chromatography (PE/EA 100:1) to afford a white solid. <sup>1</sup>H NMR (400 MHz, Chloroform-d)  $\delta$  7.55-7.44 (m, 9H), 7.38 (d,  $J$  = 1.5 Hz, 1H). <sup>13</sup>C NMR (101 MHz, Chloroform-d)  $\delta$  144.21, 142.17, 134.64, 133.16, 132.16, 132.06, 127.94, 127.41, 122.46, 121.81, 121.41, 120.46. GC-MS: 394.

**2,4-Di-(2-bromophenyl)-thiophene (2p)**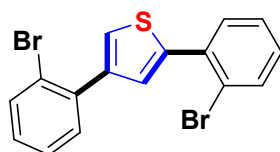

Prepared according to the general procedure as described above in 60% yield (47.3 mg). It was purified by flash chromatography (PE/EA 70:1) to afford a yellow solid. <sup>1</sup>H NMR (400 MHz, Chloroform-d)  $\delta$  7.68 (t,  $J$  = 8.0 Hz, 2H), 7.58-7.50 (m, 2H), 7.48-7.43 (m, 2H), 7.38-7.30 (m, 2H), 7.18 (t,  $J$  = 7.7 Hz, 2H). <sup>13</sup>C NMR (101 MHz, Chloroform-d)  $\delta$  141.14, 141.01, 137.45, 135.15, 133.89, 133.53, 131.99, 131.38, 129.73, 129.23, 128.90, 127.59, 127.56, 124.69, 122.88, 122.61. GC-MS: 394.

**2,4-Di-(3-trifluoromethylphenyl)-thiophene (2q)**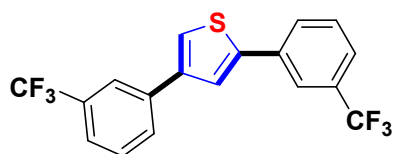

Prepared according to the general procedure as described above in 74% yield (55.1 mg). It was purified by flash chromatography (PE/EA 50:1) to afford a yellow solid. <sup>1</sup>H NMR (400 MHz, Chloroform-d)  $\delta$  7.87 (d,  $J$  = 10.9 Hz, 2H), 7.81 (t,  $J$  = 7.3 Hz, 2H), 7.64 (s, 1H), 7.60-7.49 (m, 5H). <sup>13</sup>C NMR (101 MHz, Chloroform-d)  $\delta$  144.00, 141.99, 136.33, 134.89, 129.63, 129.49, 129.15, 124.55-124.47 (m), 124.19-124.13 (m), 123.18-123.09 (m), 122.63, 122.57, 121.73, 121.66. <sup>19</sup>F NMR (565 MHz, Chloroform-d)  $\delta$  -62.57 (s, 3F), -62.67 (s, 3F). GC-MS: 372. HRMS (ESI+) calcd for C<sub>18</sub>H<sub>10</sub>F<sub>6</sub>S [M + H]<sup>+</sup> 373.0409. Found 373.0401. Melt point: 84.7-85.9°C

**2,4-Di-(4-trifluoromethylphenyl)-thiophene (2r)**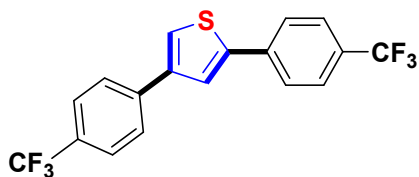

Prepared according to the general procedure as described above in 80% yield (59.5 mg). It was purified by flash chromatography (PE/EA 50:1) to afford a white solid.  $^1\text{H}$  NMR (400 MHz, Chloroform- $d$ )  $\delta$  7.78-7.69 (m, 5H), 7.69-7.64 (m, 6H), 7.54 (s, 1H).  $^{13}\text{C}$  NMR (101 MHz, Chloroform- $d$ )  $\delta$  142.65, 142.20, 138.09, 137.49, 130.62 (d,  $J = 3.0$  Hz), 130.29 (d,  $J = 3.0$  Hz), 130.12, 127.52, 124.01-124.34 (m), 123.91, 121.59.  $^{19}\text{F}$  NMR (565 MHz, Chloroform- $d$ )  $\delta$  -62.38 (s, 3F), -62.47 (s, 3F). GC-MS: 372.

**2,4-Di-(naphthalen-1-yl)-thiophene (2s)**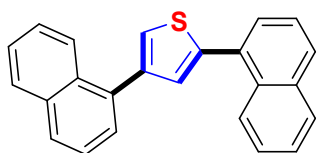

Prepared according to the general procedure as described above in 44% yield (29.6 mg). It was purified by flash chromatography (PE/EA 100:1) to afford a brown solid.  $^1\text{H}$  NMR (400 MHz, Chloroform- $d$ )  $\delta$  8.38 (dt,  $J = 7.0$ , 3.4 Hz, 1H), 8.26-8.19 (m, 1H), 7.96-7.84 (m, 4H), 7.69 (dd,  $J = 7.1$ , 1.3 Hz, 1H), 7.61 (dd,  $J = 7.1$ , 1.3 Hz, 1H), 7.58-7.46 (m, 8H).  $^{13}\text{C}$  NMR (101 MHz, Chloroform- $d$ )  $\delta$  141.84, 141.45, 135.11, 134.03, 133.99, 132.45, 131.85, 129.99, 128.67, 128.51, 128.49, 128.33, 127.98, 127.11, 126.68, 126.35, 126.19, 126.01, 125.97, 125.82, 125.56, 125.42, 123.94, 123.84. GC-MS: 336. HRMS (ESI $^+$ ) calcd for  $\text{C}_{24}\text{H}_{16}\text{S}$  [ $\text{M} + \text{H}$ ] $^+$  337.0979. Found 337.0986. Melt point: 84.2-85.7°C.

**2,4-Di-(benzofuran-2-yl)-thiophene (2t)**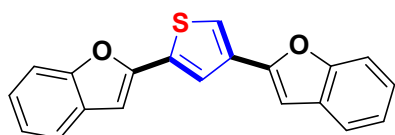

Prepared according to the general procedure as described above in 50% yield (31.6 mg). It was purified by flash chromatography (PE/EA 100:1) to afford a white solid.  $^1\text{H}$  NMR (400 MHz, Chloroform- $d$ )  $\delta$  7.57-7.53 (m, 2H), 7.50-7.46 (m, 2H), 7.38-7.35 (m, 2H), 7.32-7.19 (m, 4H), 6.87 (s, 2H).  $^{13}\text{C}$  NMR (101 MHz, Chloroform- $d$ )  $\delta$

154.71, 153.83, 149.87, 148.85, 134.48, 129.08, 128.86, 126.88, 126.33, 125.33, 124.97, 123.44, 122.80, 122.30, 121.14, 111.28, 110.81, 110.17, 103.36, 102.10. GC-MS: 316. HRMS (ESI+) calcd for C<sub>20</sub>H<sub>12</sub>O<sub>2</sub>S [M + H]<sup>+</sup> 317.0592. Found 317.0578. Melt point: 94.6-95.7°C.

### 2,4-Diphenylselenophen (3a)

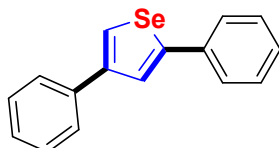

Prepared according to the general procedure as described above in 37% yield (21.0 mg). It was purified by flash chromatography (PE/EA 100:1) to afford a white solid. <sup>1</sup>H NMR (400 MHz, Chloroform-d) δ 7.71-7.59 (m, 5H), 7.45-7.36 (m, 5H), 7.34-7.29 (m, 2H). <sup>13</sup>C NMR (101 MHz, Chloroform-d) δ 144.14, 143.22, 136.74, 133.98, 128.75, 128.65, 127.78, 127.50, 126.75, 125.86, 121.55, 120.28. GC-MS: 284. HRMS (ESI+) calcd for C<sub>16</sub>H<sub>12</sub>Se [M + H]<sup>+</sup> 285.1104. Found 285.1113. Melt point: 101.6-103.1°C.

### 2,4-Di-*p*-tolylselenophen (3b)

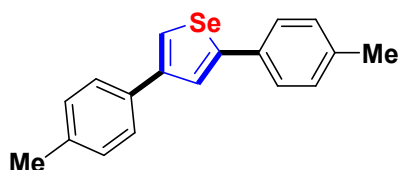

Prepared according to the general procedure as described above in 42% yield (26.2 mg). It was purified by flash chromatography (PE/EA 100:1) to afford a white solid. <sup>1</sup>H NMR (400 MHz, Chloroform-d) δ 7.49 (t, J = 8.5 Hz, 5H), 7.31 (s, 1H), 7.23-7.16 (m, 4H), 2.24 (s, 6H). <sup>13</sup>C NMR (101 MHz, CDCl<sub>3</sub>) δ 144.79, 143.33, 137.22, 136.70, 133.11, 131.90, 129.03, 128.94, 126.10, 125.85, 121.94, 117.72, 18.90. GC-MS: 312. HRMS (ESI+) calcd for C<sub>18</sub>H<sub>16</sub>Se [M + H]<sup>+</sup> 313.1418. Found 313.1416. Melt point: 106.6-107.9°C.

### 2,4-Di-(4-(*tert*-butylphenyl)-selenophen (3c)

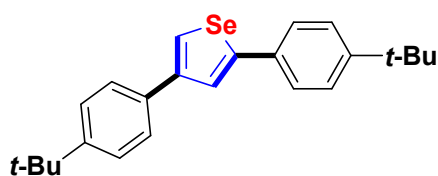

Prepared according to the general procedure as described above in 31% yield (24.6 mg). It was purified by flash

chromatography (PE/EA 100:1) to afford a yellow solid.  $^1\text{H}$  NMR (400 MHz, Chloroform- $d$ )  $\delta$  7.65-7.55 (m, 5H), 7.45-7.37 (m, 4H), 7.32 (s, 1H), 1.33-1.28 (m, 18H).  $^{13}\text{C}$  NMR (101 MHz, Chloroform- $d$ )  $\delta$  150.58, 150.42, 144.07, 142.97, 133.71, 129.98, 125.43, 125.23, 125.12, 125.00, 120.59, 119.27, 34.22, 30.00. GC-MS: 396. HRMS (ESI $^+$ ) calcd for  $\text{C}_{24}\text{H}_{28}\text{Se}$   $[\text{M} + \text{H}]^+$  397.1356. Found 397.1351. Melt point: 97.6-98.4 $^\circ\text{C}$

### 2,4-Di-(2-methoxyphenyl)-selenophen (3d)

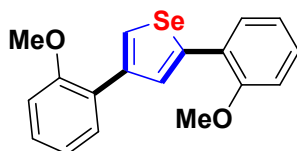

Prepared according to the general procedure as described above in 32% yield (22.0 mg). It was purified by flash chromatography (PE/EA 70:1) to afford a brown solid.  $^1\text{H}$  NMR (400 MHz, Chloroform- $d$ )  $\delta$  7.82 (dd,  $J$ = 7.5 Hz, 1.5 Hz, 1H), 7.45 (dd,  $J$ = 7.5 Hz, 1.5 Hz, 1H), 7.41-7.33 (m, 6H), 7.30 (d,  $J$  = 1.5 Hz, 1H), 7.21 (d,  $J$  = 1.5 Hz, 1H), 3.93 (s, 3H), 3.88 (s, 3H).  $^{13}\text{C}$  NMR (101 MHz, Chloroform- $d$ )  $\delta$  155.18, 154.38, 139.80, 139.31, 131.76, 128.44, 128.16, 128.03, 127.17, 125.62, 123.75, 123.67, 119.62, 119.50, 113.65, 113.37, 52.24, 52.15. GC-MS: 344. HRMS (ESI $^+$ ) calcd for  $\text{C}_{18}\text{H}_{16}\text{O}_2\text{Se}$   $[\text{M} + \text{H}]^+$  345.0316. Found 345.0312. Melt point: 109.6-111.1 $^\circ\text{C}$ .

### 2,4-Di-(4-trifluoromethylphenyl)-selenophen (3e)

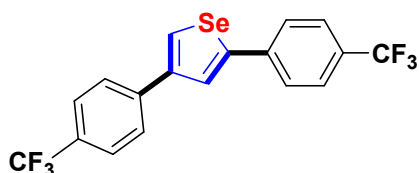

Prepared according to the general procedure as described above in 20% yield (16.8 mg). It was purified by flash chromatography (PE/EA 70:1) to afford a white solid.  $^1\text{H}$  NMR (400 MHz, Chloroform- $d$ )  $\delta$  7.83-7.67 (m, 11H), 7.36 (s, 1H).  $^{13}\text{C}$  NMR (101 MHz,  $\text{CDCl}_3$ ).  $^{13}\text{C}$  NMR (101 MHz, Chloroform- $d$ )  $\delta$  142.16, 141.70, 137.65, 137.05, 131.27 (d,  $J$  = 3.0 Hz), 130.95 (d,  $J$  = 3.0 Hz), 130.12, 127.52, 124.90-124.52 (m), 123.91, 121.59.  $^{19}\text{F}$  NMR (565 MHz, Chloroform- $d$ )  $\delta$  -61.35 (s, 3F), -61.59 (s, 3F). GC-MS: 420. HRMS (ESI $^+$ ) calcd for  $\text{C}_{18}\text{H}_{10}\text{F}_6\text{Se}$   $[\text{M} + \text{H}]^+$  420.9852. Found 420.9863. Melt point: 118.3-119.8 $^\circ\text{C}$ .

### 2,3,5-triphenylthiophene (4)

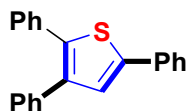

Prepared according to the general procedure as described above in 91% yield (56.8 mg). It was purified by flash chromatography (PE/EA 100:1) to afford a white solid.  $^1\text{H}$  NMR (400 MHz, Chloroform- $d$ )  $\delta$  7.65 (dd,  $J = 8.2, 1.3$  Hz, 2H), 7.45-7.22 (m, 14H).  $^{13}\text{C}$  NMR (101 MHz, Chloroform- $d$ )  $\delta$  142.67, 139.10, 138.10, 136.70, 134.32, 134.21, 129.25, 129.18, 129.05, 128.57, 128.51, 127.72, 127.54, 127.11, 126.61, 125.71. GC-MS: 312.

### 2,4-Di-(4-(4-diphenylaminophenyl)-phenyl)-thiophene (5)

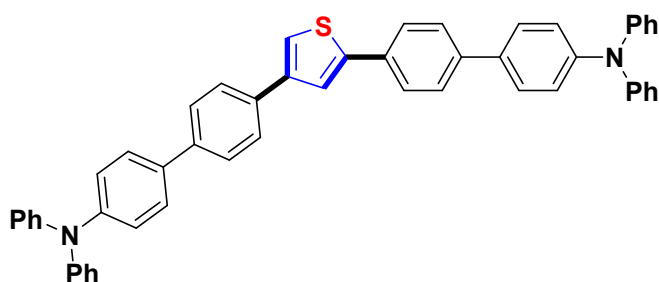

Prepared according to the general procedure as described above in 84% yield (121.5 mg). It was purified by flash chromatography (PE/EA 70:1) to afford a white solid.  $^1\text{H}$  NMR (400 MHz, Chloroform- $d$ )  $\delta$  7.70 (t,  $J = 8.4$  Hz, 4H), 7.66-7.59 (m, 4H), 7.51 (dd,  $J = 8.7, 2.8$  Hz, 4H), 7.46-7.40 (m, 2H), 7.31-7.27 (m, 6H), 7.17-7.12 (m, 13H), 7.06-7.00 (m, 5H).  $^{13}\text{C}$  NMR (101 MHz, Chloroform- $d$ )  $\delta$  147.75, 147.72, 147.38, 142.89, 139.58, 134.56, 134.40, 132.89, 129.40, 129.34, 127.67, 127.63, 127.39, 127.11, 127.07, 126.75, 126.27, 124.61, 124.56, 124.39, 124.17, 123.97, 123.90, 123.13, 123.08, 122.91, 122.16, 119.56. HRMS (ESI<sup>+</sup>) calcd for C<sub>52</sub>H<sub>38</sub>N<sub>2</sub>S [M + H]<sup>+</sup> 723.2828. Found 723.2833. Melt point: 149.1-150.3°C

## X-Ray Crystal Structures

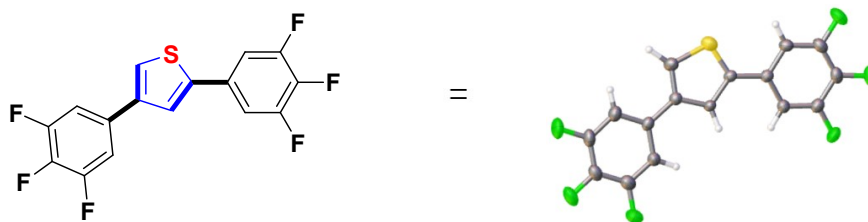

The low temperature ( $173 \pm 2^\circ\text{K}$ ) single-crystal X-ray experiments were performed on a SuperNova diffractometer with  $\text{Cu K}\alpha$  radiation. Unit cell was obtained and refined by 5388 reflections with  $4.5^\circ < \theta < 74.7^\circ$ . No decay was observed in data collection. Raw intensities were corrected for Lorentz and polarization effects, and for absorption by empirical method. Direct phase determination yielded the positions of all non-hydrogen atoms. All non-hydrogen atoms were subjected to anisotropic refinement. All hydrogen atoms were generated geometrically with C-H bonds of  $0.93 \text{ \AA}$  according to criteria described in the SHELXTL manual (Bruker, 1997). They were included in the refinement with  $U_{\text{iso}}(\text{H}) = 1.2U_{\text{eq}}$  of their parent atoms. There are two molecules,  $\text{C}_{16}\text{H}_6\text{F}_6\text{S}$ , in an independent area. It was found that the thiophene groups were disorientational disordered which were represented by S(1), C(4), S(1'), C(4') and S(2), C(20), S(2'), C(20'), respectively. Their occupancies were fixed in the final refinement to be 0.65 for S(1), C(4), 0.35 for S(1'), C(4') and 0.75 for S(2), C(20), 0.25 for S(2'), C(20'), respectively, according to the result of refinement for their occupancies before. The final full-matrix least-square refinement on  $F^2$  converged with  $R1 = 0.0912$  and  $wR2 = 0.1818$  for 3927 observed reflections [ $I \geq 2\sigma(I)$ ]. The final difference electron density map shows no features. Details of crystal parameters, data collection and structure refinement are given in Table 1.

Data collection was controlled by CrysAlisPro, Agilent Technologies, Version 1.171.36.32 (Oxford, 2013). Computations were performed using the SHELXTL NT ver. 5.10 program package (Bruker, 1997) on an IBM PC 586 computer. Analytic expressions of atomic scattering factors were employed, and anomalous dispersion corrections were incorporated (*International Tables for X-ray Crystallography*, 1989). Crystal drawings were produced with XP (Bruker, 1997).

### References

Bruker. (1997) SHELXTL. Structure Determination Programs, Version 5.10, Bruker AXS Inc., 6300 Enterprise Lane, Madison, WI 53719-1173, USA.

*International Tables for X-ray Crystallography*: (1989) Vol. C (Kluwer Academic Publishers, Dordrecht) Tables 4.2.6.8 and 6.1.1.4.

Oxford. (2013) CrysAlisPro, Agilent Technologies, Version 1.171.36.32, Oxford Diffraction Ltd., 68 Milton Park, Abingdon, Oxfordshire, OX14 4RX, UK.



Table 1. Details of Data Collection, Processing and Structure Refinement

|                                                                                        |                                                                       |                            |                                        |
|----------------------------------------------------------------------------------------|-----------------------------------------------------------------------|----------------------------|----------------------------------------|
| Sample code                                                                            | <b>2j</b>                                                             |                            |                                        |
| Molecular formula                                                                      | C <sub>16</sub> H <sub>6</sub> F <sub>6</sub> S                       |                            |                                        |
| Molecular weight                                                                       | 344.27                                                                |                            |                                        |
| Color and habit                                                                        | colorless needle                                                      |                            |                                        |
| Crystal size                                                                           | 0.19 mm × 0.20 mm × 0.27 mm                                           |                            |                                        |
| Crystal system                                                                         | monoclinic                                                            |                            |                                        |
| Space group                                                                            | P2 <sub>1</sub> /n (No. 14)                                           |                            |                                        |
| Unit cell parameters                                                                   | $a = 9.4232(4) \text{ \AA}$                                           | $\alpha = 90.00^\circ$     |                                        |
|                                                                                        | $b = 19.3491(8) \text{ \AA}$                                          | $\beta = 103.331(5)^\circ$ |                                        |
|                                                                                        | $c = 14.9248(7) \text{ \AA}$                                          | $\gamma = 90.00^\circ$     |                                        |
|                                                                                        | $V = 2647.9(2) \text{ \AA}^3$                                         | $Z = 8$                    | $F(000) = 1376$                        |
| Density (calcd)                                                                        | 1.727 g/cm <sup>3</sup>                                               |                            |                                        |
| Diffractometer                                                                         | SuperNova, Dual, Cu at home/near, AtlaS2                              |                            |                                        |
| Radiation                                                                              | Cu K <sub>α</sub> , $\lambda = 1.54178 \text{ \AA}$                   |                            |                                        |
| Temperature                                                                            | 173±2K                                                                |                            |                                        |
| Scan type                                                                              | $\omega$ -scan                                                        |                            |                                        |
| Data collection range                                                                  | $-9 < h < 11, -20 < k < 24, -17 < l < 18; \theta_{\max} = 75.4^\circ$ |                            |                                        |
| Reflections measured                                                                   | Total: 17966                                                          | Unique ( $n$ ): 5371       | Observed [ $I \geq 2\sigma(I)$ ]: 3927 |
| Absorption coefficient                                                                 | 2.840 mm <sup>-1</sup>                                                |                            |                                        |
| Minimum and maximum transmission                                                       | 0.430, 1.000                                                          |                            |                                        |
| No. of variables, $p$                                                                  | 429                                                                   |                            |                                        |
| Weighting scheme                                                                       | $w = \frac{1}{\sigma^2(F_o^2) + (0.001P)^2 + 4.5P}$                   | $P = (F_o^2 + 2F_c^2)/3$   |                                        |
| $R1 = \frac{\sum   F_o  -  F_c  }{\sum  F_o }$ (for all reflections)                   | 0.1229                                                                | 0.0912 (for observed data) |                                        |
| $wR2 = \sqrt{\frac{\sum [w(F_o^2 - F_c^2)]^2}{\sum w(F_o^2)^2}}$ (for all reflections) | 0.1897                                                                | 0.1818 (for observed data) |                                        |
| Goof = $S = \sqrt{\frac{\sum [w(F_o^2 - F_c^2)]}{n - p}}$                              | 1.507                                                                 |                            |                                        |
| Largest and mean $\Delta/\sigma$                                                       | 0.001, 0.000                                                          |                            |                                        |
| Residual extrema in final difference map                                               | -0.532 to 0.643 $e \text{ \AA}^{-3}$                                  |                            |                                        |

Table 2. Atomic coordinates and equivalent isotropic temperature factors\* ( $\text{\AA}^2$ )

| Atoms  | <i>x</i>   | <i>y</i>    | <i>z</i>    | $U_{eq.}$  | Occupancy |
|--------|------------|-------------|-------------|------------|-----------|
| S(1)   | 0.7270(3)  | 0.64340(10) | 0.73180(19) | 0.0330(5)  | 0.65      |
| C(4)   | 0.5743(15) | 0.6639(7)   | 0.6494(11)  | 0.0291(10) | 0.65      |
| S(1')  | 0.5935(6)  | 0.6795(2)   | 0.6589(5)   | 0.0291(10) | 0.35      |
| C(4')  | 0.718(3)   | 0.6256(10)  | 0.7236(17)  | 0.0330(5)  | 0.35      |
| S(2)   | 0.7596(2)  | 0.75397(9)  | 0.20980(18) | 0.0350(5)  | 0.75      |
| C(20)  | 0.6052(17) | 0.7335(8)   | 0.1294(14)  | 0.0346(16) | 0.75      |
| S(2')  | 0.6254(13) | 0.7192(5)   | 0.1400(10)  | 0.0346(16) | 0.25      |
| C(20') | 0.745(3)   | 0.7708(15)  | 0.213(3)    | 0.0350(5)  | 0.25      |
| F(1)   | 0.7831(5)  | 0.31715(18) | 0.7942(3)   | 0.0646(11) | 1.00      |
| F(2)   | 1.0354(4)  | 0.3481(2)   | 0.9149(2)   | 0.0581(10) | 1.00      |
| F(3)   | 1.1185(4)  | 0.4821(2)   | 0.9408(3)   | 0.0617(11) | 1.00      |
| F(4)   | 0.0636(4)  | 0.50689(17) | 0.4175(2)   | 0.0482(8)  | 1.00      |
| F(5)   | -0.0245(3) | 0.62966(19) | 0.3390(2)   | 0.0496(8)  | 1.00      |
| F(6)   | 0.1411(4)  | 0.74394(19) | 0.3903(3)   | 0.0577(10) | 1.00      |
| F(7)   | 1.1236(4)  | 0.9111(2)   | 0.4444(2)   | 0.0582(10) | 1.00      |
| F(8)   | 1.0443(4)  | 1.04533(19) | 0.4186(2)   | 0.0529(9)  | 1.00      |
| F(9)   | 0.7964(4)  | 1.07781(17) | 0.2946(3)   | 0.0593(10) | 1.00      |
| F(10)  | 0.1119(4)  | 0.6502(2)   | -0.0750(3)  | 0.0602(10) | 1.00      |
| F(11)  | -0.0179(4) | 0.7649(2)   | -0.1592(2)  | 0.0583(10) | 1.00      |
| F(12)  | 0.1072(4)  | 0.88966(19) | -0.1128(3)  | 0.0553(9)  | 1.00      |
| C(1)   | 0.6914(5)  | 0.5578(2)   | 0.7131(3)   | 0.0276(9)  | 1.00      |
| C(2)   | 0.5662(5)  | 0.5483(2)   | 0.6451(3)   | 0.0265(9)  | 1.00      |
| C(3)   | 0.4987(5)  | 0.6105(2)   | 0.6077(3)   | 0.0268(9)  | 1.00      |
| C(5)   | 0.7812(5)  | 0.5032(3)   | 0.7672(3)   | 0.0276(9)  | 1.00      |
| C(6)   | 0.7382(6)  | 0.4344(3)   | 0.7570(3)   | 0.0348(11) | 1.00      |
| C(7)   | 0.8252(7)  | 0.3834(3)   | 0.8068(4)   | 0.0427(13) | 1.00      |
| C(8)   | 0.9538(6)  | 0.3985(3)   | 0.8685(4)   | 0.0391(12) | 1.00      |
| C(9)   | 0.9939(6)  | 0.4673(3)   | 0.8800(4)   | 0.0414(13) | 1.00      |
| C(10)  | 0.9106(6)  | 0.5185(3)   | 0.8302(4)   | 0.0397(12) | 1.00      |
| C(11)  | 0.3629(5)  | 0.6154(2)   | 0.5365(3)   | 0.0258(9)  | 1.00      |
| C(12)  | 0.2756(5)  | 0.5573(2)   | 0.5093(3)   | 0.0291(10) | 1.00      |
| C(13)  | 0.1479(5)  | 0.5629(3)   | 0.4438(3)   | 0.0334(11) | 1.00      |
| C(14)  | 0.1013(6)  | 0.6262(3)   | 0.4036(3)   | 0.0348(11) | 1.00      |
| C(15)  | 0.1859(6)  | 0.6827(3)   | 0.4298(4)   | 0.0380(12) | 1.00      |
| C(16)  | 0.3151(5)  | 0.6791(3)   | 0.4952(4)   | 0.0338(11) | 1.00      |
| C(17)  | 0.7018(5)  | 0.8380(2)   | 0.2117(3)   | 0.0290(10) | 1.00      |
| C(18)  | 0.5666(5)  | 0.8463(2)   | 0.1520(3)   | 0.0274(9)  | 1.00      |
| C(19)  | 0.5111(5)  | 0.7848(2)   | 0.1056(3)   | 0.0313(10) | 1.00      |
| C(21)  | 0.7909(5)  | 0.8921(2)   | 0.2675(3)   | 0.0272(9)  | 1.00      |

(Table 2. continued)

| Atoms | <i>x</i>  | <i>y</i>  | <i>z</i>   | $U_{eq.}$  | <i>Occupancy</i> |
|-------|-----------|-----------|------------|------------|------------------|
| C(22) | 0.9183(5) | 0.8753(3) | 0.3331(3)  | 0.0342(11) | 1.00             |
| C(23) | 1.0012(6) | 0.9273(3) | 0.3824(3)  | 0.0391(12) | 1.00             |
| C(24) | 0.9626(6) | 0.9955(3) | 0.3701(3)  | 0.0382(12) | 1.00             |
| C(25) | 0.8363(6) | 1.0115(3) | 0.3062(4)  | 0.0405(12) | 1.00             |
| C(26) | 0.7508(6) | 0.9622(3) | 0.2554(3)  | 0.0344(11) | 1.00             |
| C(27) | 0.3717(5) | 0.7792(3) | 0.0364(3)  | 0.0308(10) | 1.00             |
| C(28) | 0.3055(6) | 0.7150(3) | 0.0126(4)  | 0.0392(12) | 1.00             |
| C(29) | 0.1754(6) | 0.7113(3) | -0.0516(4) | 0.0424(13) | 1.00             |
| C(30) | 0.1086(6) | 0.7692(3) | -0.0954(4) | 0.0395(12) | 1.00             |
| C(31) | 0.1730(6) | 0.8329(3) | -0.0709(4) | 0.0359(11) | 1.00             |
| C(32) | 0.3024(5) | 0.8380(3) | -0.0065(3) | 0.0339(11) | 1.00             |

\* $U_{eq.}$  defined as one third of the trace of the orthogonalized U tensor.

Table 3. Bond lengths (Å) and bond angles (°)

| Molecule I       |           | Molecule II        |           |
|------------------|-----------|--------------------|-----------|
| S(1)-C(1)        | 1.700(5)  | S(2)-C(20)         | 1.705(10) |
| S(1)-C(4)        | 1.710(9)  | S(2)-C(17)         | 1.718(4)  |
| C(4)-C(3)        | 1.326(14) | C(20)-C(19)        | 1.323(16) |
| S(1')-C(3)       | 1.688(5)  | S(2')-C(19)        | 1.666(7)  |
| S(1')-C(4')      | 1.694(10) | S(2')-C(20')       | 1.699(10) |
| C(4')-C(1)       | 1.34(2)   | C(20')-C(17)       | 1.36(3)   |
| F(1)-C(7)        | 1.343(7)  | F(7)-C(23)         | 1.338(6)  |
| F(2)-C(8)        | 1.333(6)  | F(8)-C(24)         | 1.338(6)  |
| F(3)-C(9)        | 1.339(6)  | F(9)-C(25)         | 1.337(6)  |
| F(4)-C(13)       | 1.347(6)  | F(10)-C(29)        | 1.336(6)  |
| F(5)-C(14)       | 1.345(6)  | F(11)-C(30)        | 1.345(6)  |
| F(6)-C(15)       | 1.347(6)  | F(12)-C(31)        | 1.342(6)  |
| C(1)-C(2)        | 1.380(6)  | C(17)-C(18)        | 1.385(6)  |
| C(1)-C(5)        | 1.472(7)  | C(17)-C(21)        | 1.473(7)  |
| C(2)-C(3)        | 1.415(6)  | C(18)-C(19)        | 1.416(7)  |
| C(3)-C(11)       | 1.465(6)  | C(19)-C(27)        | 1.476(7)  |
| C(5)-C(10)       | 1.389(7)  | C(21)-C(22)        | 1.401(6)  |
| C(5)-C(6)        | 1.391(7)  | C(21)-C(26)        | 1.410(7)  |
| C(6)-C(7)        | 1.384(7)  | C(22)-C(23)        | 1.377(8)  |
| C(7)-C(8)        | 1.374(8)  | C(23)-C(24)        | 1.370(8)  |
| C(8)-C(9)        | 1.383(8)  | C(24)-C(25)        | 1.377(8)  |
| C(9)-C(10)       | 1.372(8)  | C(25)-C(26)        | 1.361(7)  |
| C(11)-C(12)      | 1.397(7)  | C(27)-C(32)        | 1.392(7)  |
| C(11)-C(16)      | 1.404(7)  | C(27)-C(28)        | 1.398(7)  |
| C(12)-C(13)      | 1.369(7)  | C(28)-C(29)        | 1.372(7)  |
| C(13)-C(14)      | 1.390(7)  | C(29)-C(30)        | 1.374(9)  |
| C(14)-C(15)      | 1.357(8)  | C(30)-C(31)        | 1.386(8)  |
| C(15)-C(16)      | 1.376(7)  | C(31)-C(32)        | 1.371(7)  |
| C(1)-S(1)-C(4)   | 90.4(5)   | C(20)-S(2)-C(17)   | 90.5(6)   |
| C(3)-C(4)-S(1)   | 115.5(9)  | C(19)-C(20)-S(2)   | 115.2(10) |
| C(3)-S(1')-C(4') | 89.8(9)   | C(19)-S(2')-C(20') | 92.1(13)  |
| C(1)-C(4')-S(1') | 116.8(14) | C(17)-C(20')-S(2') | 113.6(19) |
| C(4')-C(1)-C(2)  | 108.8(8)  | C(20')-C(17)-C(18) | 110.3(9)  |
| C(4')-C(1)-C(5)  | 124.8(8)  | C(20')-C(17)-C(21) | 122.7(9)  |
| C(2)-C(1)-C(5)   | 126.4(4)  | C(18)-C(17)-C(21)  | 127.0(4)  |
| C(2)-C(1)-S(1)   | 110.7(3)  | C(18)-C(17)-S(2)   | 110.3(3)  |
| C(5)-C(1)-S(1)   | 122.8(4)  | C(21)-C(17)-S(2)   | 122.6(4)  |
| C(1)-C(2)-C(3)   | 114.0(4)  | C(17)-C(18)-C(19)  | 113.5(4)  |
| C(4)-C(3)-C(2)   | 109.4(6)  | C(20)-C(19)-C(18)  | 110.5(6)  |
| C(4)-C(3)-C(11)  | 125.1(6)  | C(20)-C(19)-C(27)  | 124.5(7)  |

(Table 3. continued)

|                   |          |                   |          |
|-------------------|----------|-------------------|----------|
| C(2)-C(3)-C(11)   | 125.5(4) | C(18)-C(19)-C(27) | 124.9(4) |
| C(2)-C(3)-S(1')   | 110.5(4) | C(18)-C(19)-S(2') | 110.5(5) |
| C(11)-C(3)-S(1')  | 124.0(4) | C(27)-C(19)-S(2') | 124.6(5) |
| C(10)-C(5)-C(6)   | 117.7(5) | C(22)-C(21)-C(26) | 118.3(4) |
| C(10)-C(5)-C(1)   | 121.5(5) | C(22)-C(21)-C(17) | 121.1(4) |
| C(6)-C(5)-C(1)    | 120.8(4) | C(26)-C(21)-C(17) | 120.6(4) |
| C(7)-C(6)-C(5)    | 120.2(5) | C(23)-C(22)-C(21) | 119.6(5) |
| F(1)-C(7)-C(8)    | 118.9(5) | F(7)-C(23)-C(22)  | 119.4(5) |
| F(1)-C(7)-C(6)    | 119.0(5) | F(7)-C(23)-C(24)  | 118.5(5) |
| C(8)-C(7)-C(6)    | 122.1(5) | C(22)-C(23)-C(24) | 122.1(5) |
| F(2)-C(8)-C(7)    | 120.5(5) | F(8)-C(24)-C(25)  | 120.6(5) |
| F(2)-C(8)-C(9)    | 122.1(5) | F(8)-C(24)-C(23)  | 121.3(5) |
| C(7)-C(8)-C(9)    | 117.4(5) | C(25)-C(24)-C(23) | 118.0(5) |
| F(3)-C(9)-C(10)   | 121.0(6) | F(9)-C(25)-C(26)  | 119.1(5) |
| F(3)-C(9)-C(8)    | 117.5(5) | F(9)-C(25)-C(24)  | 118.5(5) |
| C(10)-C(9)-C(8)   | 121.5(5) | C(26)-C(25)-C(24) | 122.3(5) |
| C(9)-C(10)-C(5)   | 121.1(5) | C(25)-C(26)-C(21) | 119.7(5) |
| C(12)-C(11)-C(16) | 118.1(4) | C(32)-C(27)-C(28) | 118.3(5) |
| C(12)-C(11)-C(3)  | 121.0(4) | C(32)-C(27)-C(19) | 120.6(4) |
| C(16)-C(11)-C(3)  | 120.9(4) | C(28)-C(27)-C(19) | 121.1(5) |
| C(13)-C(12)-C(11) | 120.4(4) | C(29)-C(28)-C(27) | 119.9(5) |
| F(4)-C(13)-C(12)  | 120.5(5) | F(10)-C(29)-C(30) | 117.9(5) |
| F(4)-C(13)-C(14)  | 118.5(4) | F(10)-C(29)-C(28) | 120.2(6) |
| C(12)-C(13)-C(14) | 121.0(5) | C(30)-C(29)-C(28) | 121.8(5) |
| F(5)-C(14)-C(15)  | 121.9(5) | F(11)-C(30)-C(29) | 121.3(5) |
| F(5)-C(14)-C(13)  | 119.4(5) | F(11)-C(30)-C(31) | 120.3(5) |
| C(15)-C(14)-C(13) | 118.7(5) | C(29)-C(30)-C(31) | 118.3(5) |
| F(6)-C(15)-C(14)  | 118.6(5) | F(12)-C(31)-C(32) | 120.6(5) |
| F(6)-C(15)-C(16)  | 119.5(5) | F(12)-C(31)-C(30) | 118.5(5) |
| C(14)-C(15)-C(16) | 121.9(5) | C(32)-C(31)-C(30) | 120.9(5) |
| C(15)-C(16)-C(11) | 119.8(5) | C(31)-C(32)-C(27) | 120.7(5) |

Table 4. Anisotropic thermal parameters\* ( $\text{\AA}^2$ )

| Atoms  | $U_{11}$   | $U_{22}$   | $U_{33}$   | $U_{23}$    | $U_{13}$    | $U_{12}$    |
|--------|------------|------------|------------|-------------|-------------|-------------|
| S(1)   | 0.0281(9)  | 0.0284(13) | 0.0396(10) | -0.0055(10) | 0.0019(7)   | -0.0061(10) |
| C(4)   | 0.028(2)   | 0.016(3)   | 0.041(2)   | -0.0034(19) | 0.0035(13)  | -0.0087(18) |
| S(1')  | 0.028(2)   | 0.016(3)   | 0.041(2)   | -0.0034(19) | 0.0035(13)  | -0.0087(18) |
| C(4')  | 0.0281(9)  | 0.0284(13) | 0.0396(10) | -0.0055(10) | 0.0019(7)   | -0.0061(10) |
| S(2)   | 0.0351(9)  | 0.0245(11) | 0.0412(8)  | 0.0052(9)   | 0.0001(7)   | 0.0056(8)   |
| C(20)  | 0.041(3)   | 0.014(4)   | 0.045(4)   | 0.007(3)    | 0.001(2)    | 0.009(3)    |
| S(2')  | 0.041(3)   | 0.014(4)   | 0.045(4)   | 0.007(3)    | 0.001(2)    | 0.009(3)    |
| C(20') | 0.0351(9)  | 0.0245(11) | 0.0412(8)  | 0.0052(9)   | 0.0001(7)   | 0.0056(8)   |
| F(1)   | 0.079(3)   | 0.0329(19) | 0.070(3)   | 0.0079(17)  | -0.007(2)   | 0.0078(18)  |
| F(2)   | 0.061(2)   | 0.055(2)   | 0.051(2)   | 0.0104(17)  | -0.0024(17) | 0.0234(18)  |
| F(3)   | 0.0447(19) | 0.073(3)   | 0.053(2)   | 0.0014(18)  | -0.0185(17) | 0.0045(18)  |
| F(4)   | 0.0459(18) | 0.0419(19) | 0.0458(18) | -0.0084(14) | -0.0119(15) | -0.0117(15) |
| F(5)   | 0.0407(17) | 0.064(2)   | 0.0379(17) | 0.0038(15)  | -0.0026(14) | 0.0117(16)  |
| F(6)   | 0.061(2)   | 0.043(2)   | 0.064(2)   | 0.0193(17)  | 0.0040(18)  | 0.0176(17)  |
| F(7)   | 0.0408(18) | 0.078(3)   | 0.0440(19) | -0.0050(18) | -0.0147(15) | 0.0044(18)  |
| F(8)   | 0.052(2)   | 0.059(2)   | 0.0448(19) | -0.0165(16) | 0.0054(15)  | -0.0139(17) |
| F(9)   | 0.071(2)   | 0.0310(18) | 0.065(2)   | -0.0070(16) | -0.0066(19) | -0.0006(17) |
| F(10)  | 0.059(2)   | 0.050(2)   | 0.070(2)   | -0.0247(18) | 0.0121(19)  | -0.0220(18) |
| F(11)  | 0.0403(17) | 0.080(3)   | 0.049(2)   | -0.0195(18) | -0.0009(15) | -0.0104(18) |
| F(12)  | 0.0460(18) | 0.050(2)   | 0.058(2)   | 0.0009(17)  | -0.0124(16) | 0.0099(16)  |
| C(1)   | 0.029(2)   | 0.025(2)   | 0.029(2)   | -0.0002(18) | 0.0074(18)  | 0.0014(19)  |
| C(2)   | 0.027(2)   | 0.022(2)   | 0.028(2)   | -0.0013(17) | 0.0023(18)  | 0.0016(18)  |
| C(3)   | 0.026(2)   | 0.024(2)   | 0.032(2)   | -0.0013(18) | 0.0100(18)  | -0.0001(18) |
| C(5)   | 0.023(2)   | 0.030(2)   | 0.028(2)   | -0.0060(18) | 0.0015(17)  | -0.0013(18) |
| C(6)   | 0.035(3)   | 0.032(3)   | 0.034(3)   | 0.000(2)    | -0.001(2)   | 0.006(2)    |
| C(7)   | 0.054(3)   | 0.032(3)   | 0.041(3)   | 0.003(2)    | 0.010(3)    | 0.009(3)    |
| C(8)   | 0.040(3)   | 0.040(3)   | 0.035(3)   | 0.006(2)    | 0.004(2)    | 0.015(2)    |
| C(9)   | 0.031(3)   | 0.056(4)   | 0.032(3)   | -0.002(2)   | -0.005(2)   | 0.005(2)    |
| C(10)  | 0.034(3)   | 0.043(3)   | 0.038(3)   | -0.007(2)   | 0.001(2)    | 0.001(2)    |
| C(11)  | 0.027(2)   | 0.024(2)   | 0.026(2)   | -0.0012(17) | 0.0061(17)  | -0.0009(18) |
| C(12)  | 0.029(2)   | 0.026(2)   | 0.030(2)   | 0.0026(18)  | 0.0028(19)  | 0.0010(19)  |
| C(13)  | 0.035(3)   | 0.031(3)   | 0.034(3)   | -0.004(2)   | 0.007(2)    | -0.004(2)   |
| C(14)  | 0.035(2)   | 0.042(3)   | 0.026(2)   | 0.005(2)    | 0.0024(19)  | 0.008(2)    |
| C(15)  | 0.043(3)   | 0.031(3)   | 0.039(3)   | 0.009(2)    | 0.008(2)    | 0.014(2)    |
| C(16)  | 0.035(2)   | 0.026(2)   | 0.041(3)   | -0.002(2)   | 0.008(2)    | -0.001(2)   |
| C(17)  | 0.033(2)   | 0.022(2)   | 0.034(2)   | 0.0035(18)  | 0.010(2)    | 0.0006(19)  |
| C(18)  | 0.027(2)   | 0.023(2)   | 0.032(2)   | 0.0032(18)  | 0.0050(18)  | 0.0003(18)  |
| C(19)  | 0.035(2)   | 0.029(3)   | 0.031(2)   | -0.0009(19) | 0.011(2)    | -0.004(2)   |
| C(21)  | 0.031(2)   | 0.025(2)   | 0.026(2)   | -0.0005(18) | 0.0062(18)  | -0.0021(19) |

(Table 4. continued)

| Atoms | $U_{11}$ | $U_{22}$ | $U_{33}$ | $U_{23}$    | $U_{13}$   | $U_{12}$  |
|-------|----------|----------|----------|-------------|------------|-----------|
| C(22) | 0.030(2) | 0.043(3) | 0.029(2) | 0.003(2)    | 0.0039(19) | 0.007(2)  |
| C(23) | 0.034(3) | 0.055(4) | 0.025(2) | -0.003(2)   | 0.001(2)   | 0.002(2)  |
| C(24) | 0.045(3) | 0.039(3) | 0.030(2) | -0.012(2)   | 0.008(2)   | -0.014(2) |
| C(25) | 0.053(3) | 0.029(3) | 0.040(3) | -0.003(2)   | 0.011(2)   | -0.005(2) |
| C(26) | 0.036(3) | 0.032(3) | 0.032(2) | -0.002(2)   | 0.001(2)   | 0.005(2)  |
| C(27) | 0.030(2) | 0.031(3) | 0.032(2) | -0.0035(19) | 0.0103(19) | -0.004(2) |
| C(28) | 0.039(3) | 0.039(3) | 0.039(3) | -0.006(2)   | 0.008(2)   | 0.002(2)  |
| C(29) | 0.038(3) | 0.044(3) | 0.045(3) | -0.019(2)   | 0.010(2)   | -0.014(2) |
| C(30) | 0.035(3) | 0.048(3) | 0.035(3) | -0.012(2)   | 0.007(2)   | -0.007(2) |
| C(31) | 0.034(2) | 0.034(3) | 0.038(3) | -0.001(2)   | 0.005(2)   | 0.003(2)  |
| C(32) | 0.032(2) | 0.034(3) | 0.035(2) | -0.004(2)   | 0.005(2)   | -0.002(2) |

\*The exponent takes the form:  $-2\pi^2 \sum \sum U_{ij} h_i h_j \mathbf{a}_i^* \mathbf{a}_j^*$

Table 5. Coordinates and isotropic temperature factors\* ( $\text{\AA}^2$ ) for H atoms

| Atoms  | <i>x</i> | <i>y</i> | <i>z</i> | $U_{eq.}$ | <i>Occupancy</i> |
|--------|----------|----------|----------|-----------|------------------|
| H(4A)  | 0.5463   | 0.7093   | 0.6348   | 0.035     | 0.65             |
| H(4B)  | 0.8004   | 0.6423   | 0.7645   | 0.040     | 0.35             |
| H(20A) | 0.5884   | 0.6896   | 0.1041   | 0.042     | 0.75             |
| H(20B) | 0.8316   | 0.7547   | 0.2503   | 0.042     | 0.25             |
| H(2A)  | 0.5296   | 0.5048   | 0.6255   | 0.032     | 1.00             |
| H(6A)  | 0.6508   | 0.4225   | 0.7167   | 0.042     | 1.00             |
| H(10A) | 0.9413   | 0.5642   | 0.8388   | 0.048     | 1.00             |
| H(12A) | 0.3044   | 0.5146   | 0.5360   | 0.035     | 1.00             |
| H(16A) | 0.3707   | 0.7188   | 0.5121   | 0.041     | 1.00             |
| H(18A) | 0.5171   | 0.8883   | 0.1432   | 0.033     | 1.00             |
| H(22A) | 0.9468   | 0.8294   | 0.3434   | 0.041     | 1.00             |
| H(26A) | 0.6662   | 0.9748   | 0.2128   | 0.041     | 1.00             |
| H(28A) | 0.3495   | 0.6749   | 0.0402   | 0.047     | 1.00             |
| H(32A) | 0.3444   | 0.8812   | 0.0087   | 0.041     | 1.00             |

\*The exponent takes the form:  $-8\pi^2 U \sin^2\theta / \lambda^2$



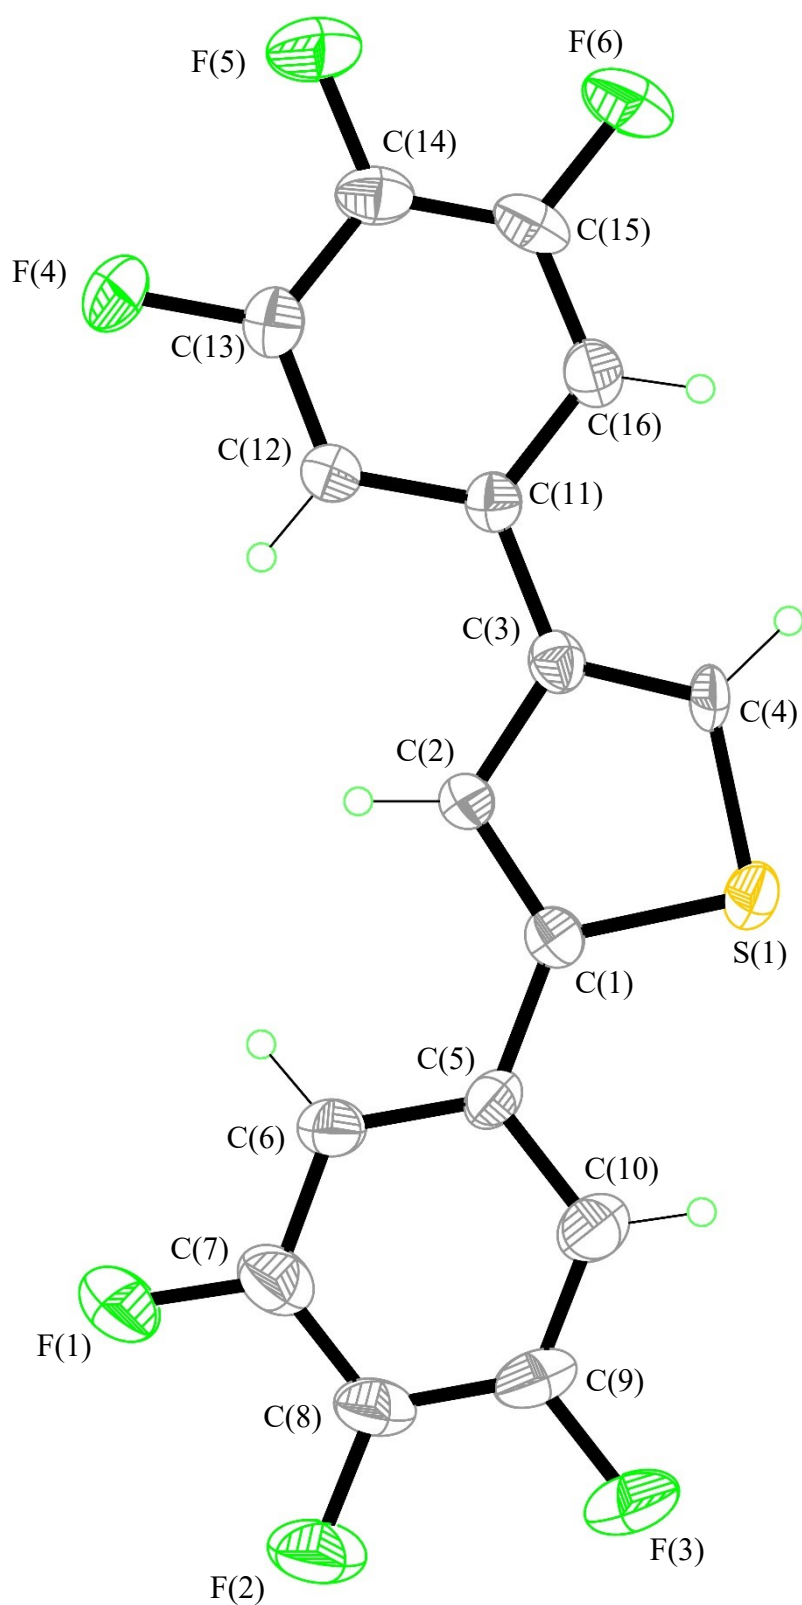

Molecule I

ORTEP drawing of C<sub>16</sub>H<sub>6</sub>F<sub>6</sub>S with 50% probability ellipsoids, showing the atomic numbering scheme.

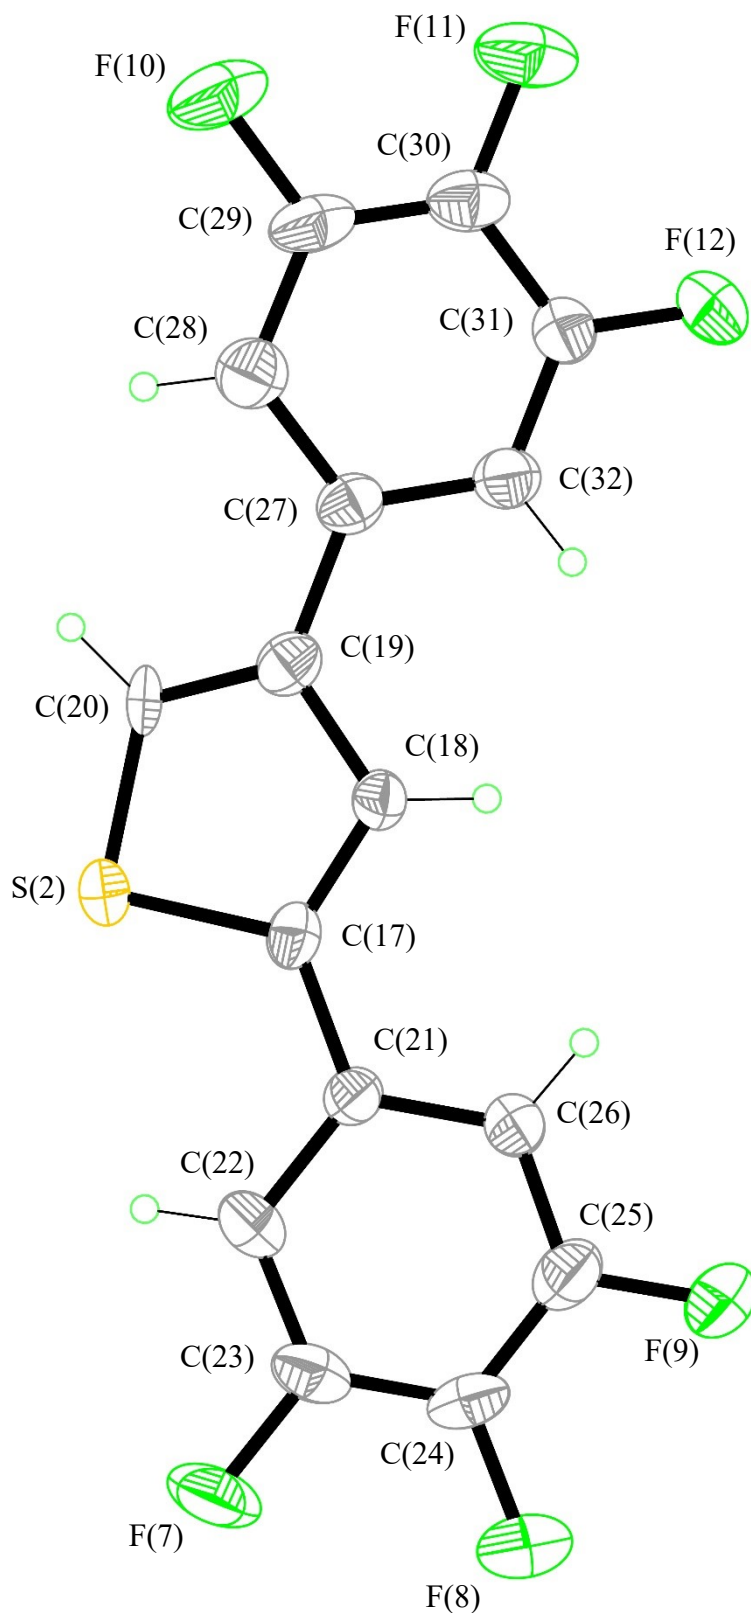

Molecule II

ORTEP drawing of  $C_{16}H_6F_6S$  with 50% probability ellipsoids, showing the atomic numbering scheme.

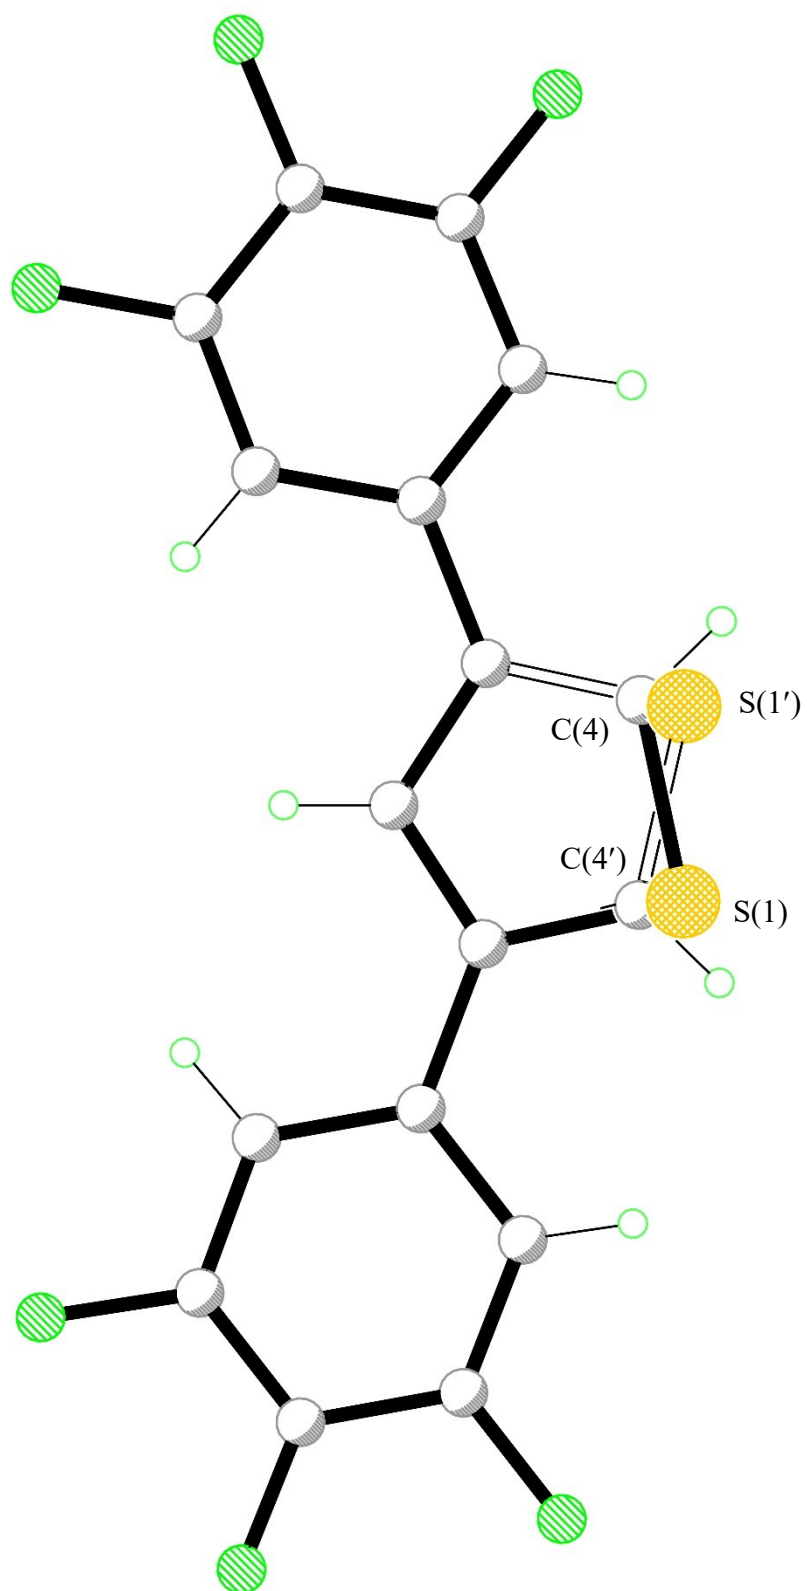

A view to show the diorientational disorder of thiophene group in molecule **I**, solid bonds for an orientation and open bonds for another.

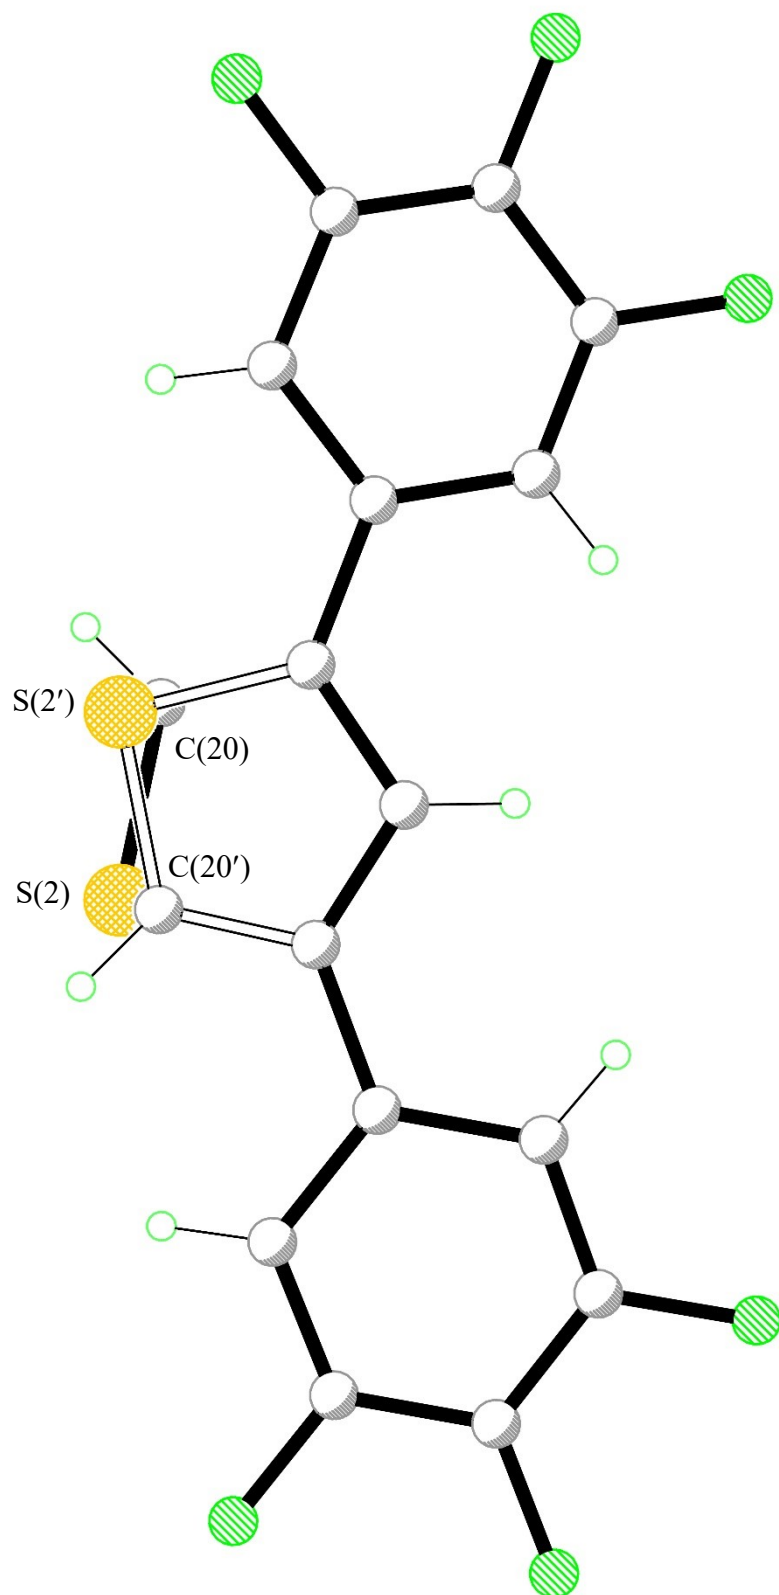

A view to show the diorientational disorder of thiophene group in molecule **II**, solid bonds for an orientation and open bonds for another.

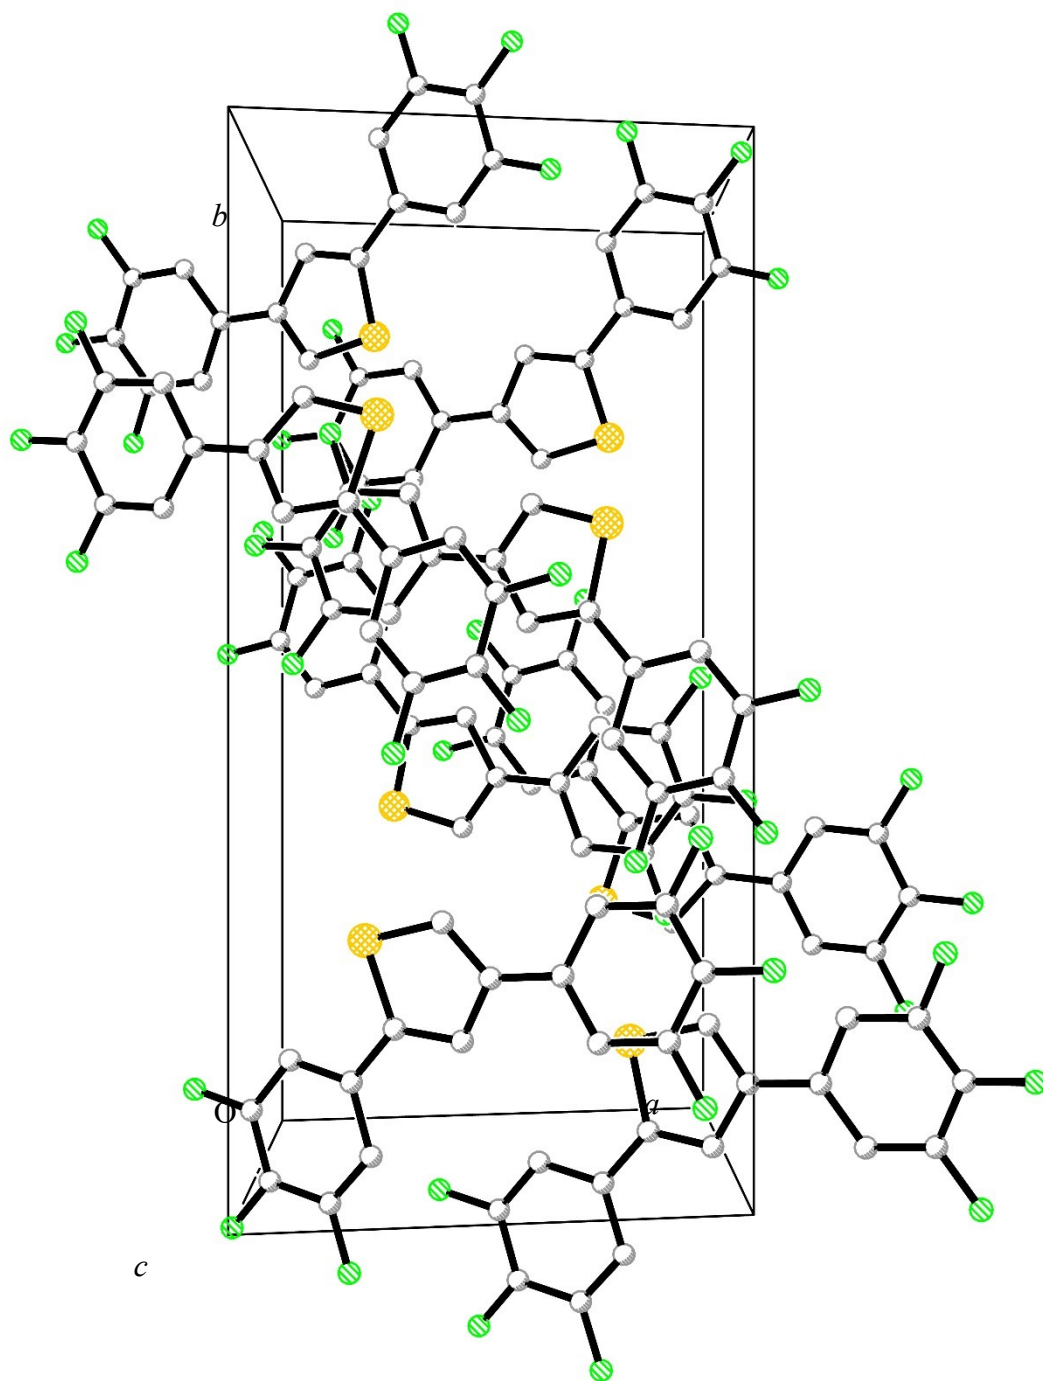

A packing view along the  $c$  direction

**References**

- (1) Y. Wang, C. Chen, J. Peng, M. Li, *Angew. Chem. Int. Ed.* 2013, **52**, 5323.
- (2) J. Sheng, X. Su, C. Cao, C. Chen, *Org. Chem. Front.* 2016, **3**, 501.
- (3) M. G. Suero, E. D. Bayle, B. S. L. Collins, M. J. Gaunt, *J. Am. Chem. Soc.* 2013, **135**, 5332.
- (4) Cahard, N. Bremeyer, M. J. Gaunt, *Angew. Chem. Int. Ed.* 2013, **52**, 9284;
- (5) J. Sheng, X. Su, C. Cao, C. Chen, *Org. Chem. Front.* 2016, **3**, 501.
- (6) J. M. Teng, Y. F. Wang, C. F. Chen, *J. Mater. Chem. C.* 2020, **8**, 11340.

# <sup>1</sup>H and <sup>13</sup>C NMR Spectra

## 2,4-Diphenylthiophene (2a)

7.66  
7.64  
7.62  
7.59  
7.43  
7.41  
7.40  
7.38  
7.32  
7.30  
7.29

CDCl<sub>3</sub>, <sup>1</sup>H NMR, 400 MHz

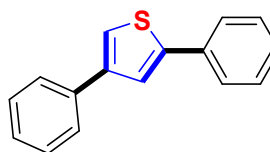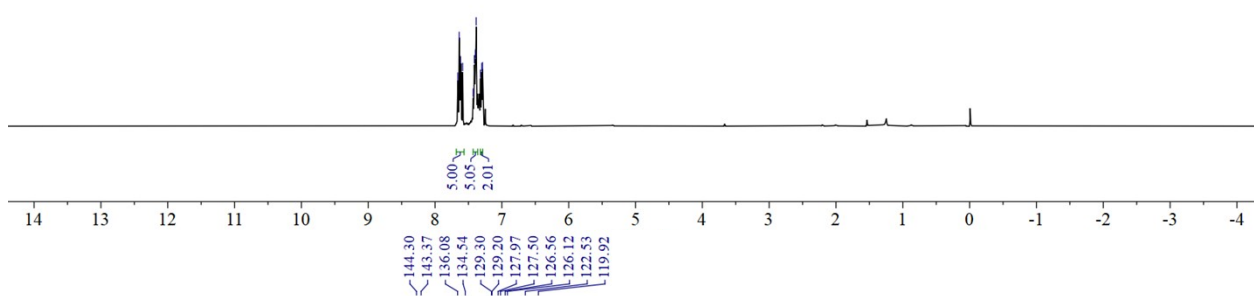

CDCl<sub>3</sub>, <sup>13</sup>C NMR, 101 MHz

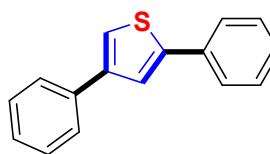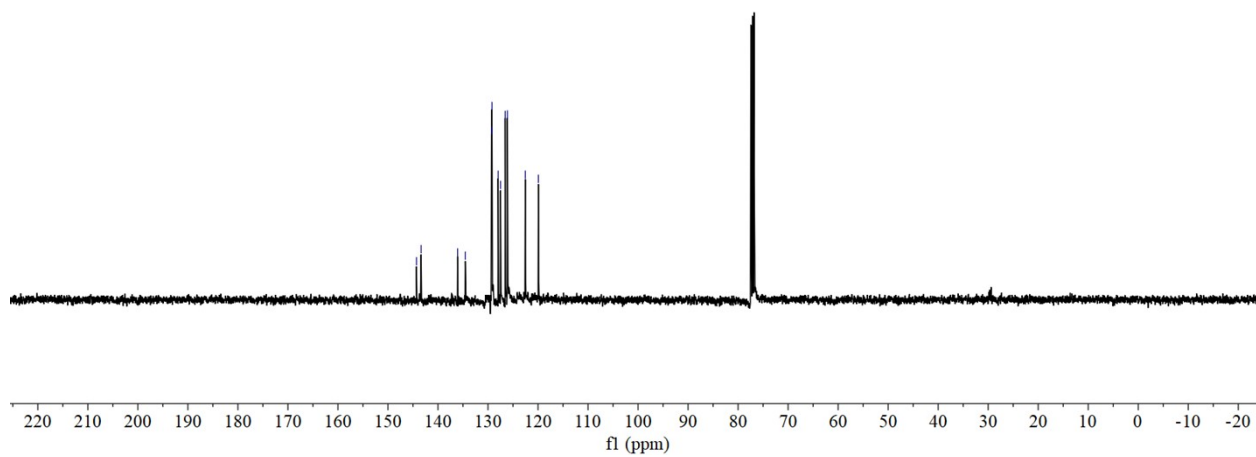

2,4-Di-*p*-tolylthiophene (2b)CDCl<sub>3</sub>, <sup>1</sup>H NMR, 400 MHz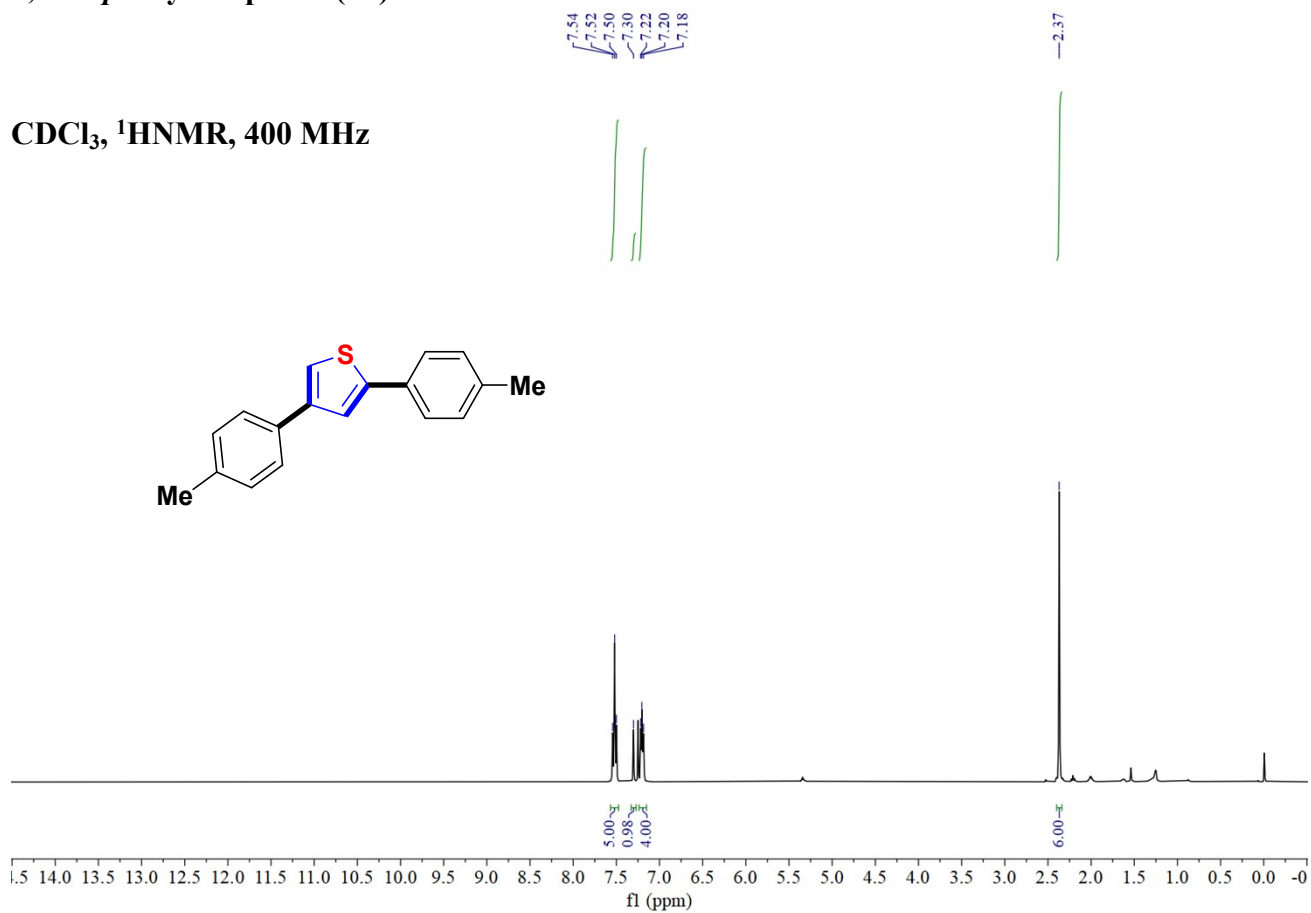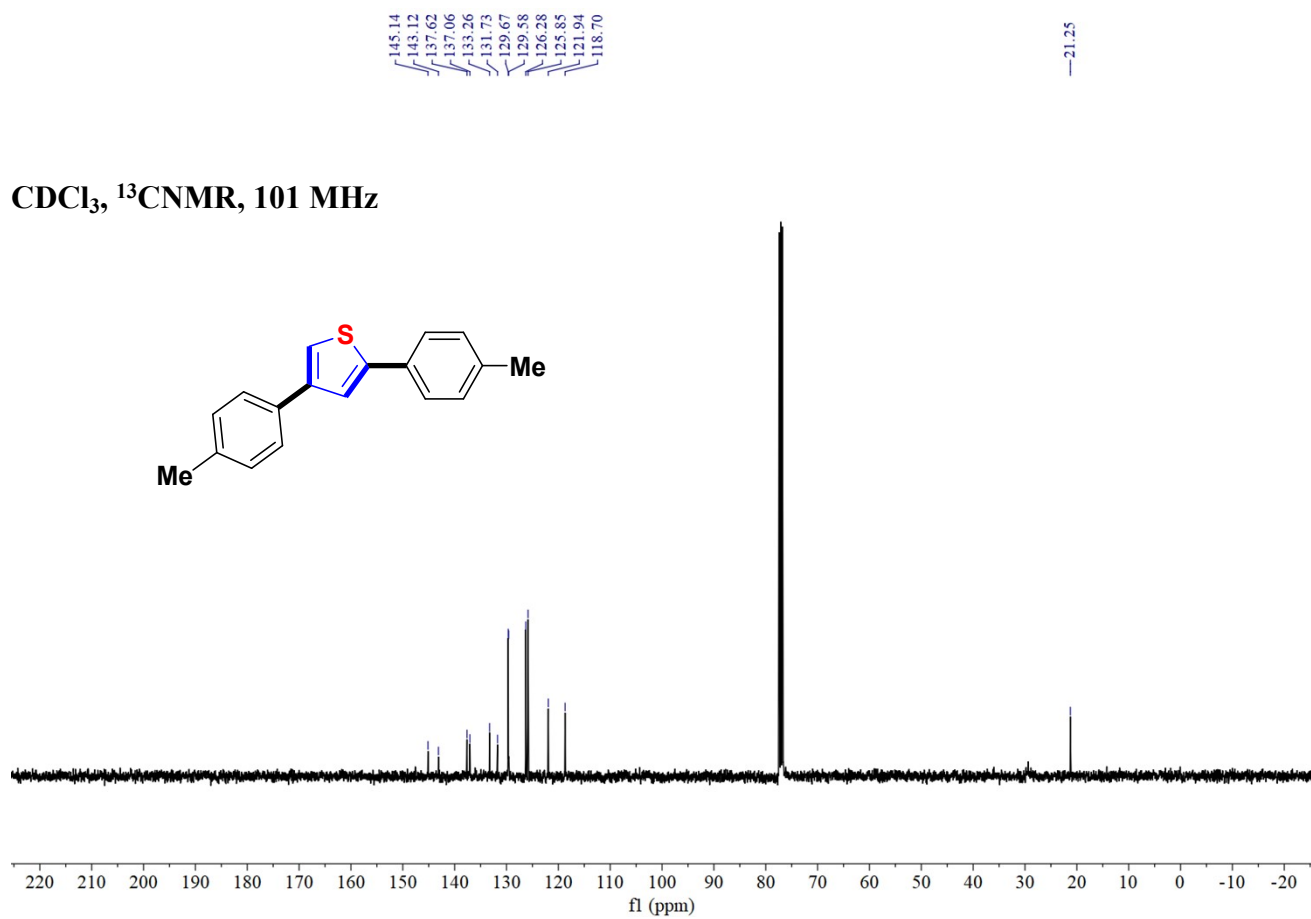



2,4-Di-*m*-tolylthiophene (2c)CDCl<sub>3</sub>, <sup>1</sup>HNMR, 400 MHz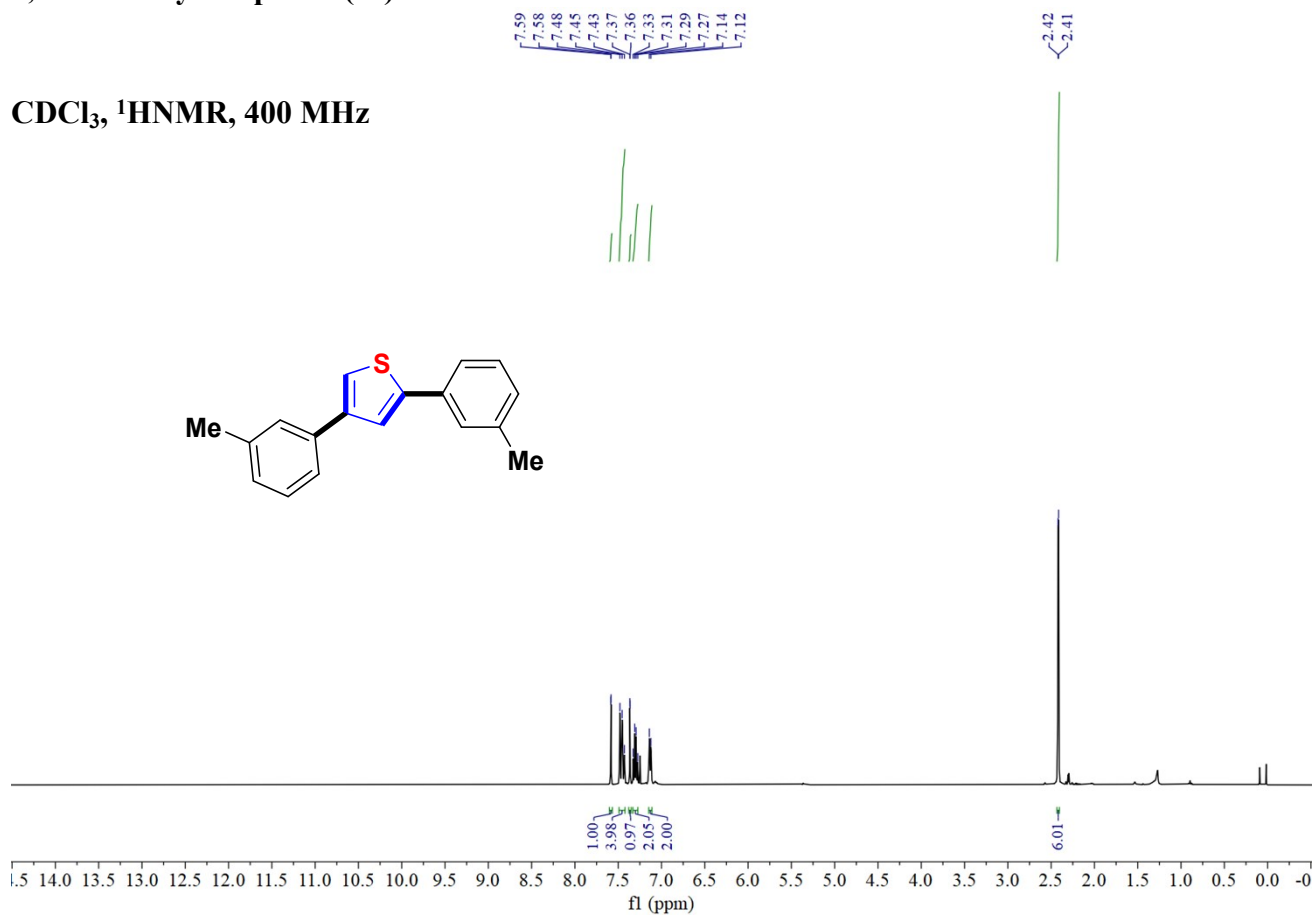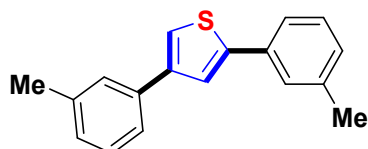CDCl<sub>3</sub>, <sup>13</sup>CNMR, 101 MHz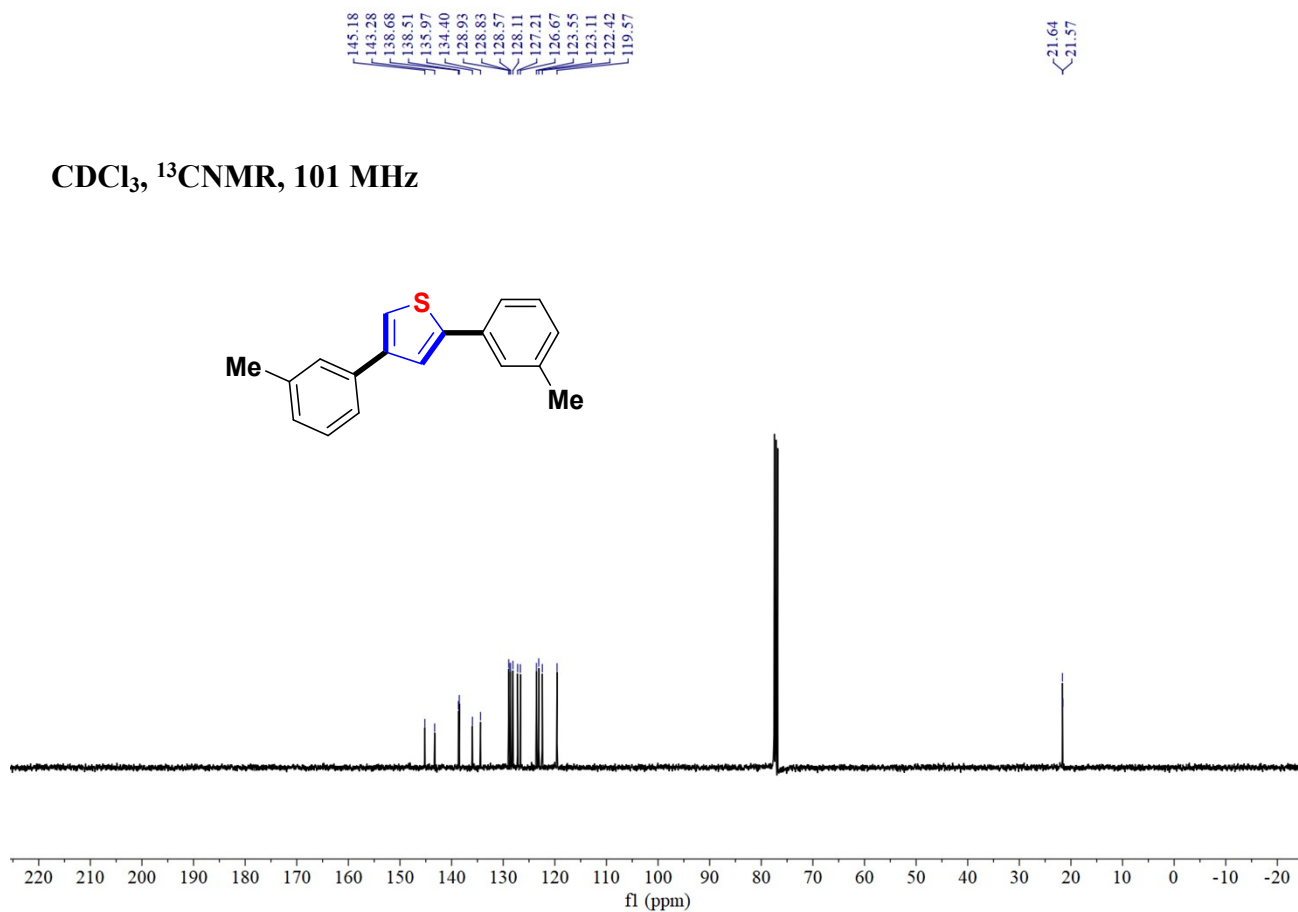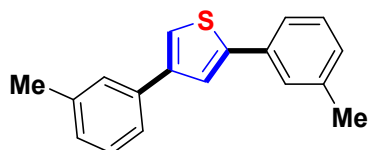

2,4-Di-*o*-tolylthiophene (2d)CDCl<sub>3</sub>, <sup>1</sup>HNMR, 400 MHz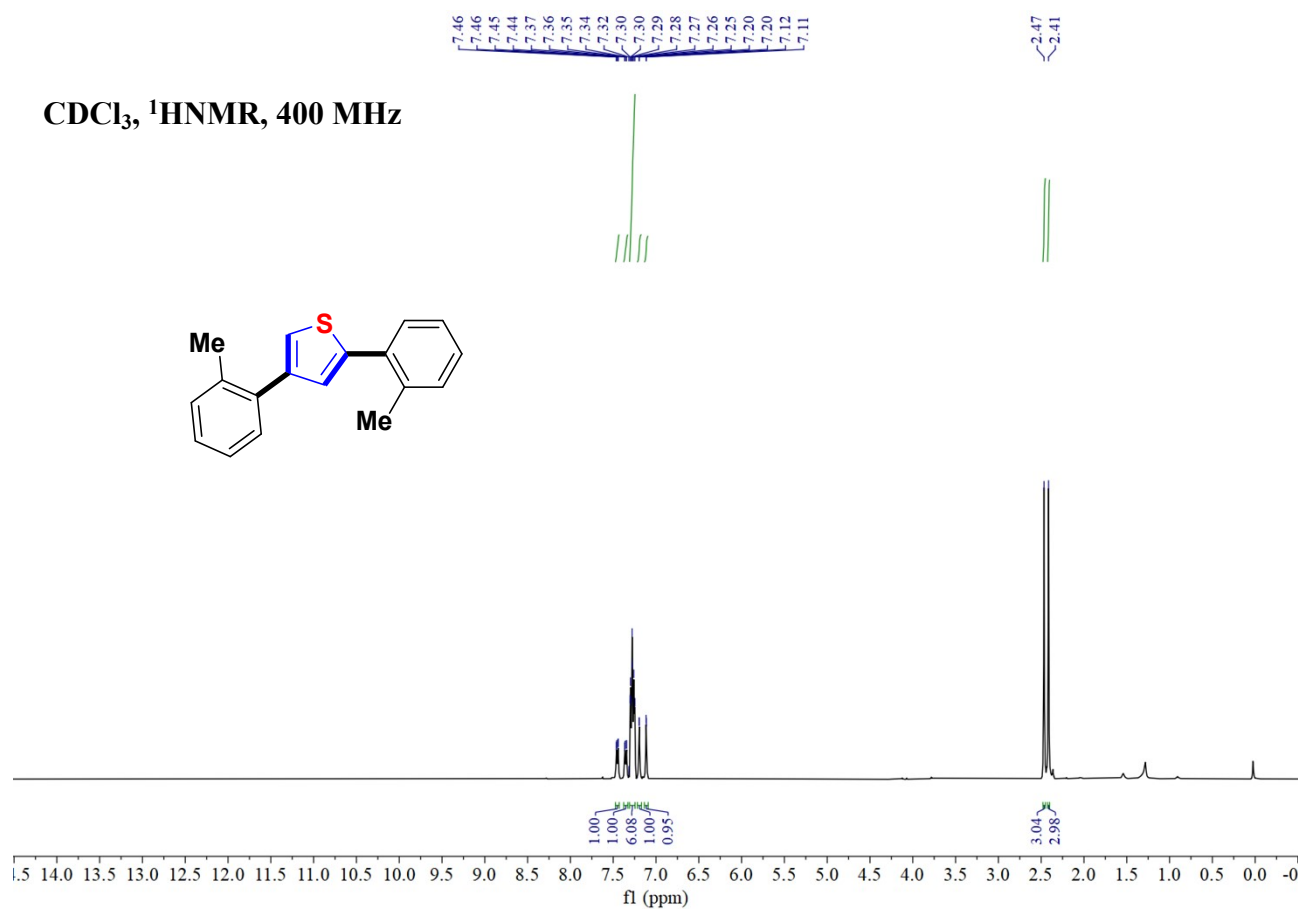CDCl<sub>3</sub>, <sup>13</sup>CNMR, 101 MHz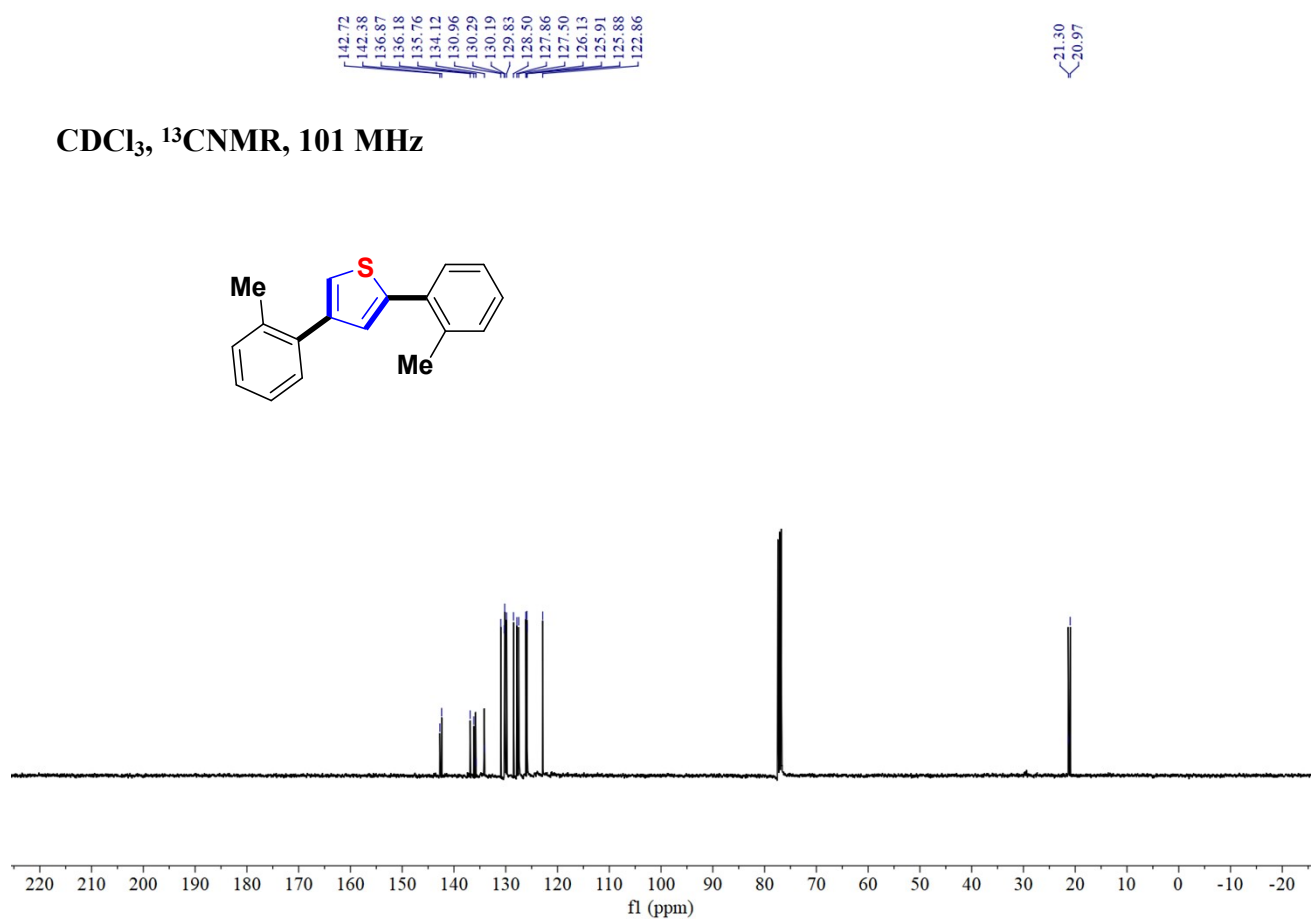

## 2,4-Di-(3, 5-dimethylphenyl)-thiophene (2e)

CDCl<sub>3</sub>, <sup>1</sup>HNMR, 400 MHz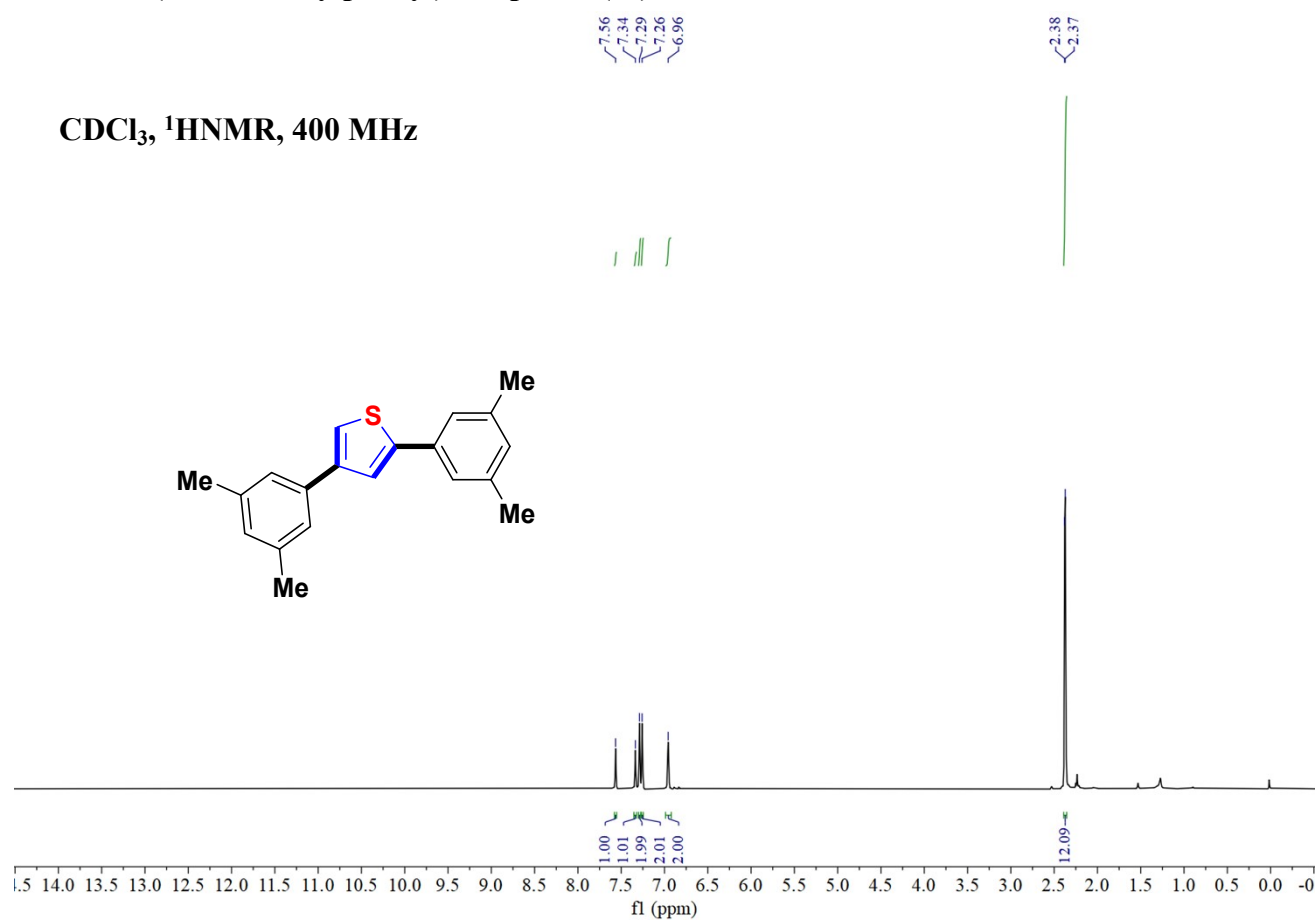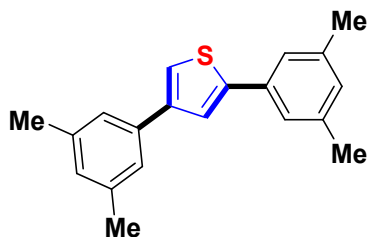CDCl<sub>3</sub>, <sup>13</sup>CNMR, 101 MHz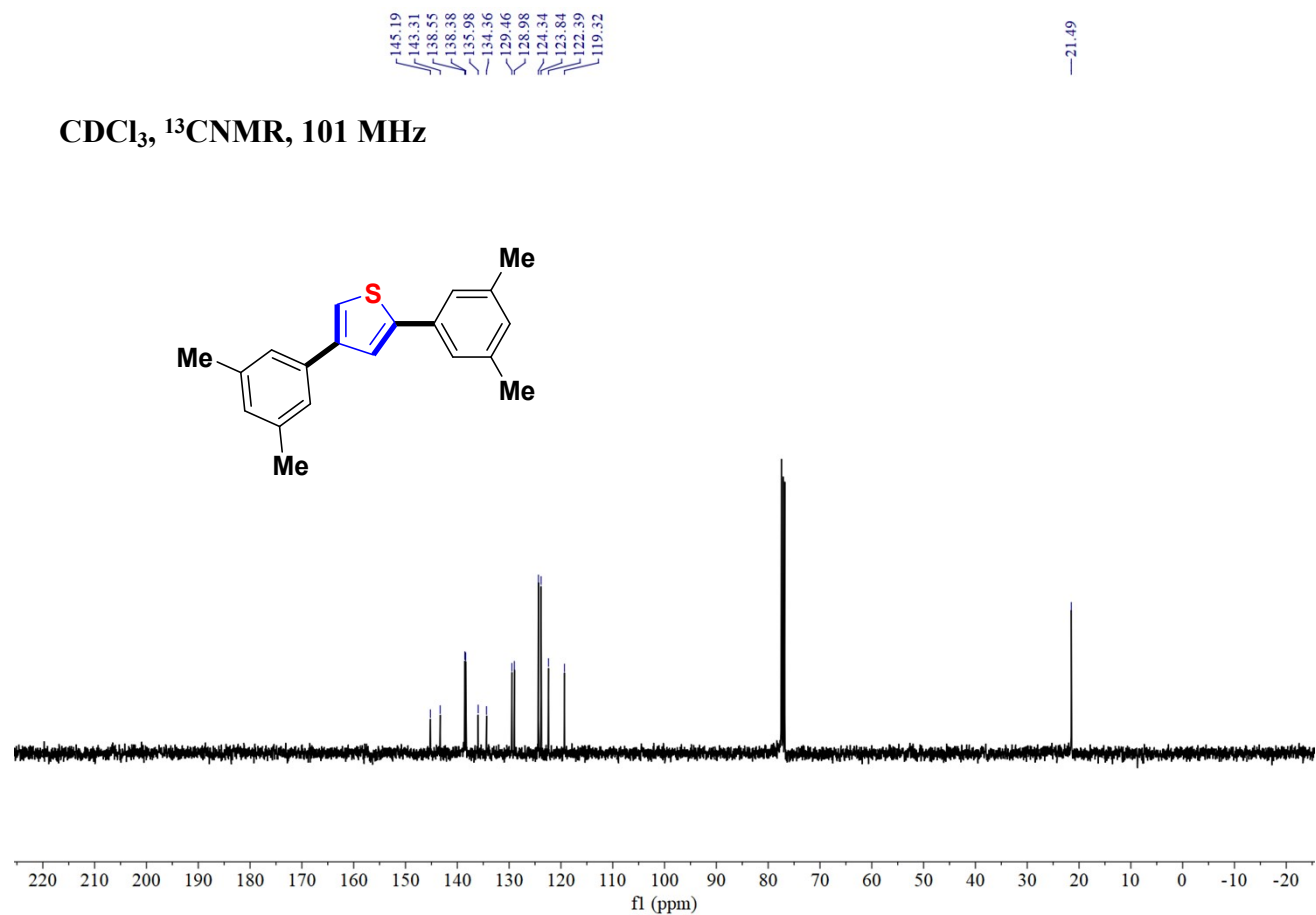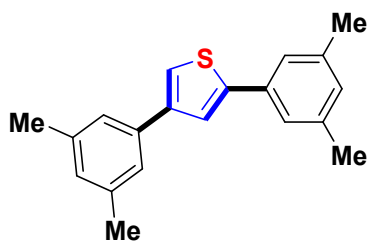

## 2,4-Di-(4-(tert-butylphenyl)-thiophene (2f)

CDCl<sub>3</sub>, <sup>1</sup>HNMR, 400 MHz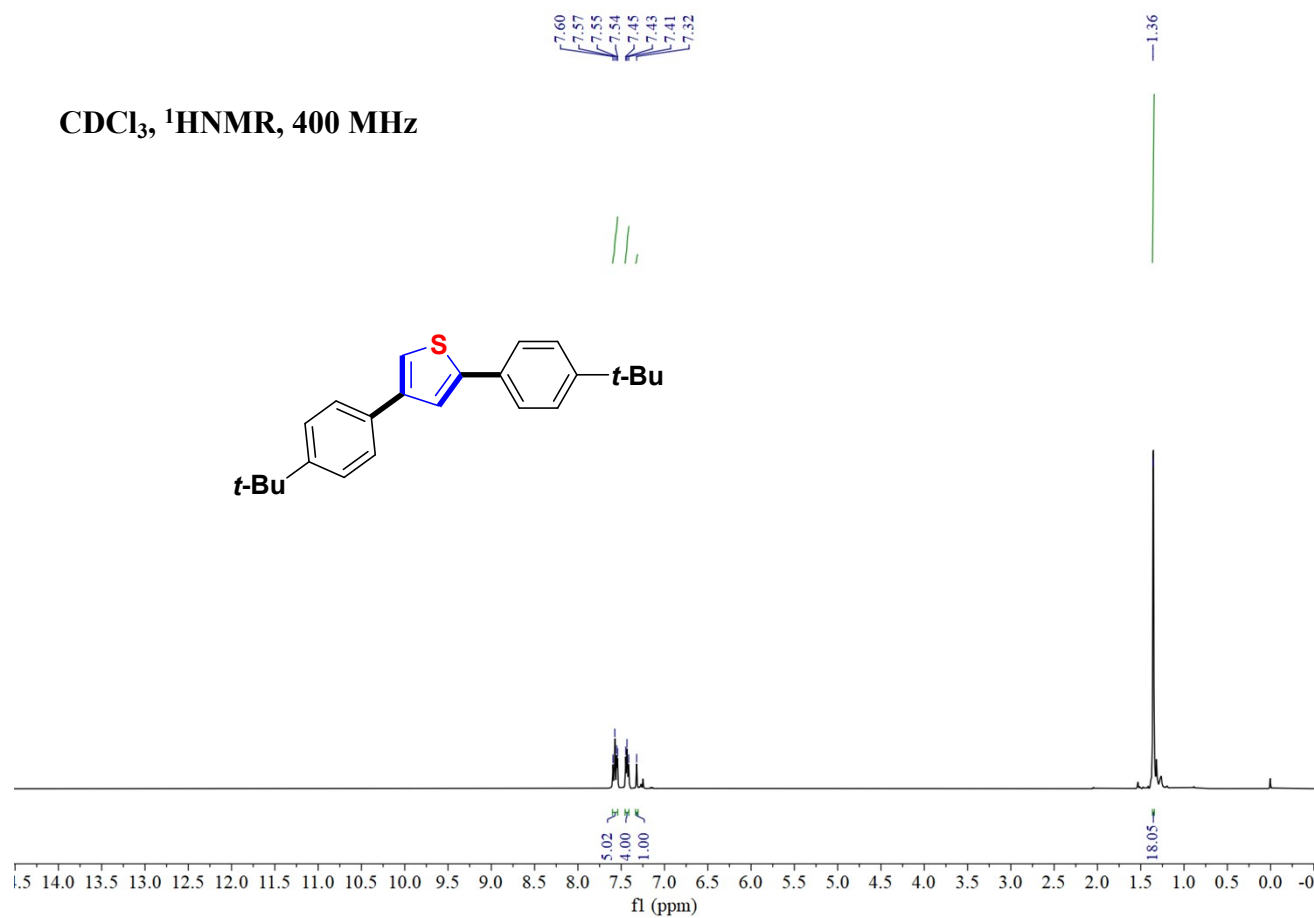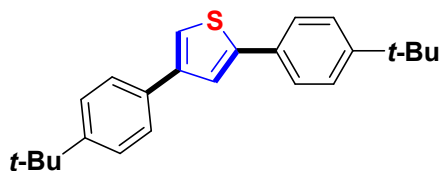CDCl<sub>3</sub>, <sup>13</sup>CNMR, 101 MHz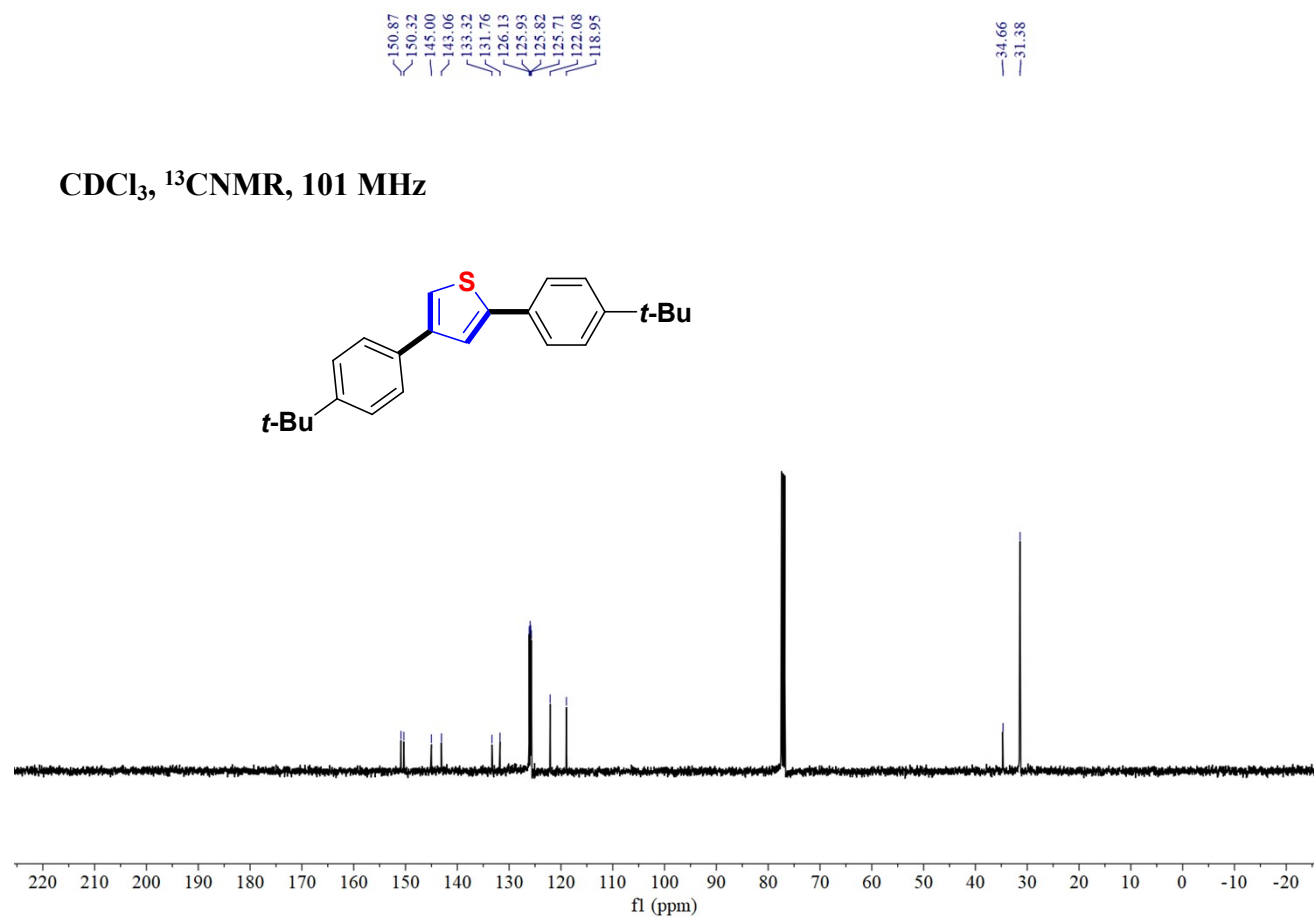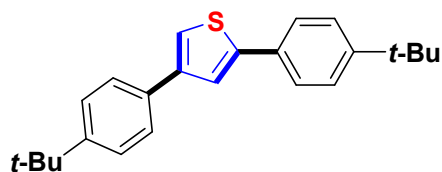

**2,4-Di-(2-methoxyphenyl)-thiophene (2g)**CDCl<sub>3</sub>, <sup>1</sup>HNMR, 400 MHz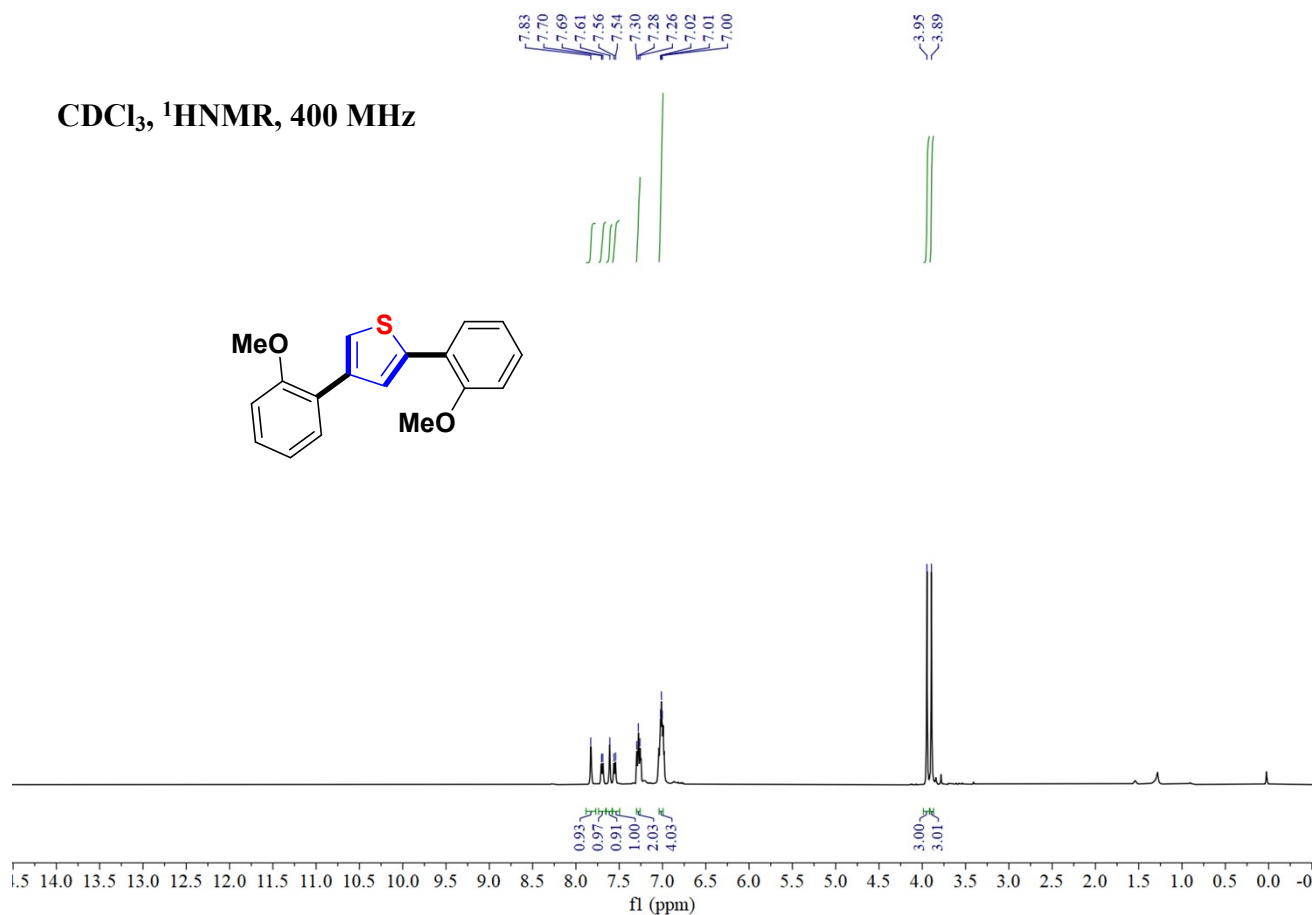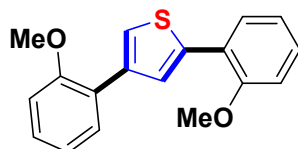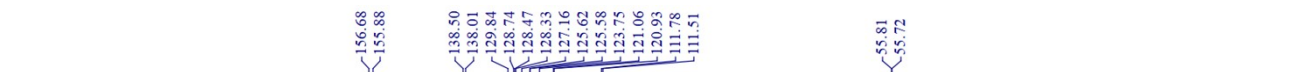CDCl<sub>3</sub>, <sup>13</sup>CNMR, 101 MHz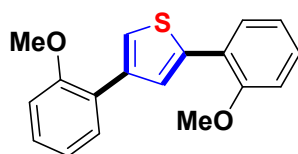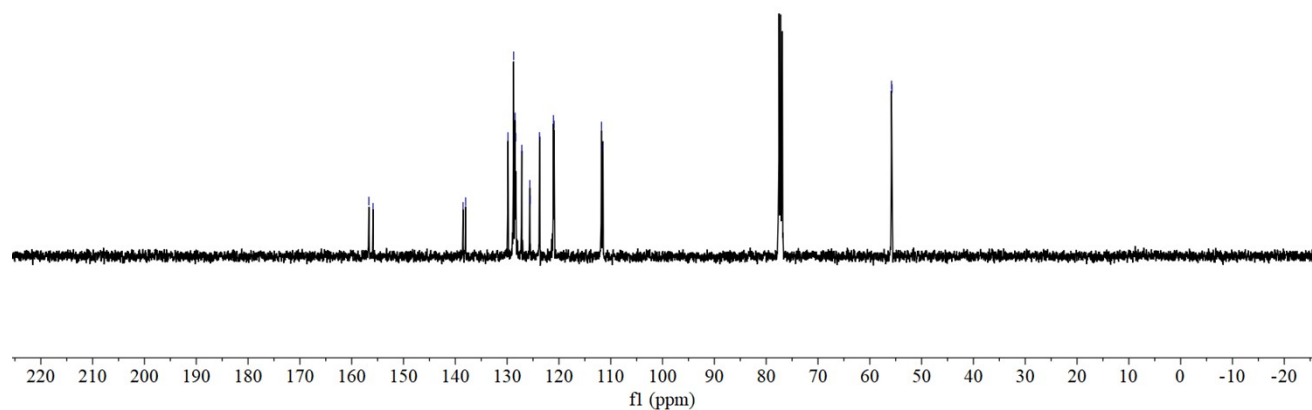

**2,4-Di-(4-trifluoromethoxyphenyl)-thiophene (2h)****CDCl<sub>3</sub>, <sup>1</sup>HNMR, 400 MHz**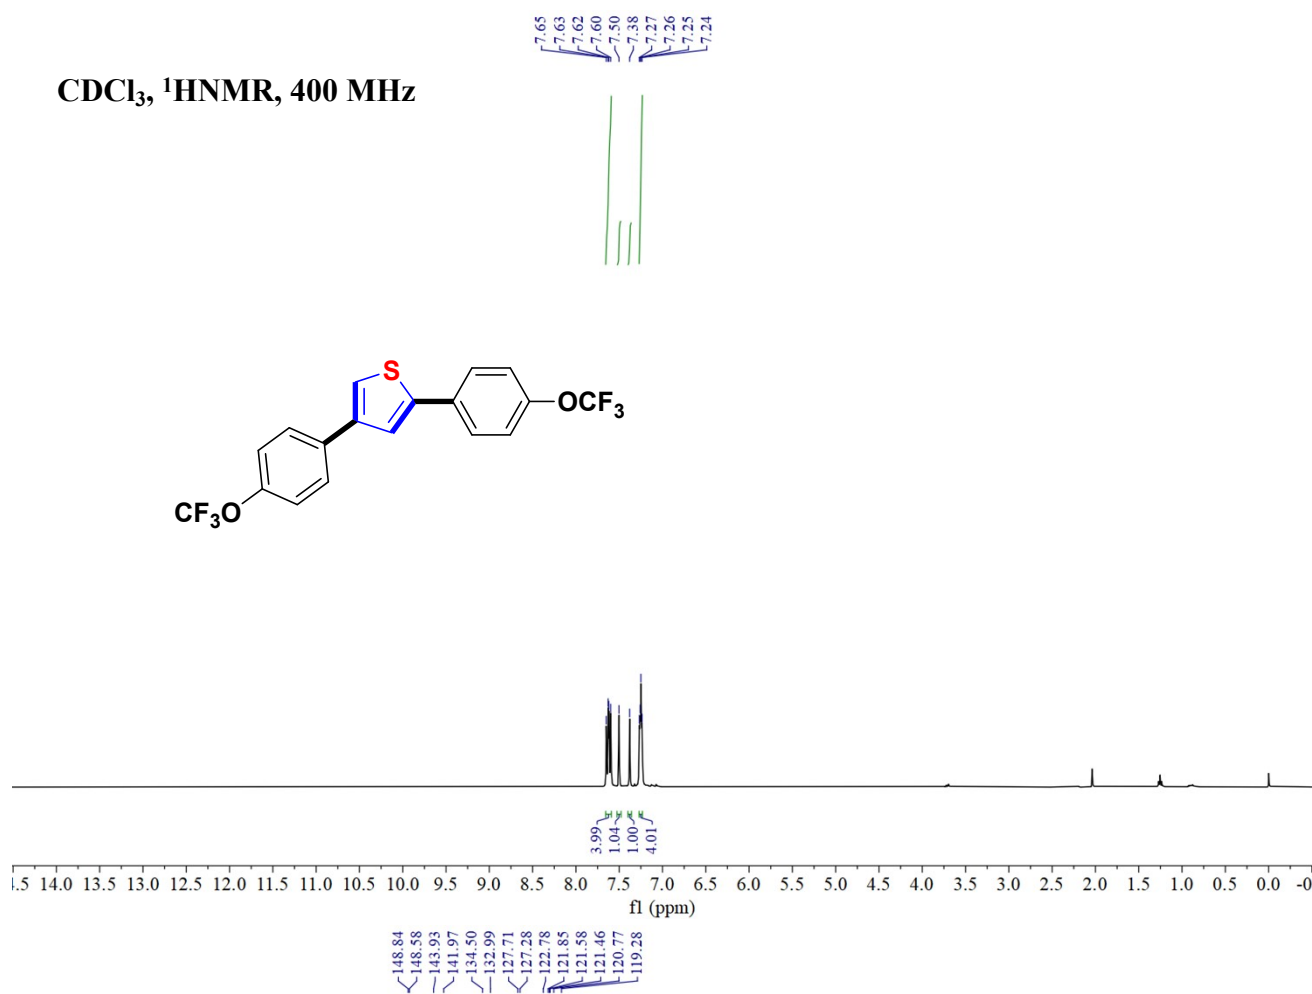**CDCl<sub>3</sub>, <sup>13</sup>CNMR, 101 MHz**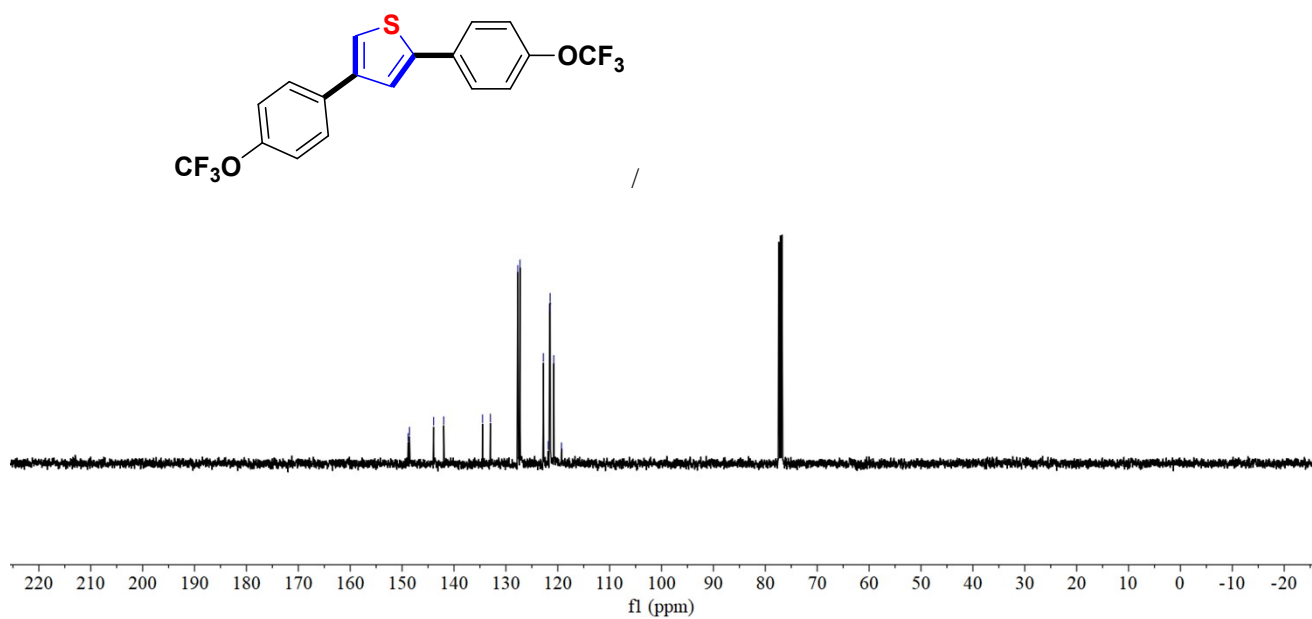

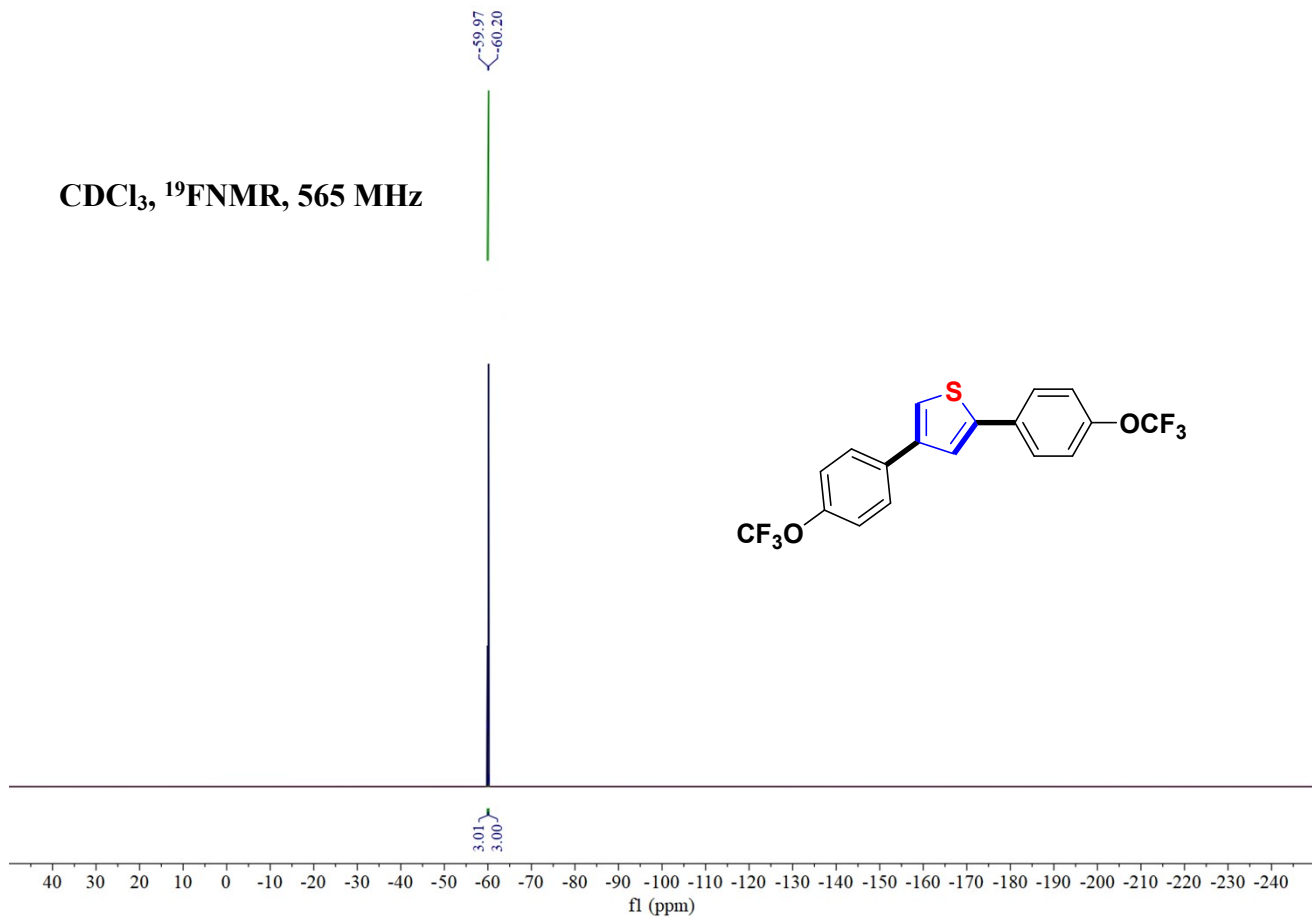

## 2,4-Di-(2-fluorophenyl)-thiophene (2i)

7.80  
7.80  
7.70  
7.70  
7.68  
7.66  
7.66  
7.64  
7.63  
7.63  
7.62  
7.60  
7.59  
7.28  
7.22  
7.22  
7.21  
7.20  
7.20  
7.20  
7.19  
7.19  
7.18  
7.17  
7.17  
7.16  
7.16  
7.15  
7.15  
7.14  
7.14

CDCl<sub>3</sub>, <sup>1</sup>HNMR, 400 MHz

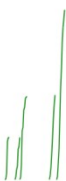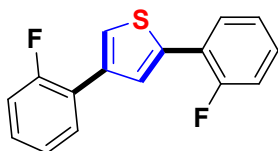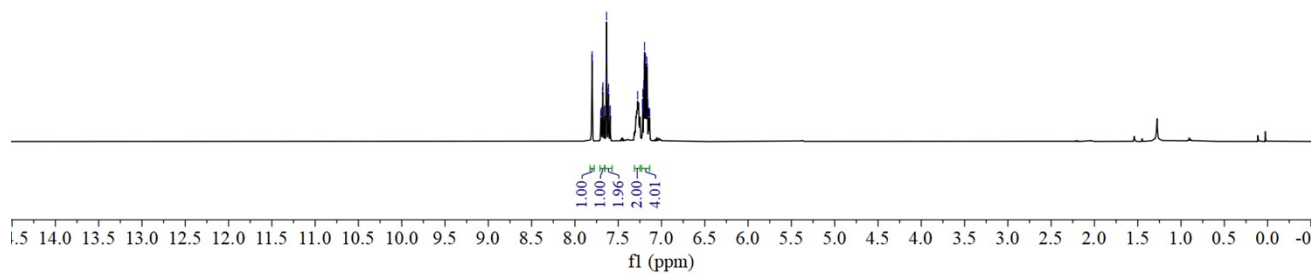

161.16  
160.47  
158.69  
157.98  
137.22  
136.28  
129.52  
129.48  
129.04  
128.96  
128.85  
128.81  
128.77  
126.85  
126.82  
126.79  
126.75  
124.61  
124.58  
124.50  
124.47  
124.07  
124.02  
123.99  
123.95  
123.73  
123.60  
122.22  
122.09  
116.60  
116.50  
116.37  
116.28

CDCl<sub>3</sub>, <sup>13</sup>CNMR, 101 MHz

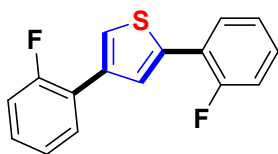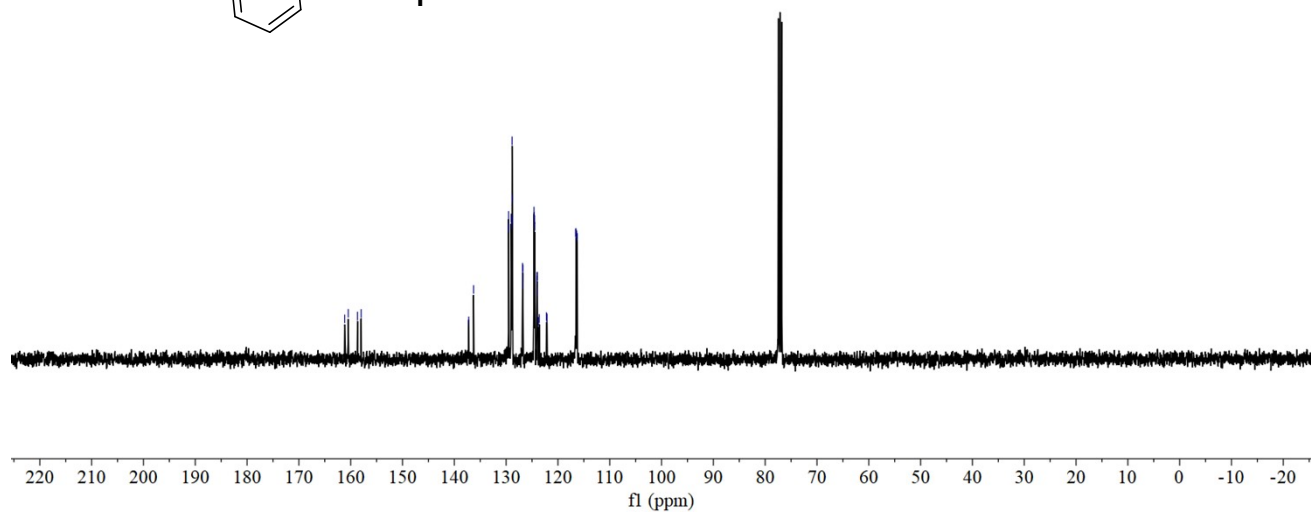



$\text{CDCl}_3$ ,  $^{19}\text{F}$ NMR, 565 MHz

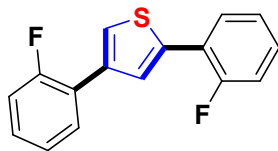

-108.32  
-108.42

1.00  
1.00

40 30 20 10 0 -10 -20 -30 -40 -50 -60 -70 -80 -90 -100 -110 -120 -130 -140 -150 -160 -170 -180 -190 -200 -210 -220 -230 -240  
f1 (ppm)

**2,4-Di-(3,4,5-trifluorophenyl)-thiophene (2j)**7.39  
7.25  
7.25  
7.24  
7.24  
7.23  
7.23  
7.22  
7.21  
7.21  
7.20  
7.18  
7.18  
7.17  
7.16**CDCl<sub>3</sub>, <sup>1</sup>H NMR, 400 MHz**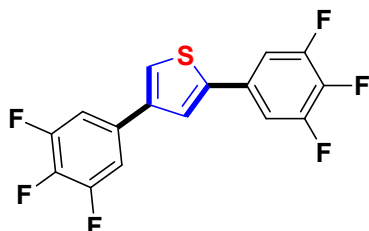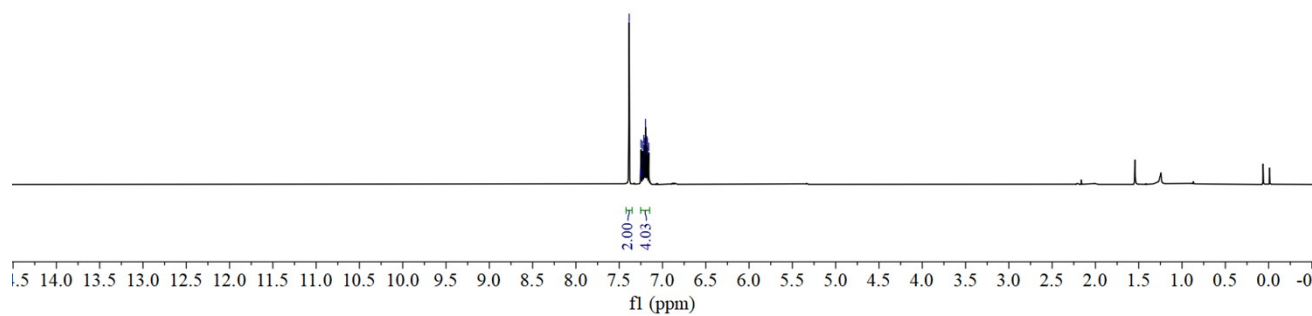152.80  
150.41  
150.31  
142.65  
140.50  
131.49  
130.06  
123.02  
122.03  
110.56  
110.50  
110.40  
110.34  
110.23  
110.16  
110.07  
110.00**CDCl<sub>3</sub>, <sup>13</sup>C NMR, 101 MHz**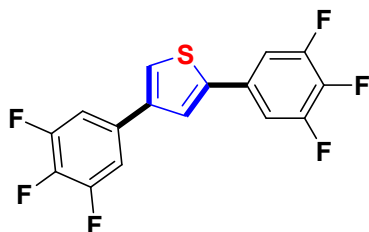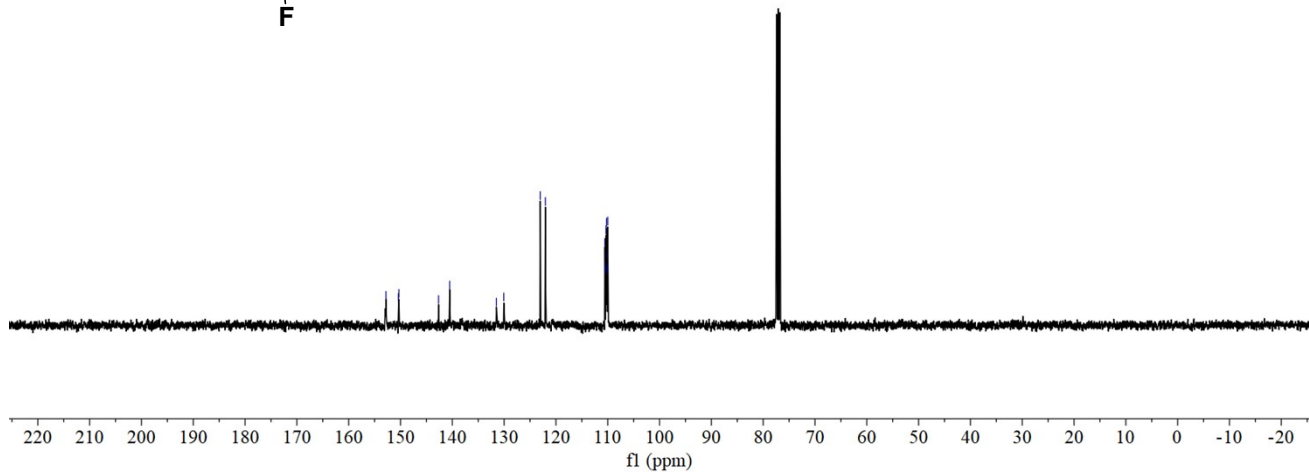

$\text{CDCl}_3$ ,  $^{19}\text{F}$ NMR, 565 MHz

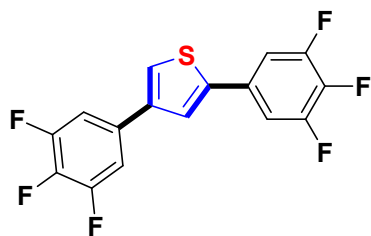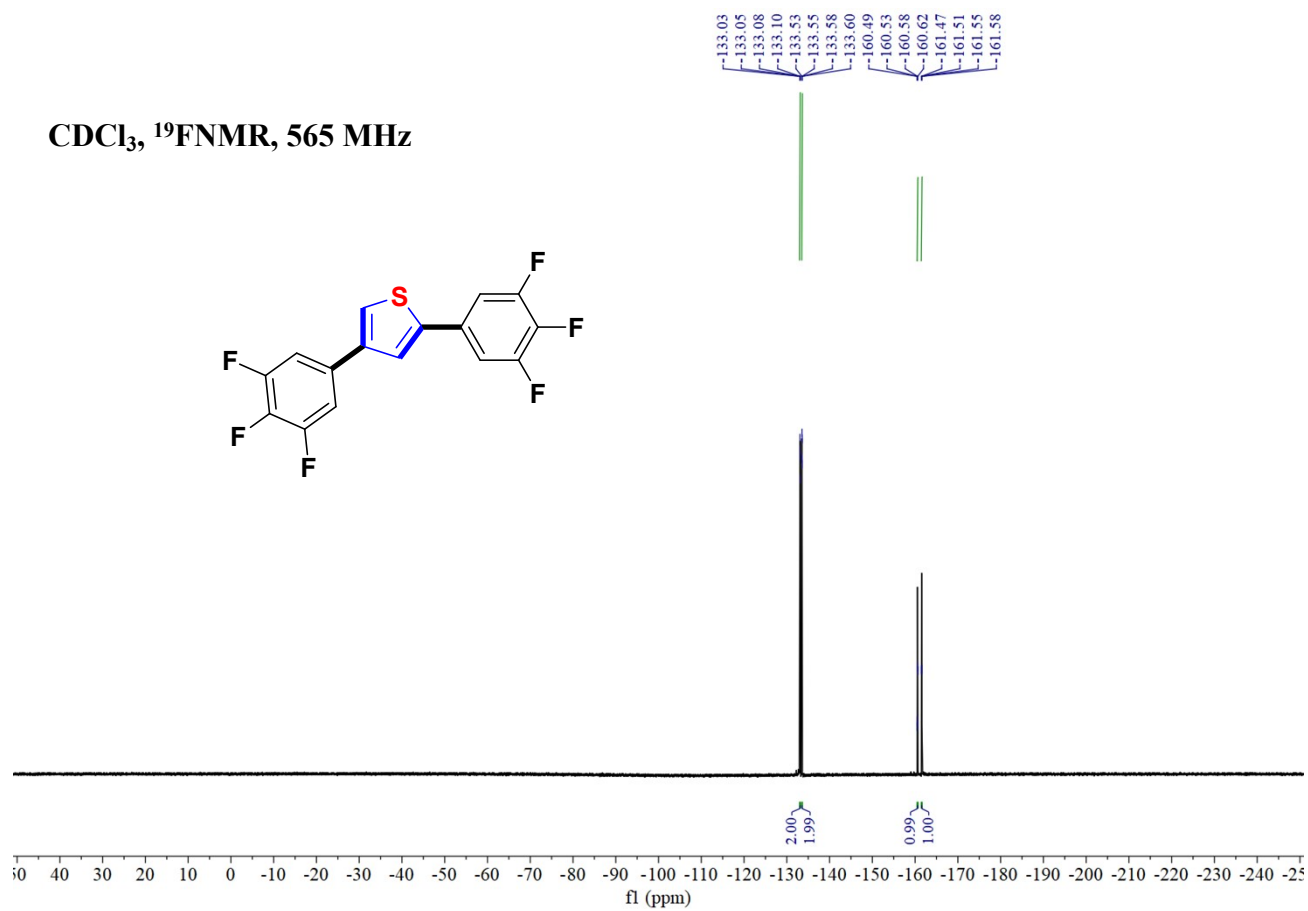

## 2,4-Di-(4-fluorophenyl)-thiophene (2k)

7.61  
7.60  
7.59  
7.58  
7.57  
7.56  
7.56  
7.55  
7.54  
7.44  
7.30  
7.11  
7.11  
7.09  
7.09  
7.07  
7.07CDCl<sub>3</sub>, <sup>1</sup>HNMR, 400 MHz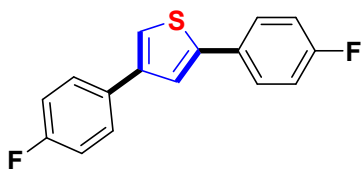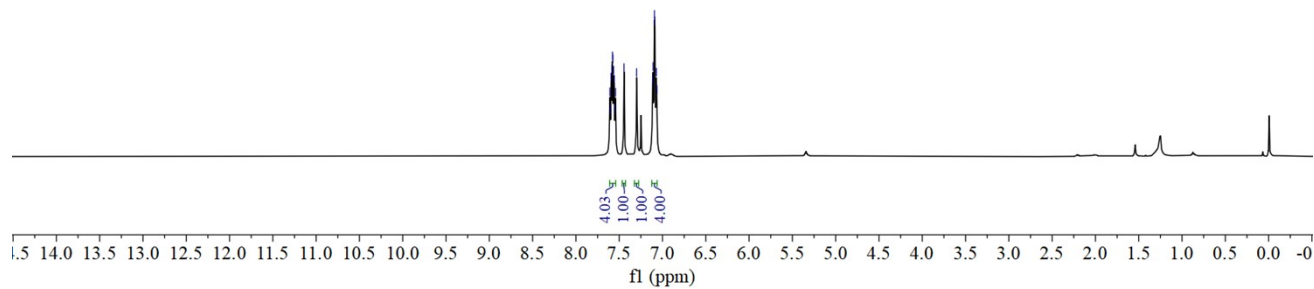163.80  
163.72  
161.35  
144.28  
142.26  
132.08  
130.68  
130.61  
128.02  
127.94  
127.69  
127.61  
122.36  
119.49  
116.23  
116.13  
115.92  
115.72CDCl<sub>3</sub>, <sup>13</sup>CNMR, 101 MHz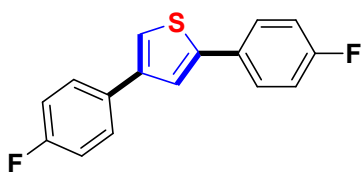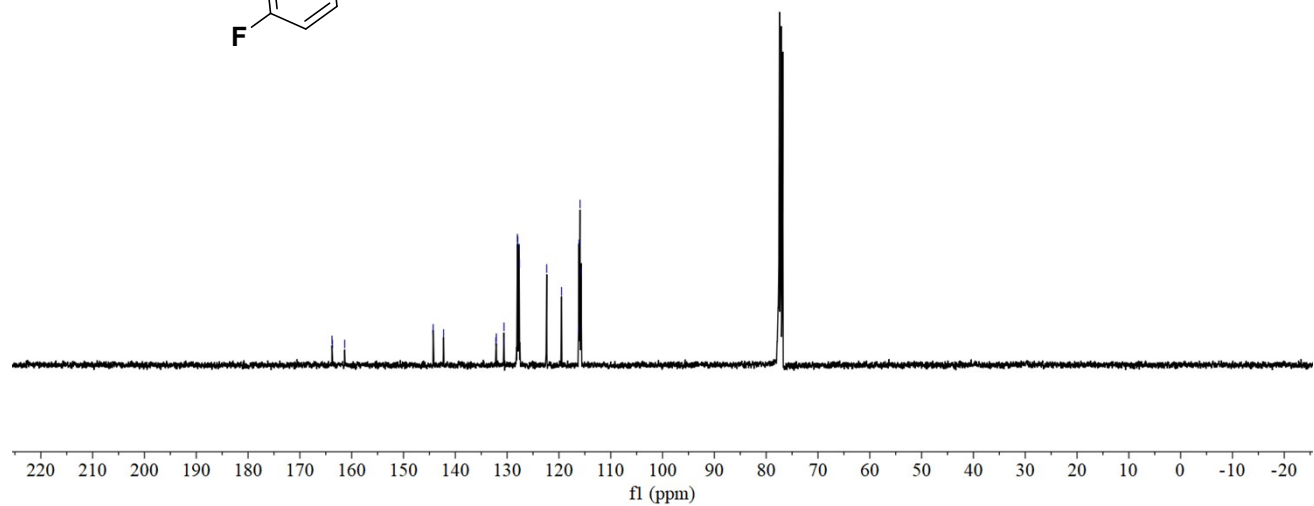

$\text{CDCl}_3$ ,  $^{19}\text{F}$ NMR, 565 MHz

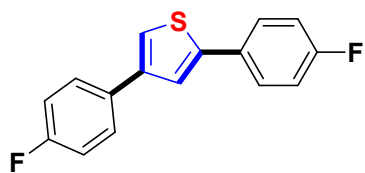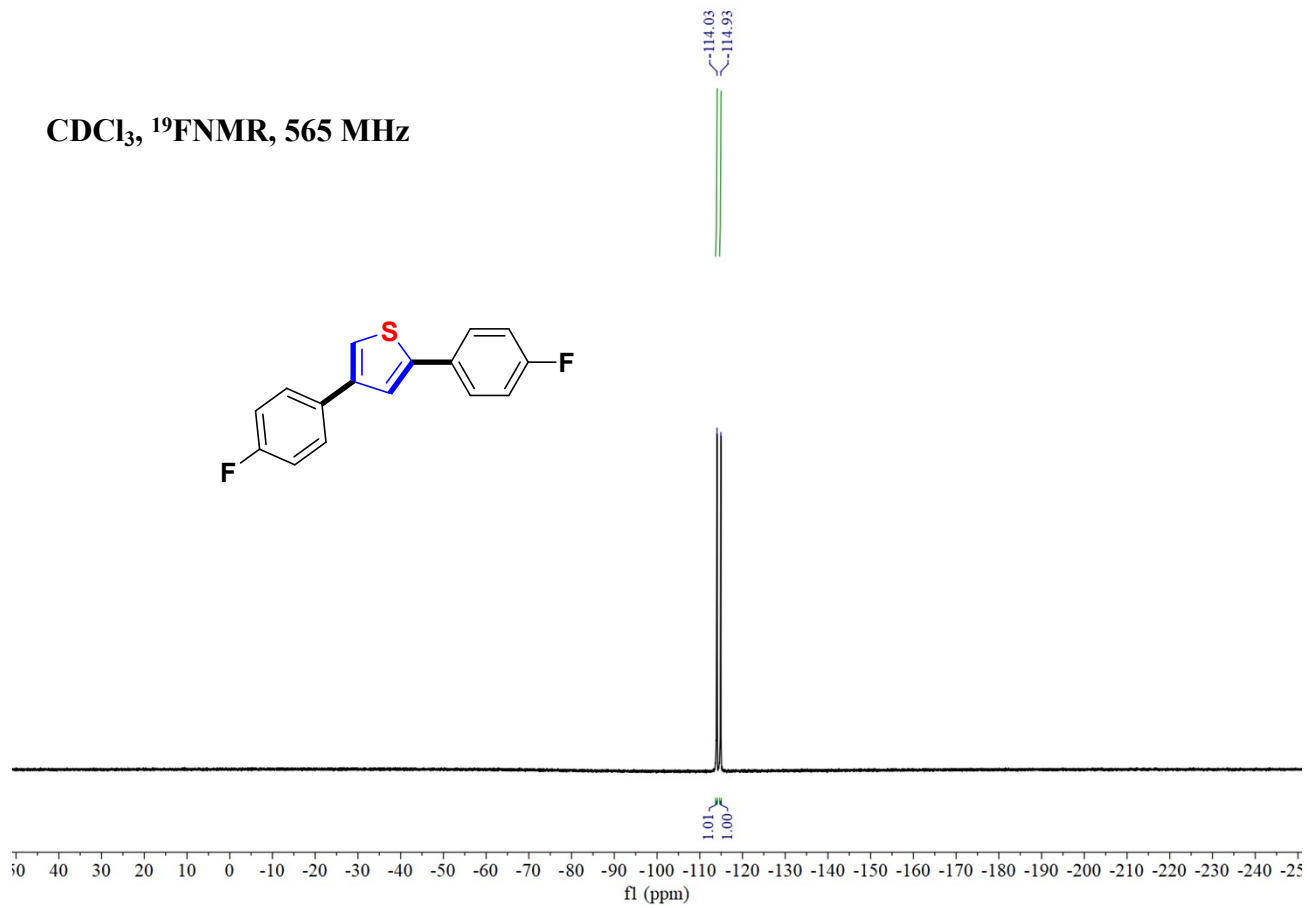

**2,4-Di-(3-fluorophenyl)-thiophene (2l)**

7.55  
7.55  
7.42  
7.41  
7.40  
7.38  
7.38  
7.37  
7.36  
7.35  
7.34  
7.34  
7.32  
7.31  
7.31  
7.28  
7.28  
7.03  
7.02  
7.02  
7.01  
7.01  
7.00  
6.99  
6.99  
6.98

**CDCl<sub>3</sub>, <sup>1</sup>H NMR, 400 MHz**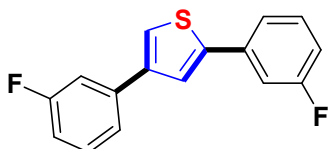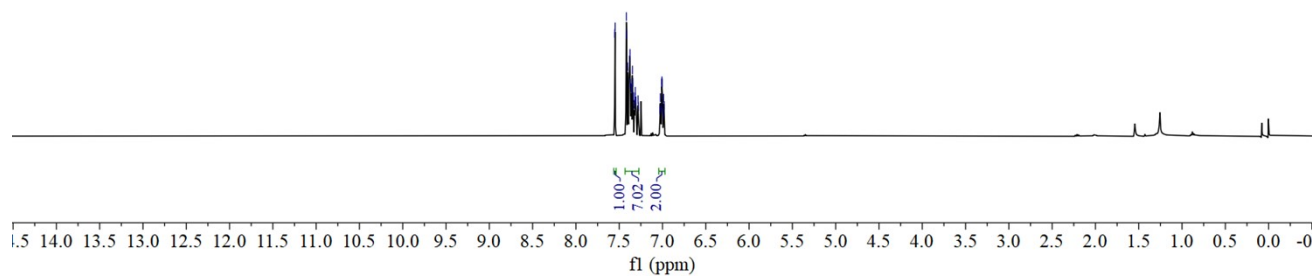

164.53  
164.47  
162.09  
162.02  
144.05  
142.07  
137.87  
137.79  
136.33  
136.25  
130.65  
130.57  
130.51  
130.42  
122.87  
122.05  
122.02  
121.64  
121.61  
121.09  
114.81  
114.60  
114.39  
114.18  
113.41  
113.18  
112.92  
112.69

**CDCl<sub>3</sub>, <sup>13</sup>C NMR, 101 MHz**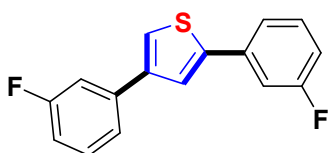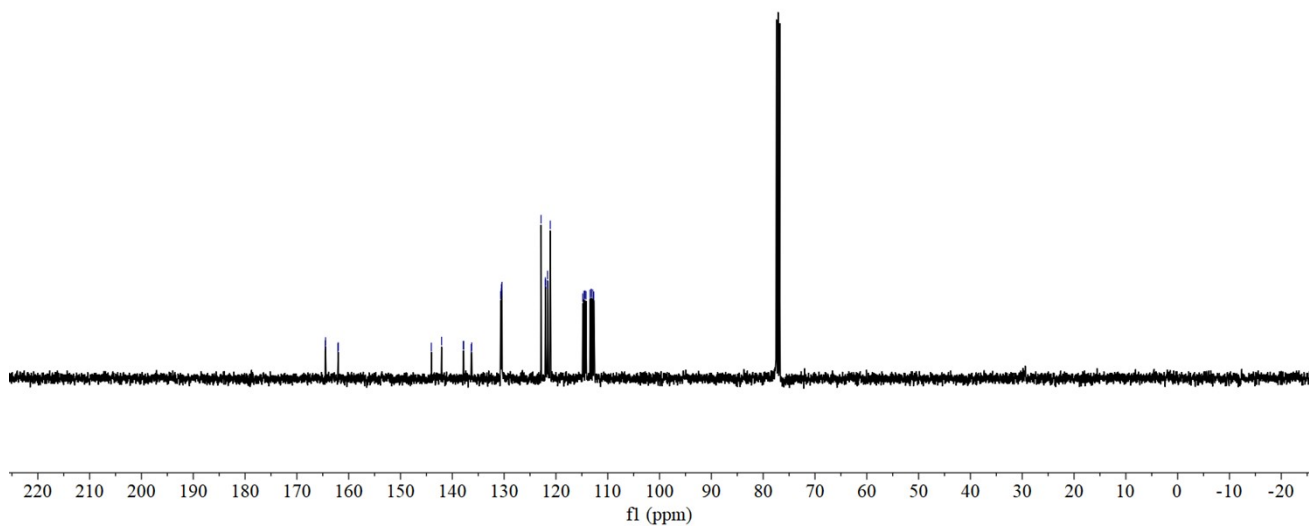

$\text{CDCl}_3$ ,  $^{19}\text{F}$ NMR, 565 MHz

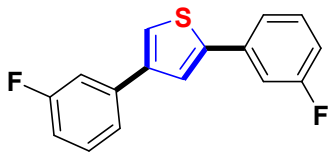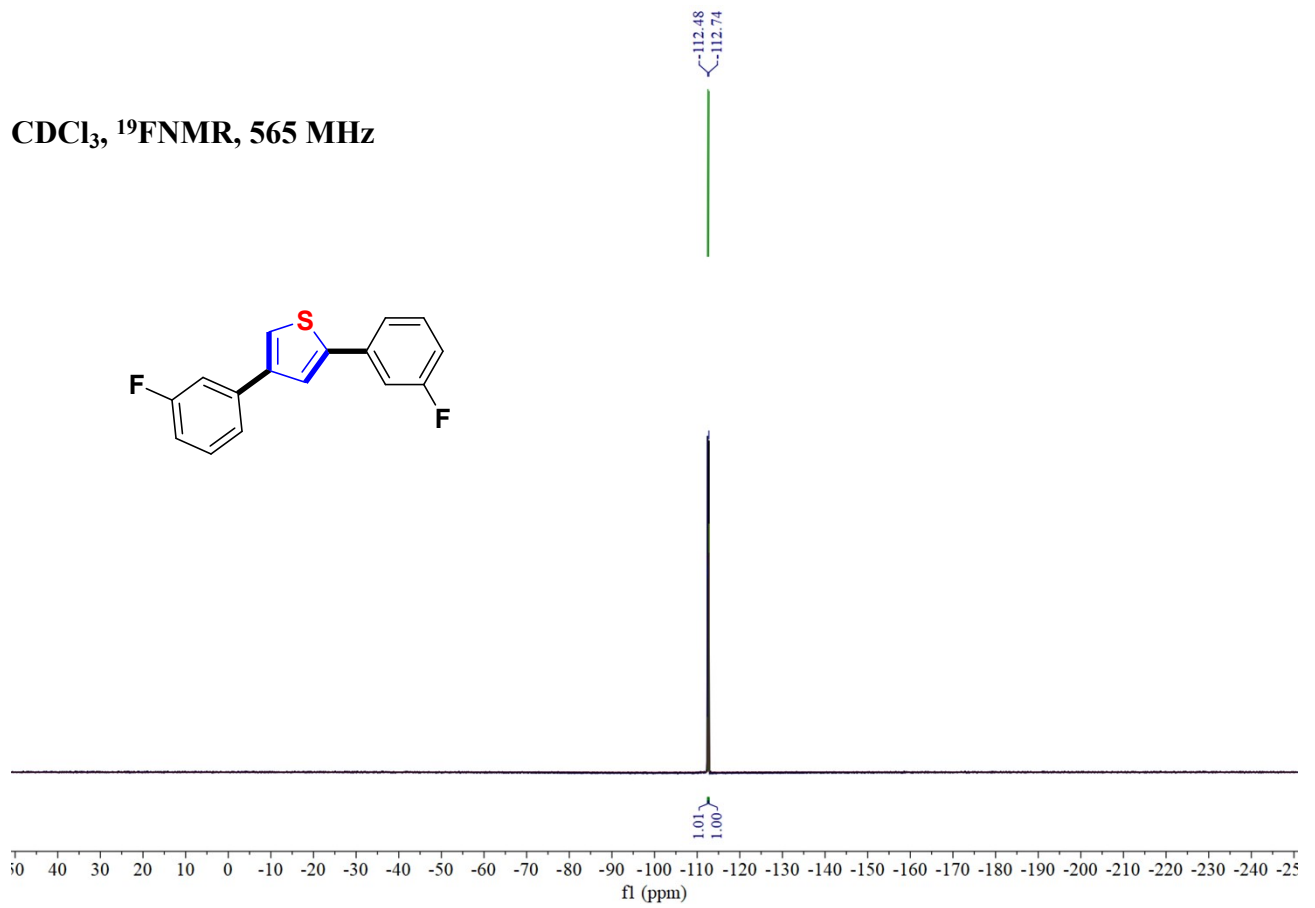

**2,4-Di-(2-chlorophenyl)-thiophene (2m)**

7.62  
7.60  
7.58  
7.51  
7.49  
7.48  
7.47  
7.47  
7.33  
7.31  
7.29  
7.27  
7.25

$\text{CDCl}_3$ ,  $^1\text{H NMR}$ , 400 MHz

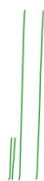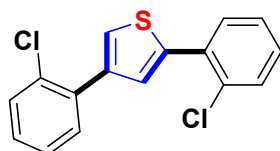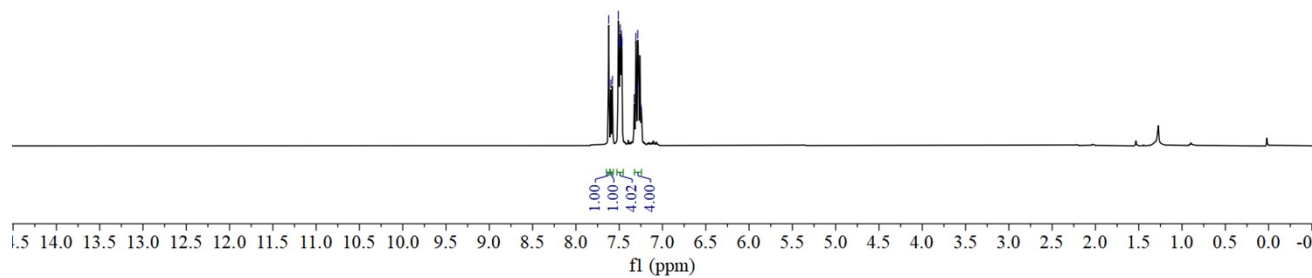

139.68  
139.45  
135.27  
133.06  
132.53  
132.45  
131.46  
131.19  
130.71  
130.38  
129.56  
128.89  
128.65  
127.11  
127.04  
125.00

$\text{CDCl}_3$ ,  $^{13}\text{C NMR}$ , 101 MHz

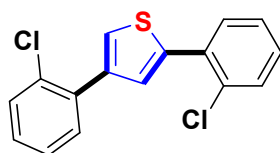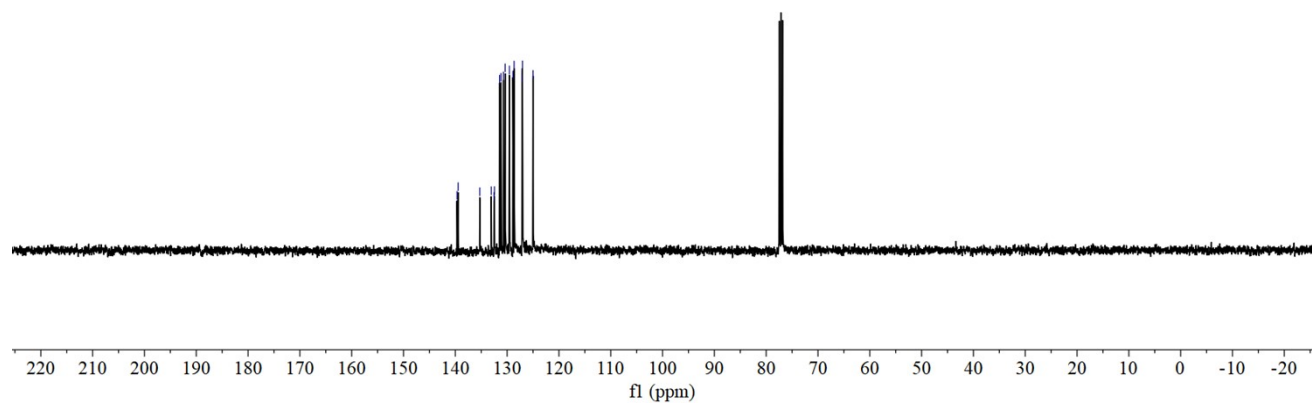



**2,4-Di-(3-chlorophenyl)-thiophene (2n)**

7.62  
7.58  
7.53  
7.51  
7.48  
7.46  
7.41  
7.35  
7.34  
7.33  
7.32  
7.30  
7.29  
7.26  
7.25

**CDCl<sub>3</sub>, <sup>1</sup>HNMR, 400 MHz**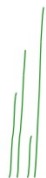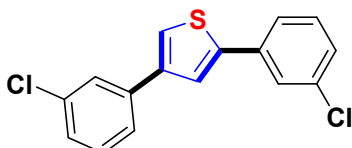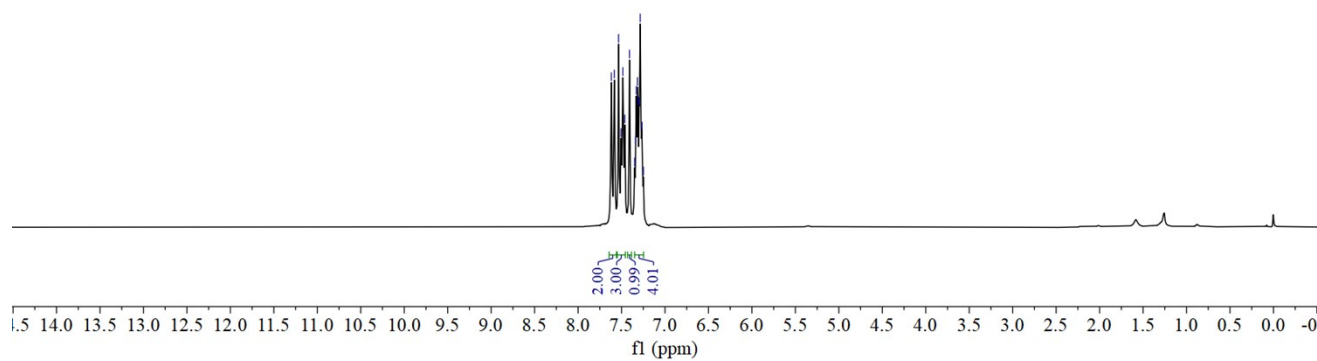

143.84  
141.88  
137.40  
135.87  
135.01  
134.88  
130.29  
130.19  
127.86  
127.44  
126.51  
125.91  
124.46  
124.06  
122.86  
121.21

**CDCl<sub>3</sub>, <sup>13</sup>CNMR, 101 MHz**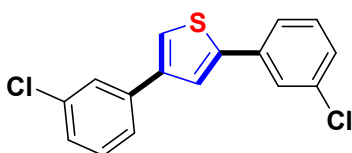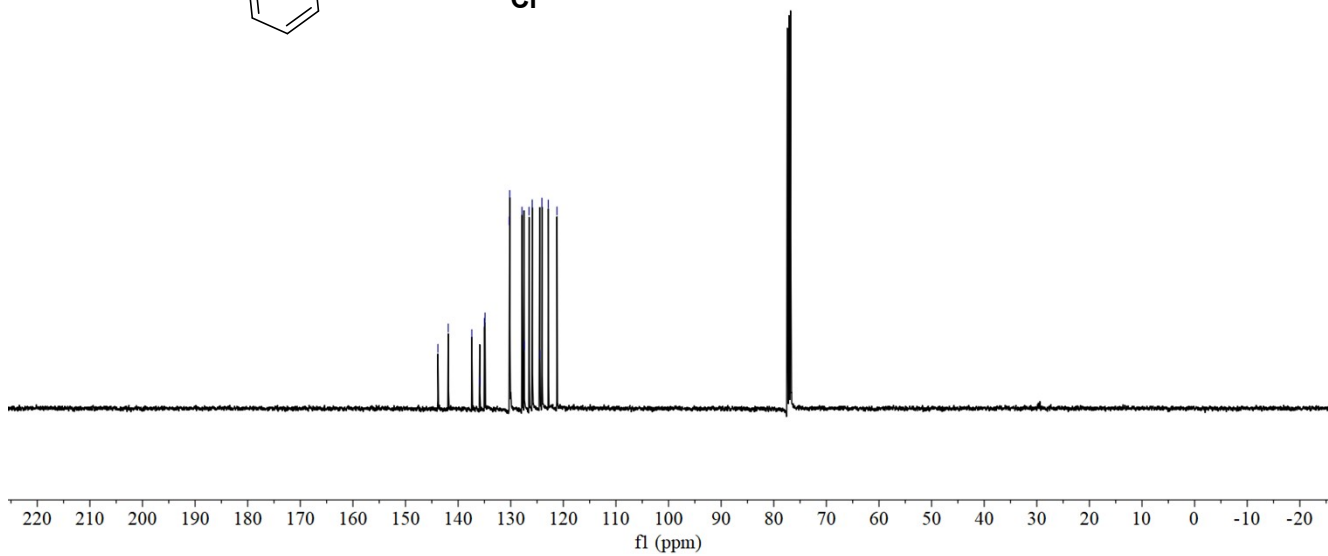

**2,4-Di-(4-bromophenyl)-thiophene (2o)**

7.54  
7.53  
7.53  
7.52  
7.51  
7.51  
7.50  
7.49  
7.47  
7.46  
7.45  
7.44  
7.38

**CDCl<sub>3</sub>, <sup>1</sup>H NMR, 400 MHz**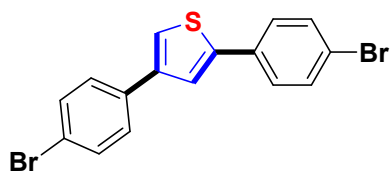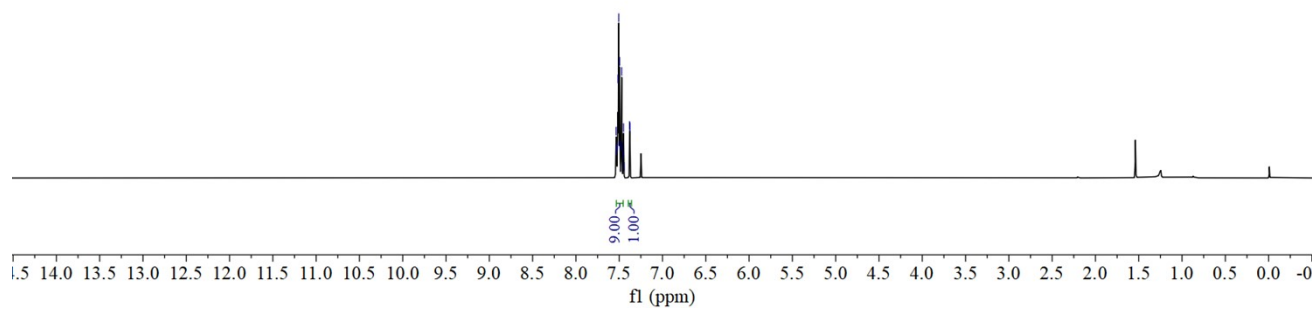

144.21  
142.17  
134.64  
133.16  
132.16  
132.06  
127.94  
127.41  
122.46  
121.81  
121.41  
120.43

**CDCl<sub>3</sub>, <sup>13</sup>C NMR, 101 MHz**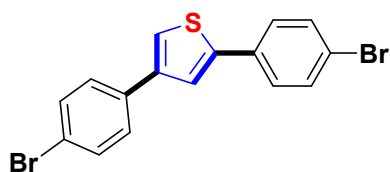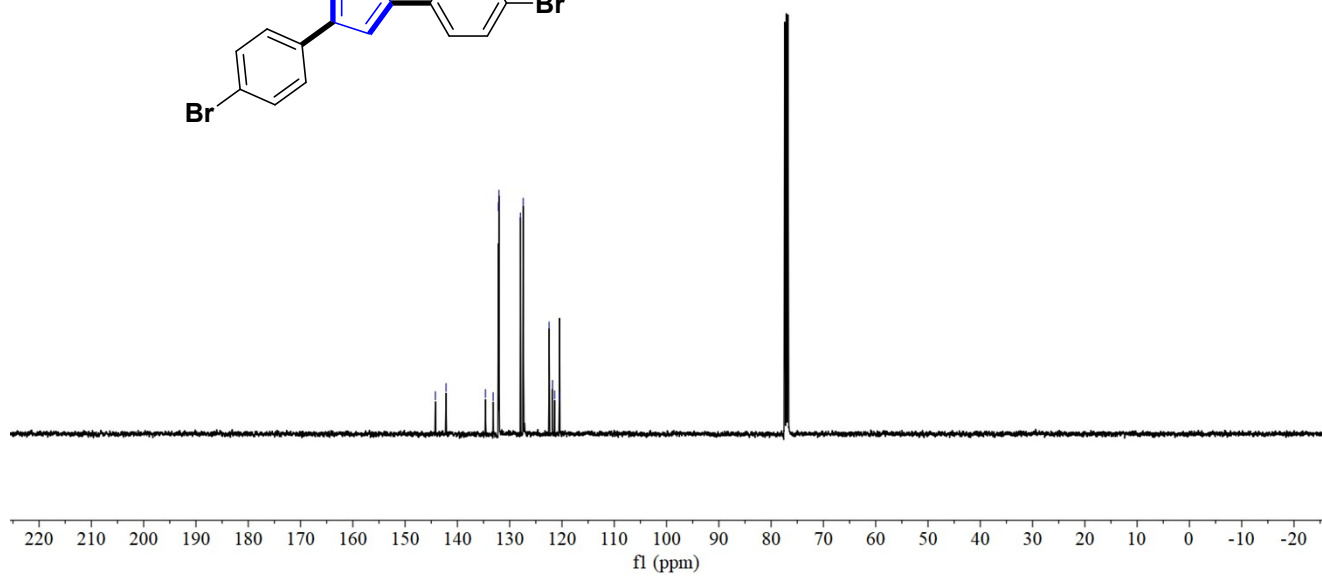

**2,4-Di-(2-bromophenyl)-thiophene (2p)**

7.70  
7.68  
7.66  
7.55  
7.55  
7.53  
7.53  
7.52  
7.52  
7.46  
7.46  
7.44  
7.44  
7.36  
7.34  
7.32  
7.31  
7.20  
7.18  
7.17

$\text{CDCl}_3$ ,  $^1\text{H NMR}$ , 400 MHz

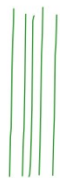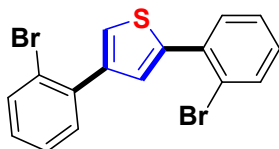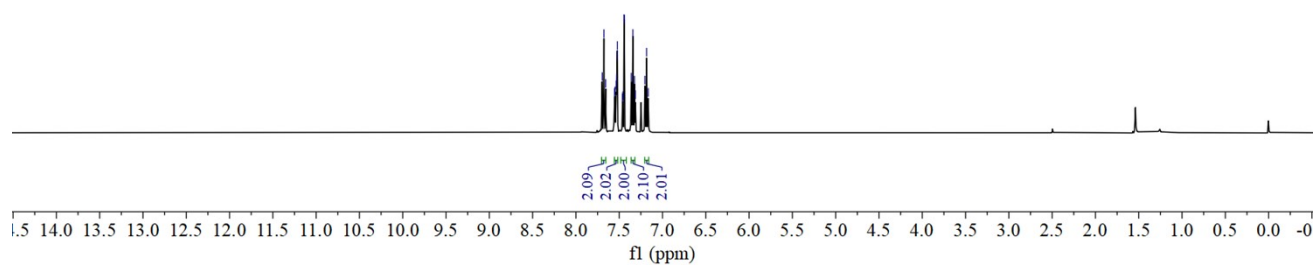

141.14  
141.01  
137.45  
135.15  
133.89  
133.53  
131.99  
131.38  
129.73  
129.23  
128.90  
127.59  
127.56  
124.69  
122.88  
122.61

$\text{CDCl}_3$ ,  $^{13}\text{C NMR}$ , 101 MHz

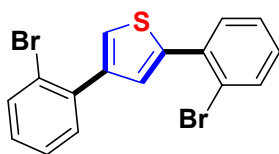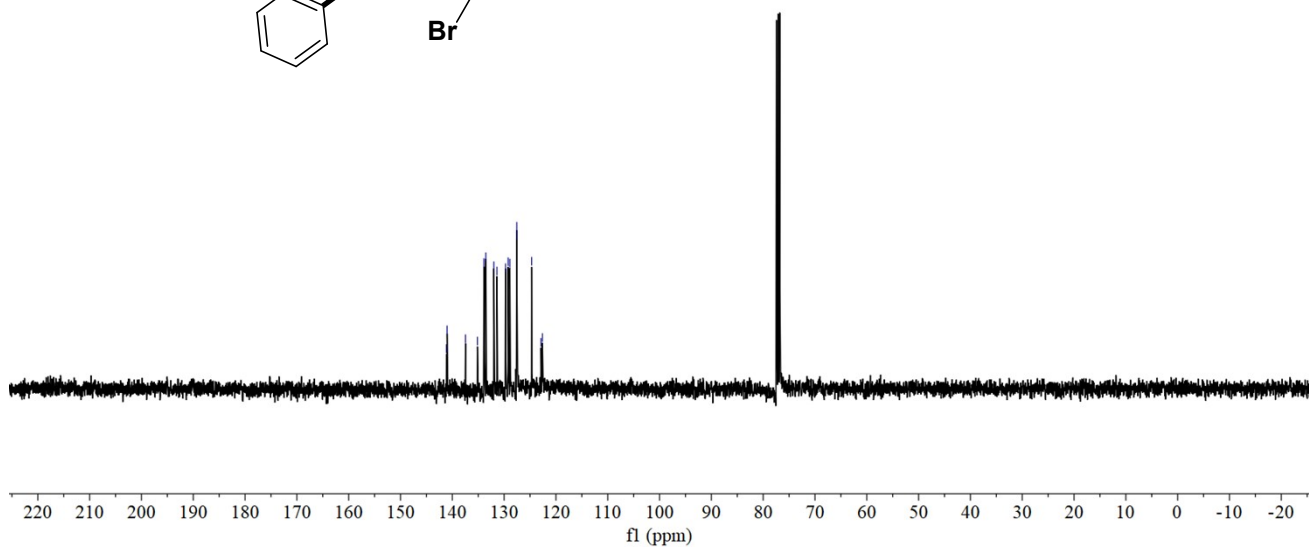

**2,4-Di-(3-trifluoromethyl)-thiophene (2q)**CDCl<sub>3</sub>, <sup>1</sup>HNMR, 400 MHz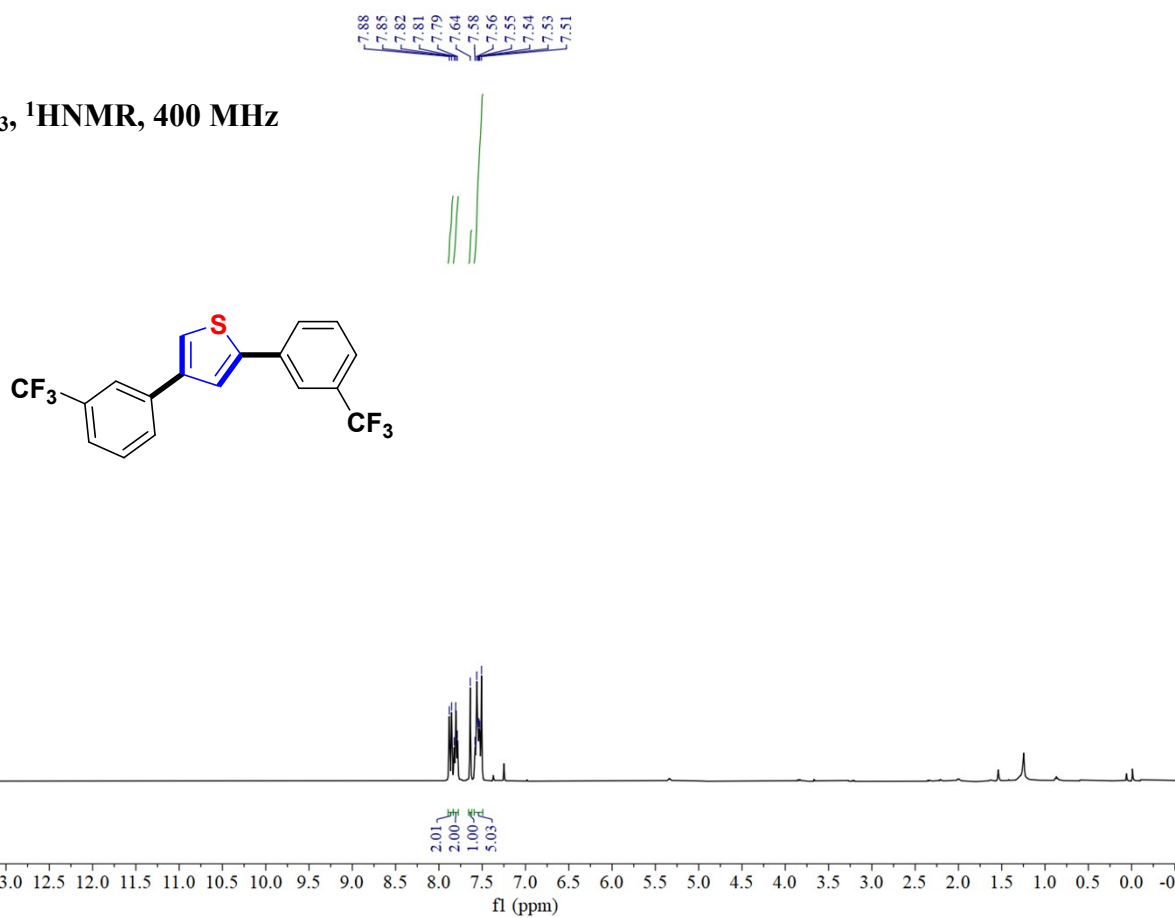CDCl<sub>3</sub>, <sup>13</sup>CNMR, 101 MHz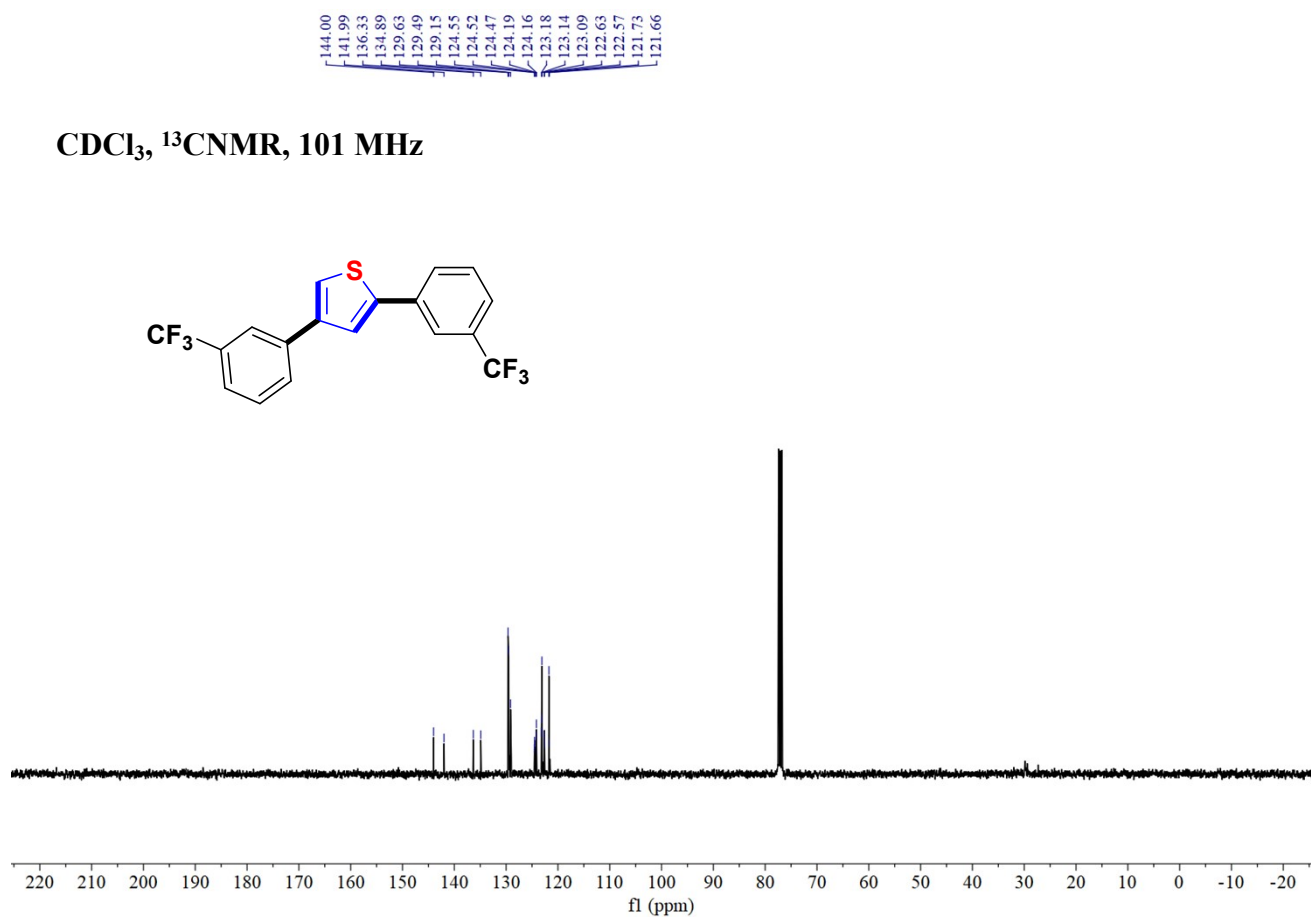

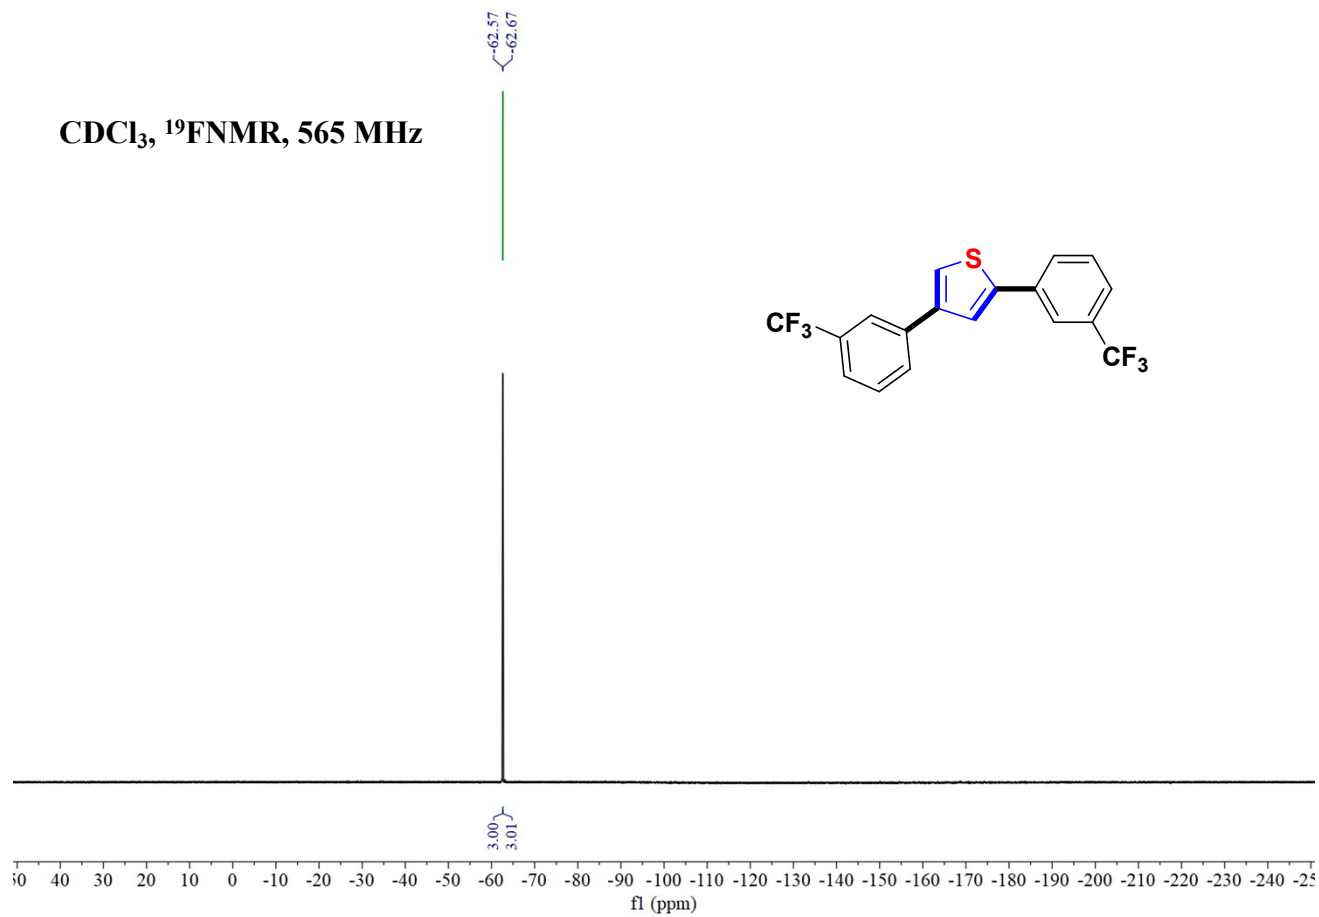

**2,4-Di-(4-trifluoromethyl)-thiophene (2r)****CDCl<sub>3</sub>, <sup>1</sup>HNMR, 400 MHz**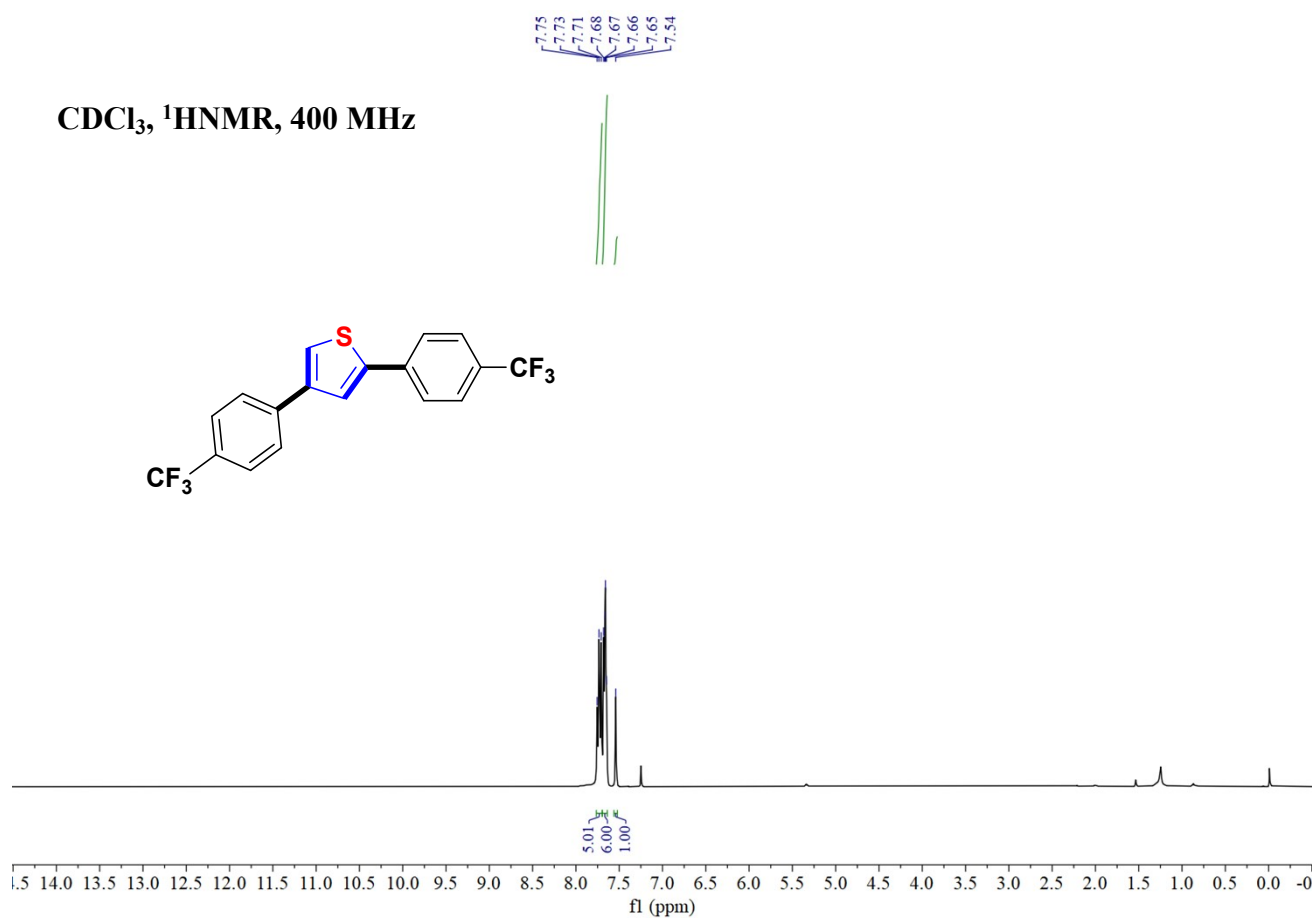**CDCl<sub>3</sub>, <sup>13</sup>CNMR, 101 MHz**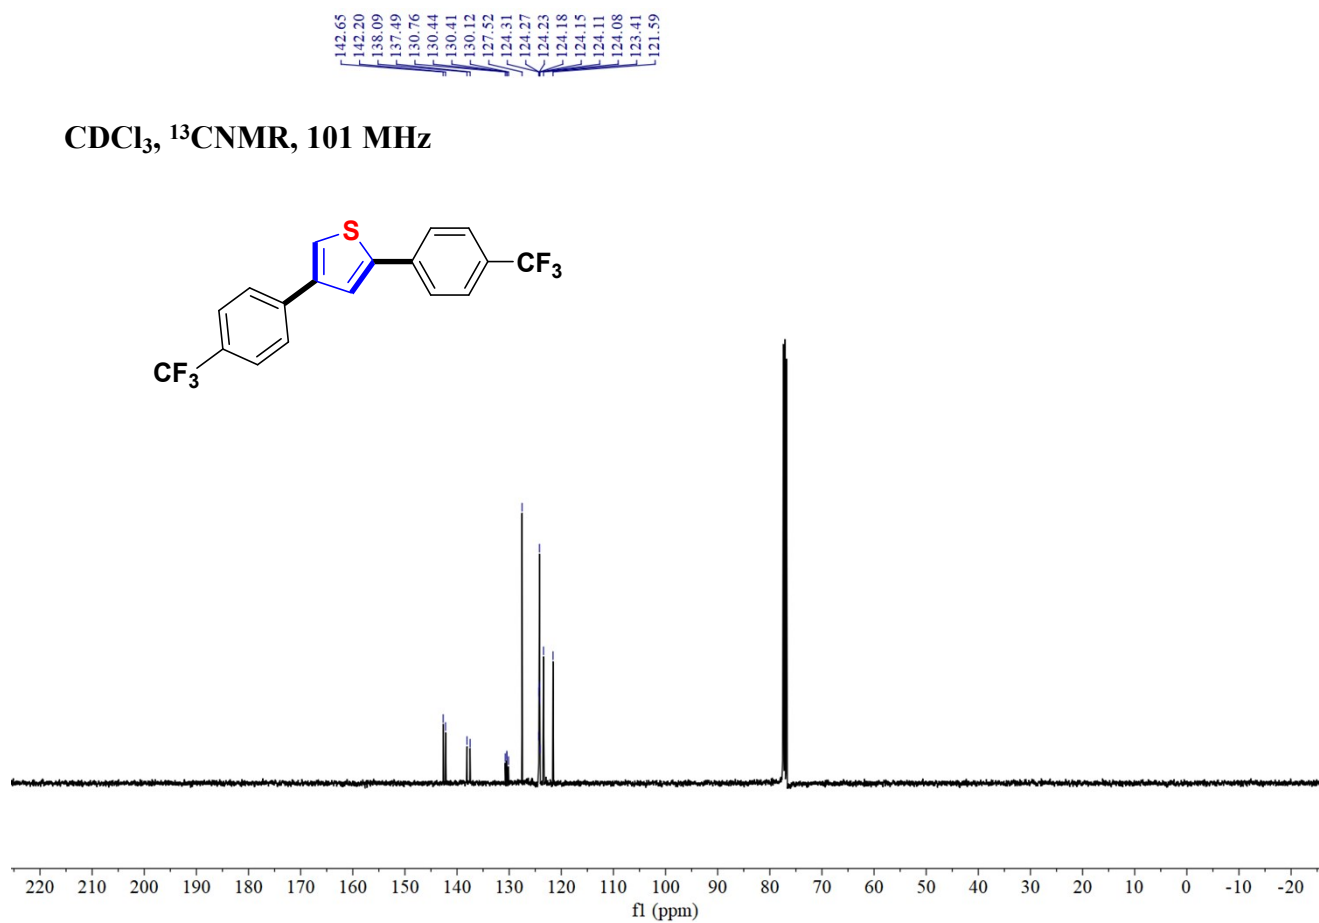

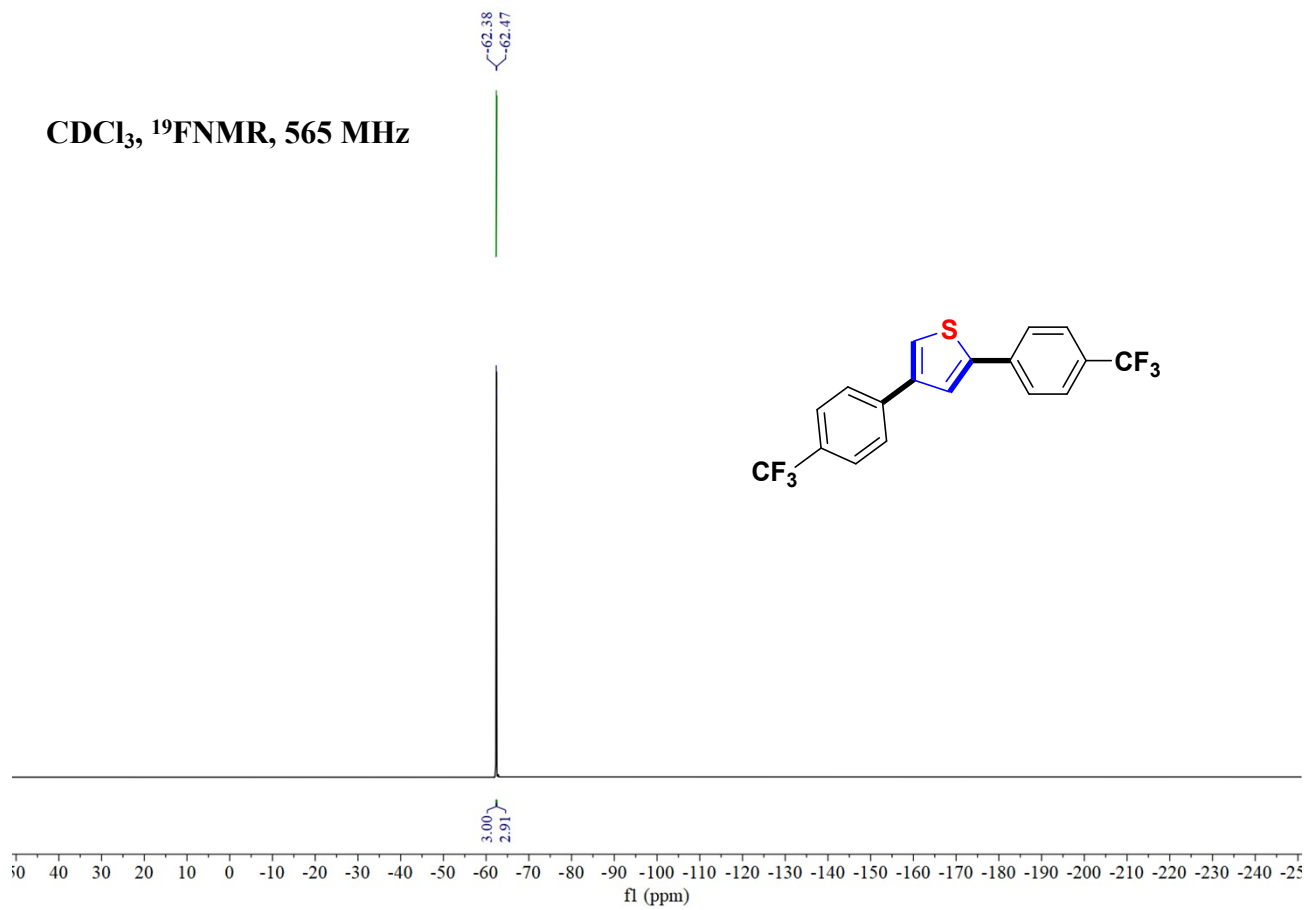

**2,4-Di-(naphthalen-1-yl)-thiophene (2s)**

8.41  
8.40  
8.39  
8.38  
8.37  
8.37  
8.24  
8.22  
8.21  
8.21  
7.94  
7.93  
7.92  
7.91  
7.90  
7.90  
7.88  
7.86  
7.70  
7.70  
7.68  
7.68  
7.62  
7.61  
7.60  
7.60  
7.56  
7.55  
7.55  
7.54  
7.53  
7.52  
7.51  
7.50  
7.49

**CDCl<sub>3</sub>, <sup>1</sup>HNMR, 400 MHz**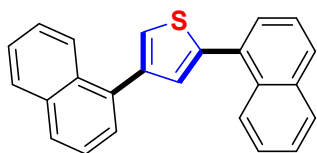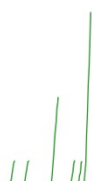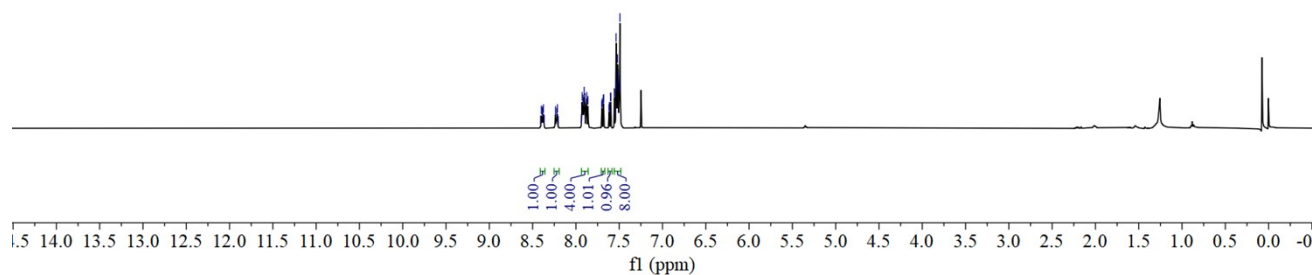

141.84  
141.45  
135.11  
134.03  
133.99  
132.45  
131.85  
129.99  
128.67  
128.51  
128.49  
128.33  
127.98  
127.11  
126.68  
126.35  
126.19  
126.01  
125.97  
125.82  
125.56  
125.42  
123.94  
123.84

**CDCl<sub>3</sub>, <sup>13</sup>CNMR, 101 MHz**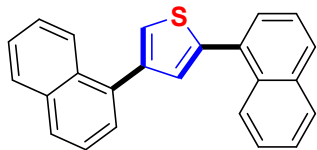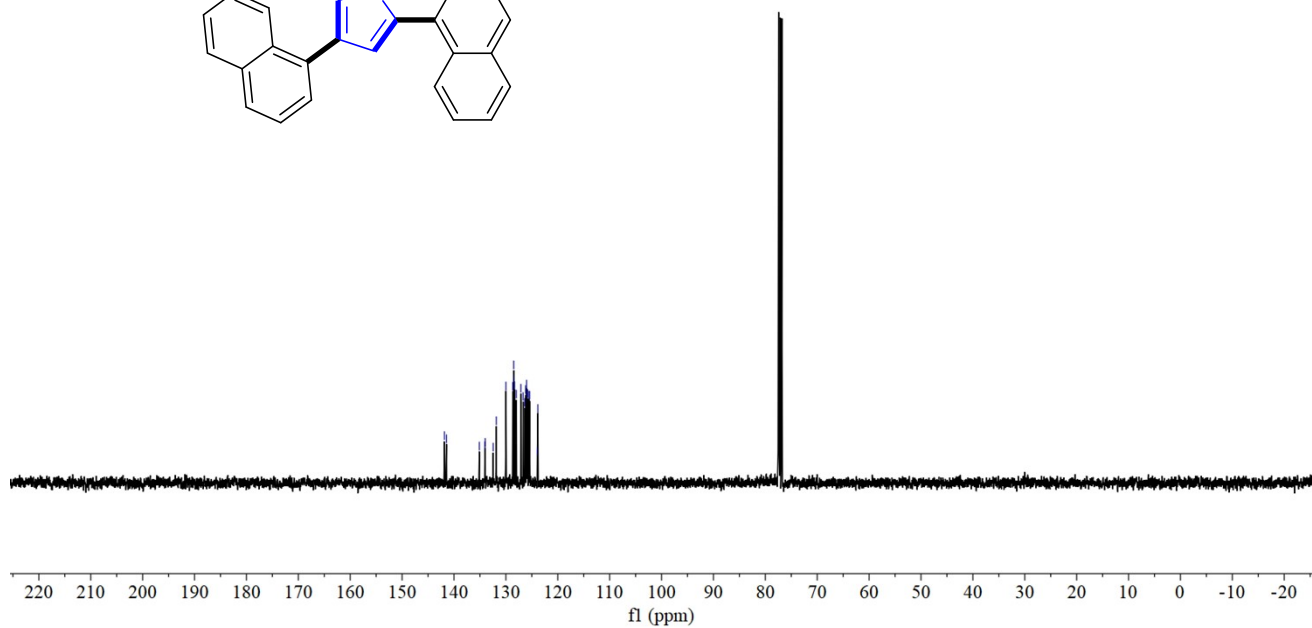



**2,4-Di-(benzofuran-2-yl)-thiophene (2t)****CDCl<sub>3</sub>, <sup>1</sup>HNMR, 400 MHz**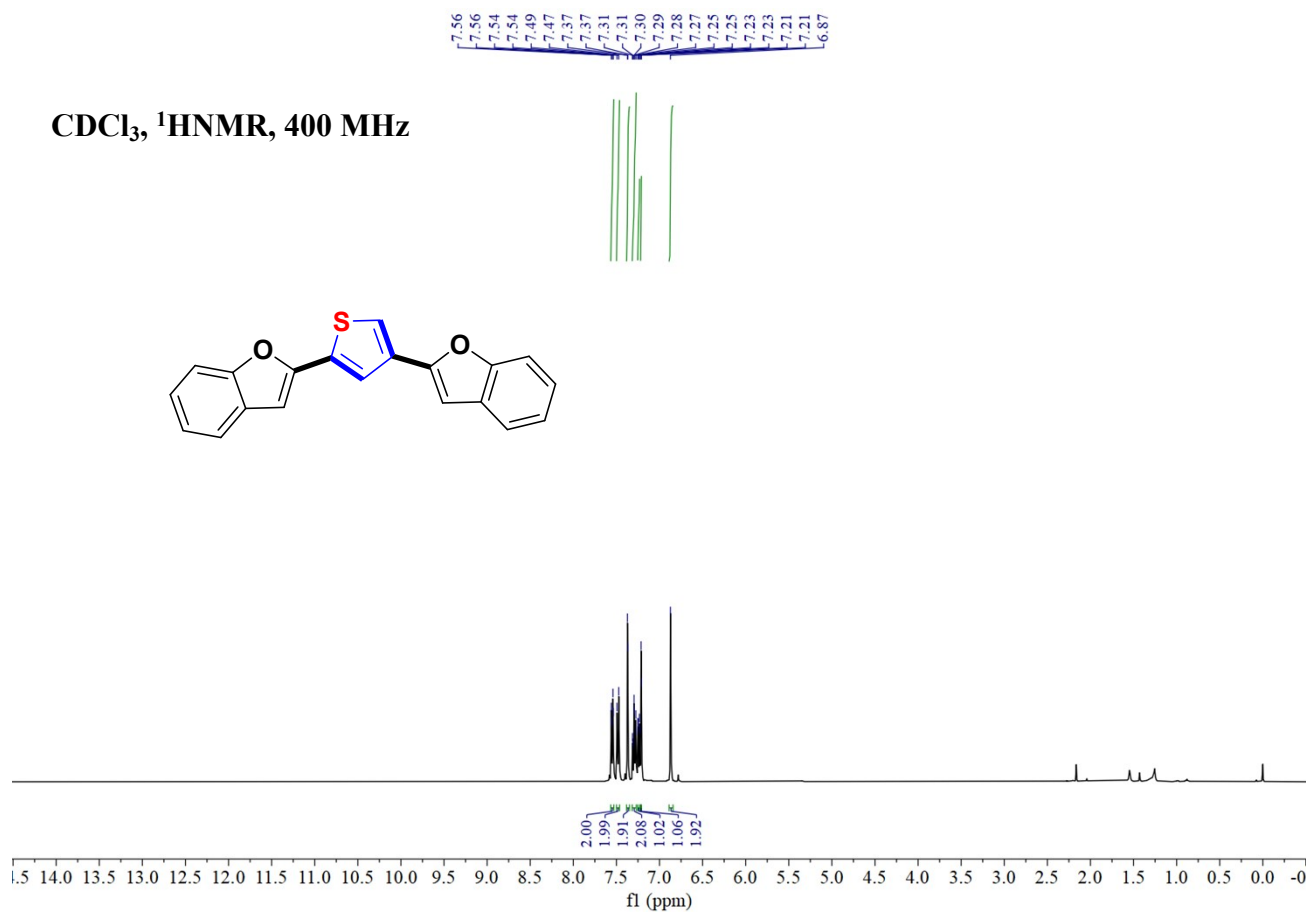**CDCl<sub>3</sub>, <sup>13</sup>CNMR, 101 MHz**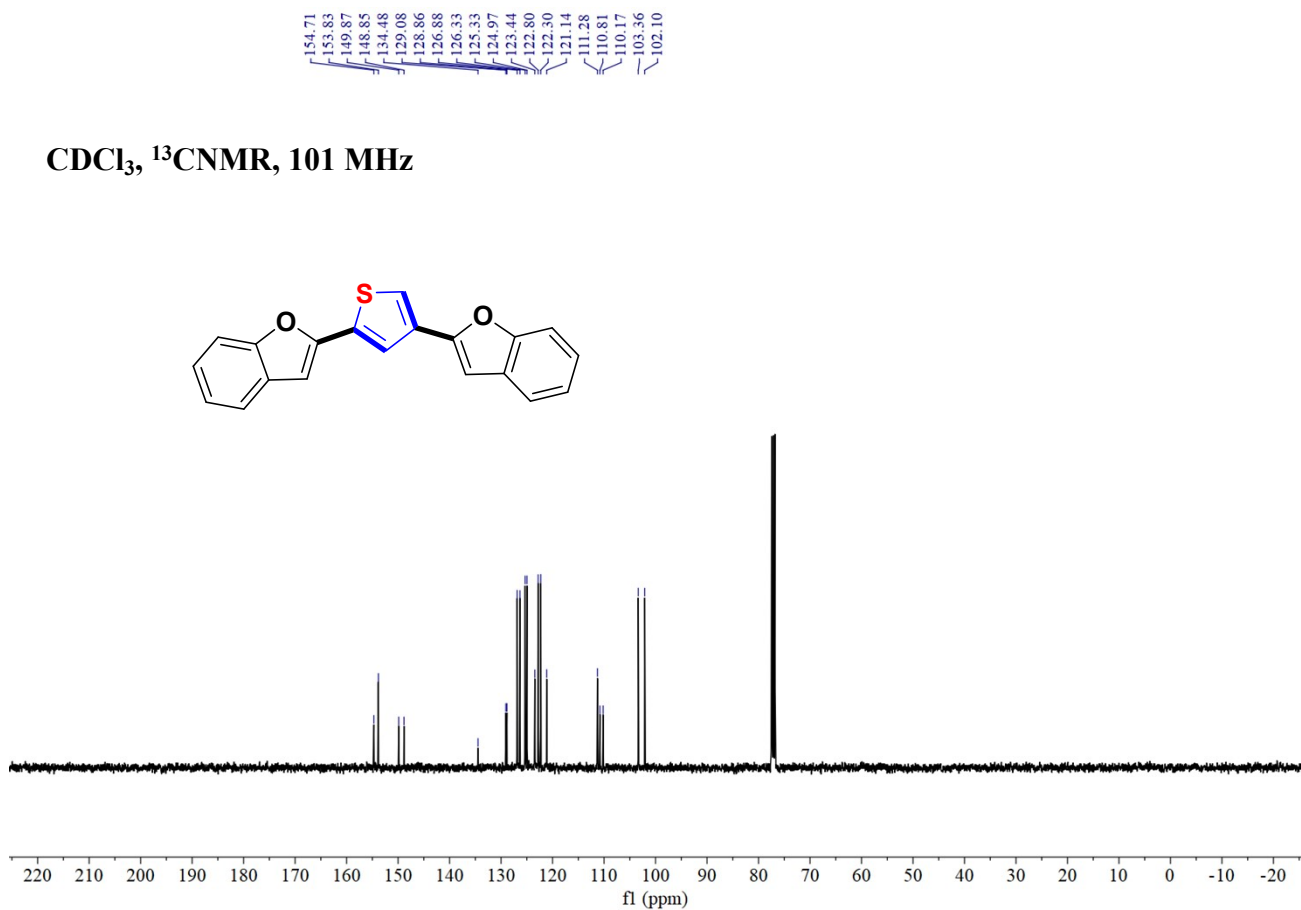

**2,4-Diphenylselenophen (3a)**

7.69  
7.67  
7.65  
7.62  
7.45  
7.44  
7.42  
7.40  
7.39  
7.37  
7.35  
7.34  
7.33  
7.31  
7.30  
7.29

**CDCl<sub>3</sub>, <sup>1</sup>HNMR, 400 MHz**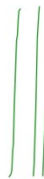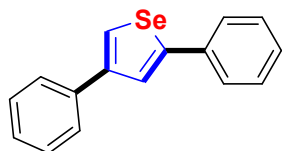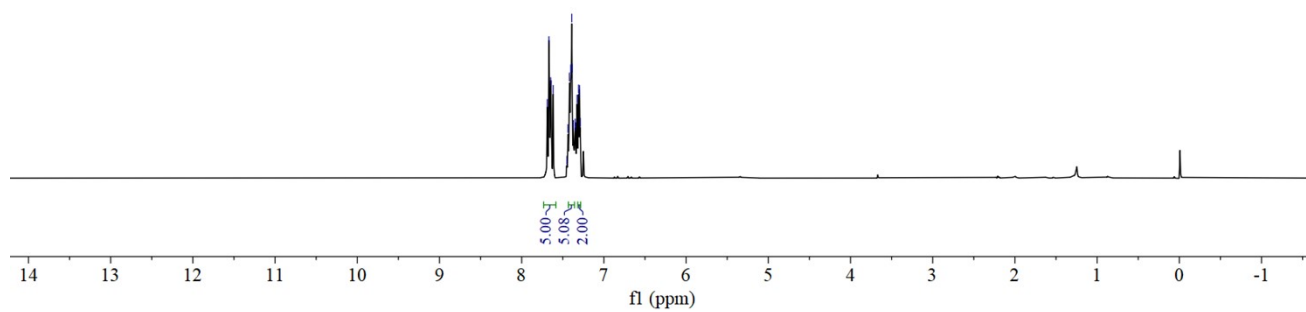**CDCl<sub>3</sub>, <sup>13</sup>CNMR, 101 MHz**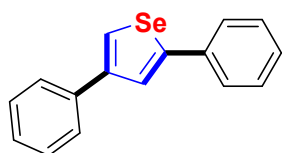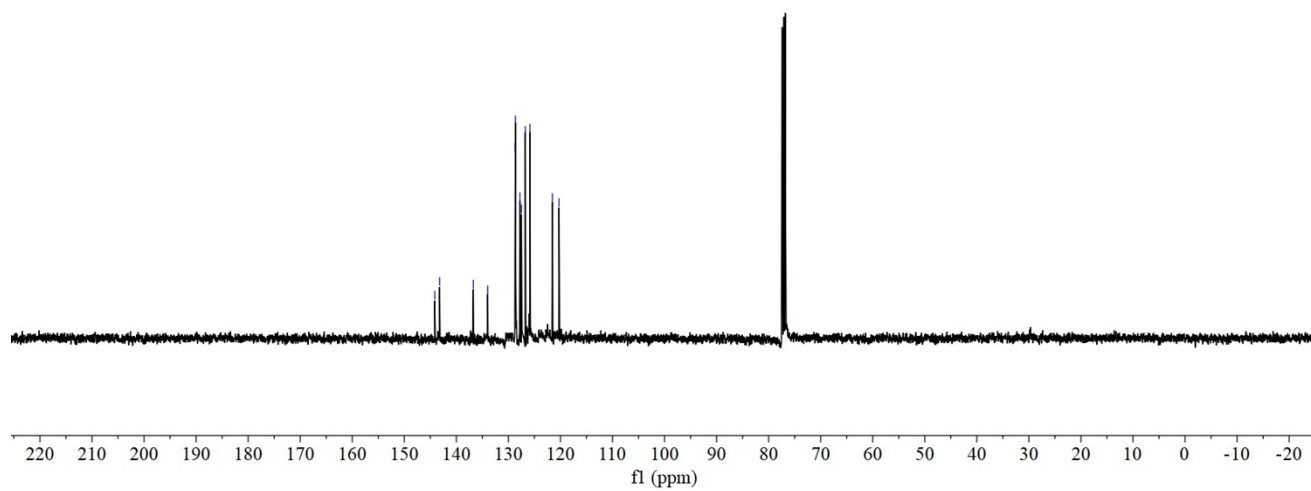

2,4-Di-*p*-tolylselenophen (3b)CDCl<sub>3</sub>, <sup>1</sup>HNMR, 400 MHz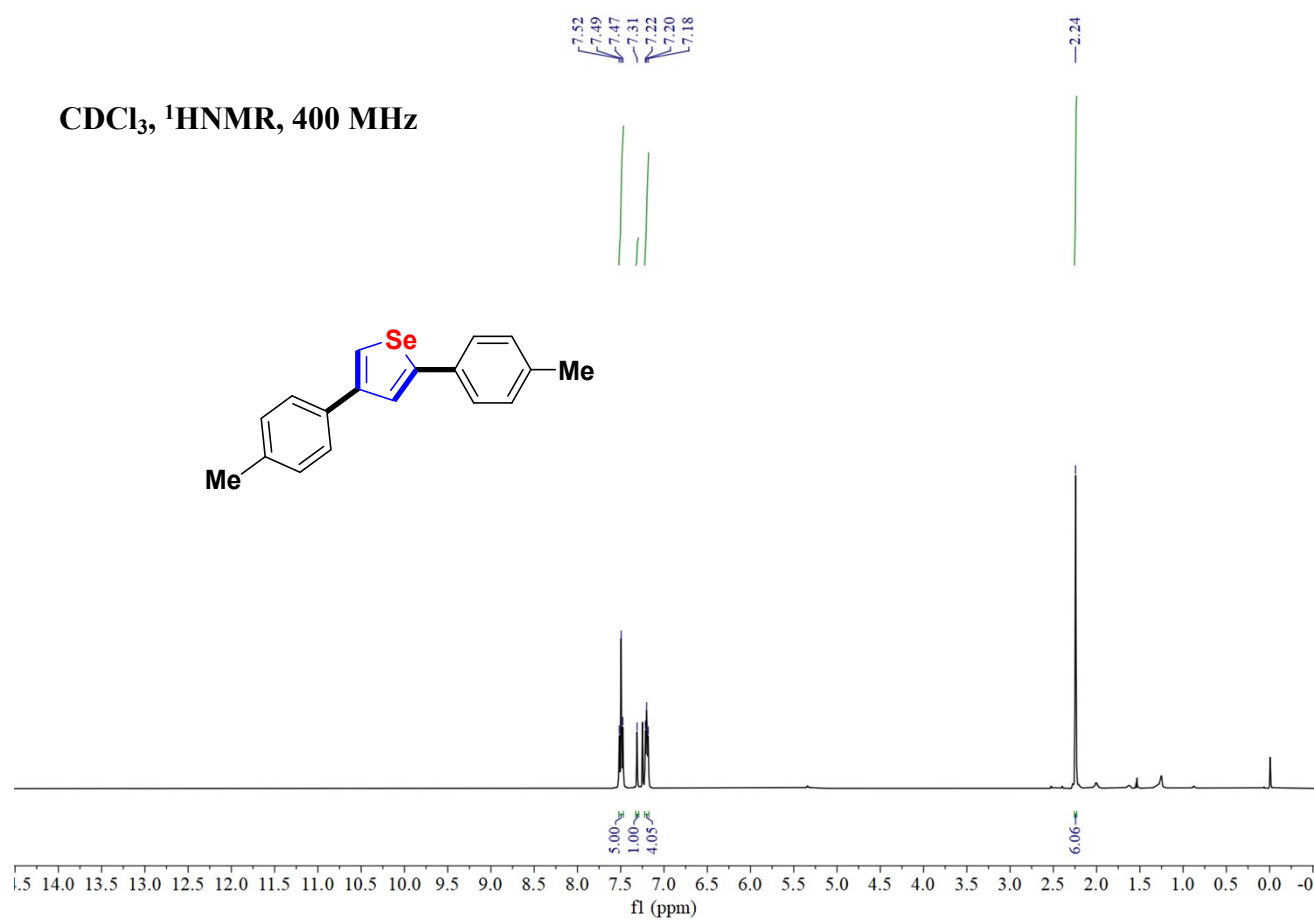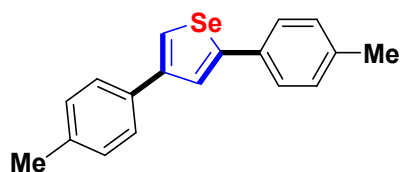CDCl<sub>3</sub>, <sup>13</sup>CNMR, 101 MHz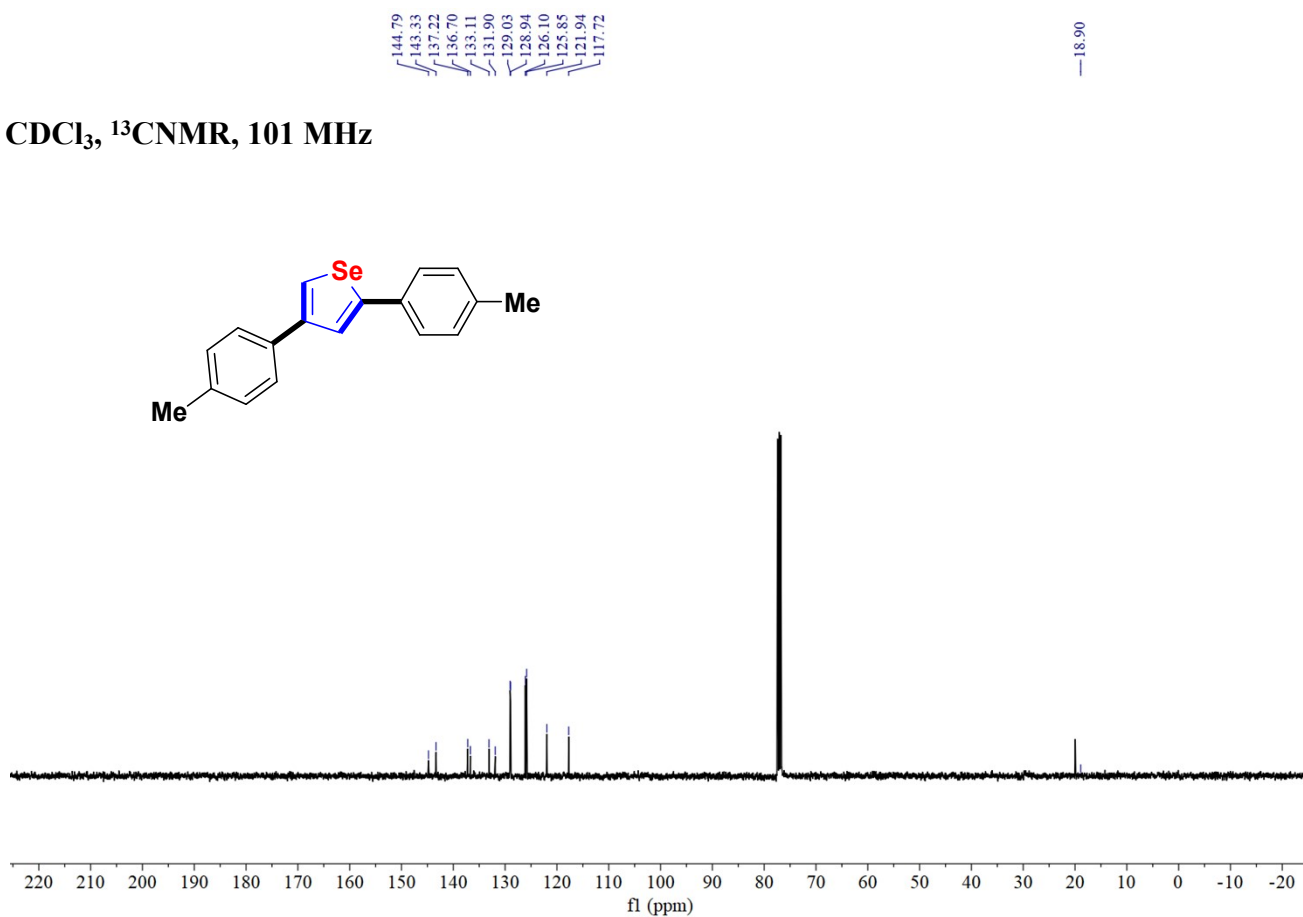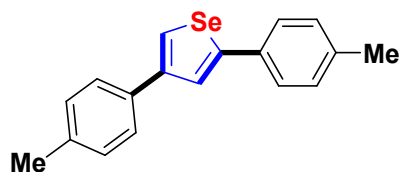

## 2,4-Di-(4-(tert-butylphenyl)-selenophen (3c)

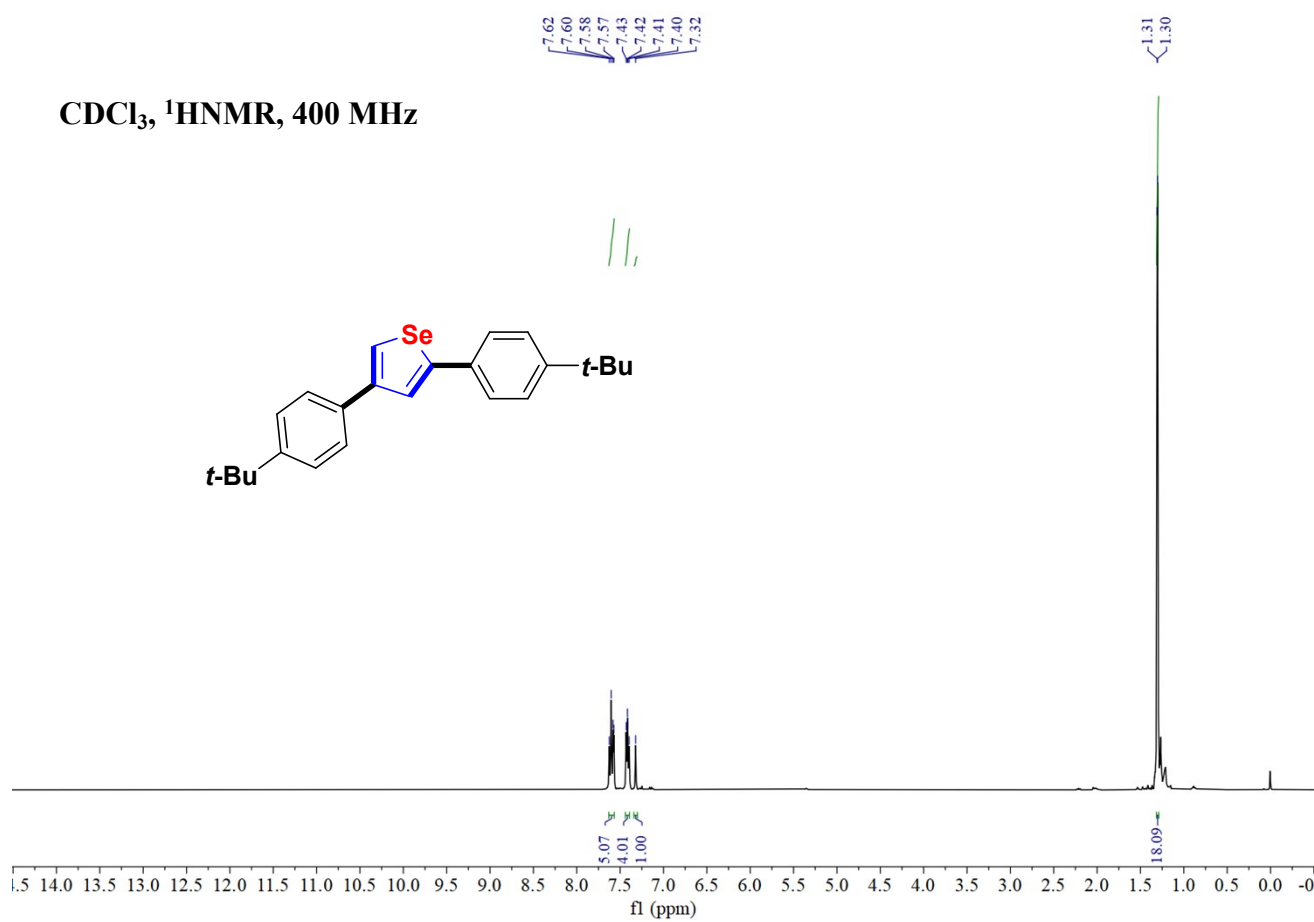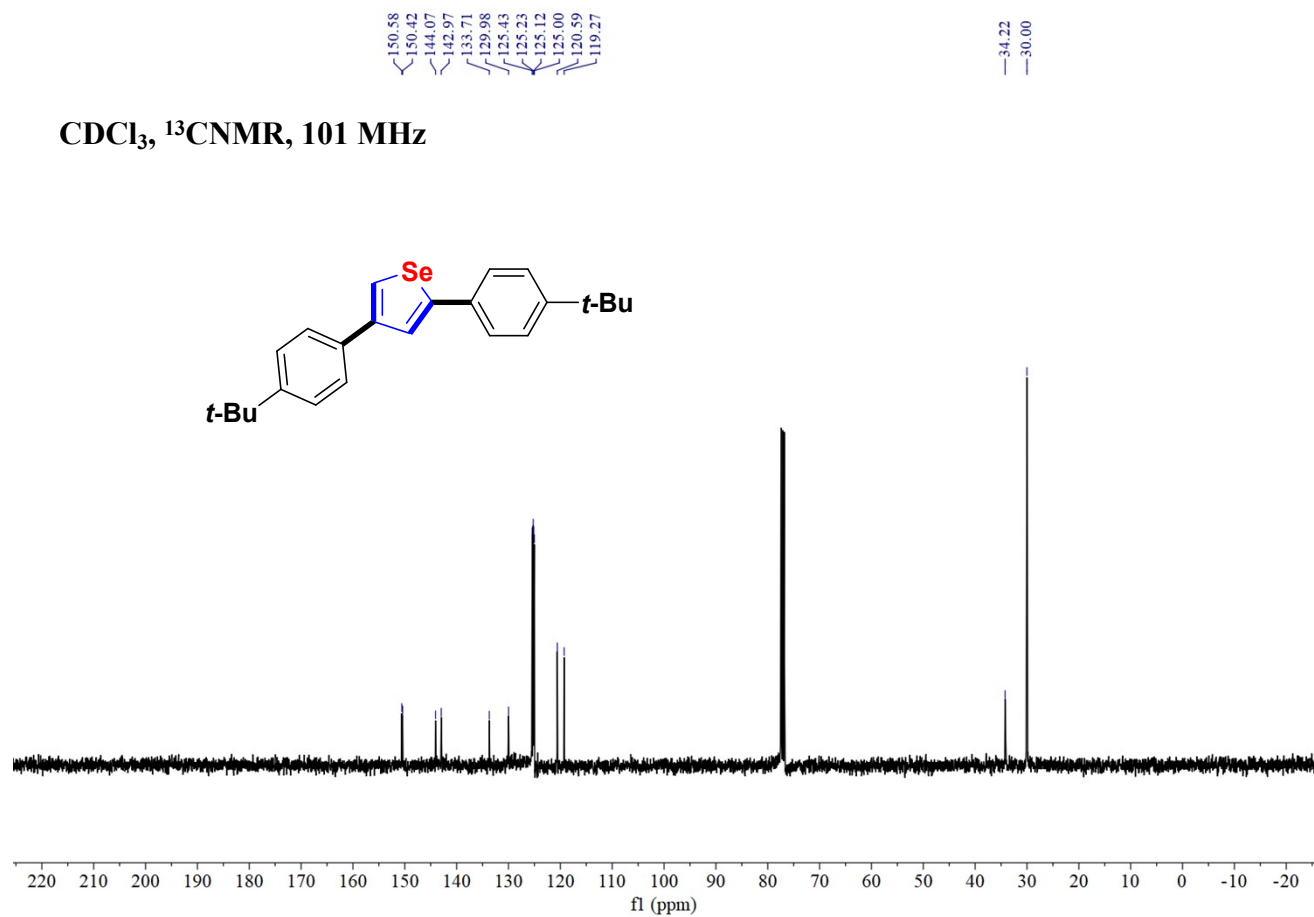

## 2,4-Di-(2-methoxyphenyl)-selenophen (3d)

CDCl<sub>3</sub>, <sup>1</sup>HNMR, 400 MHz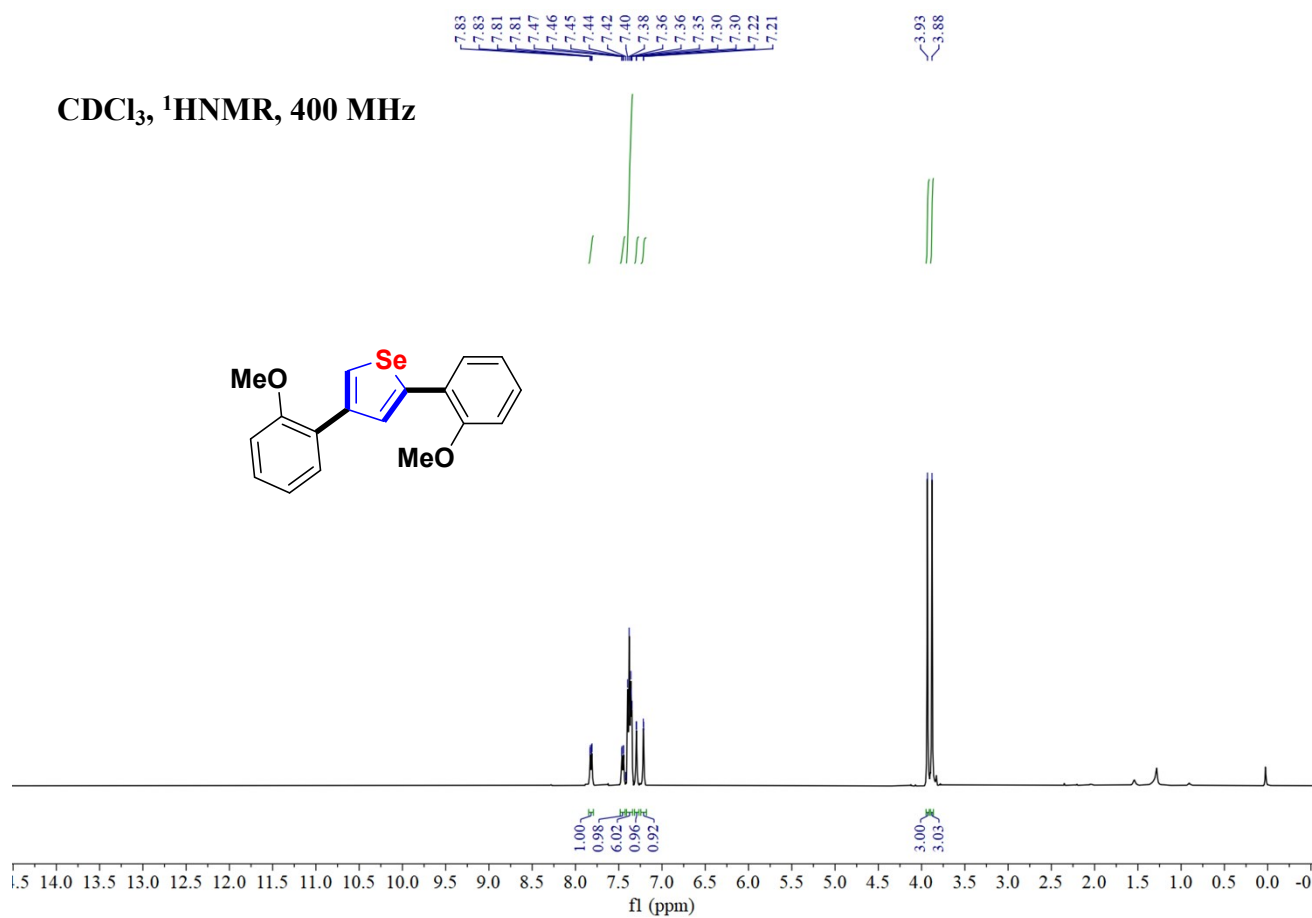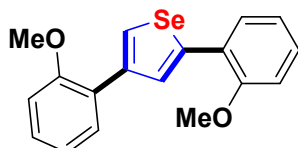CDCl<sub>3</sub>, <sup>13</sup>CNMR, 101 MHz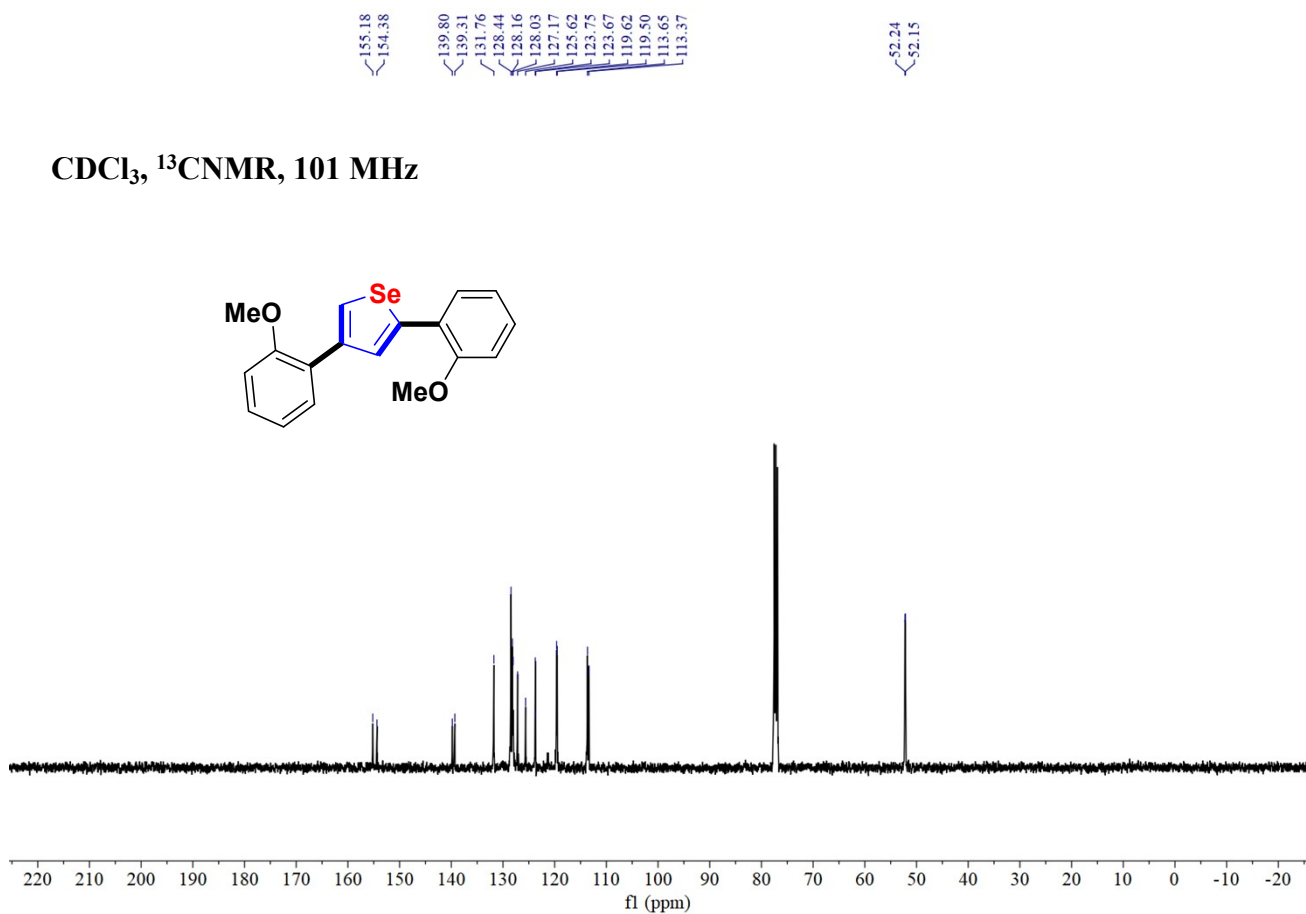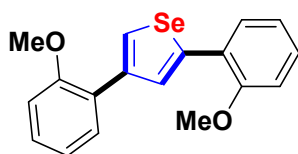

2,4-Di-(4-trifluoromethylphenyl)-selenophen (**3e**)CDCl<sub>3</sub>, <sup>1</sup>HNMR, 400 MHz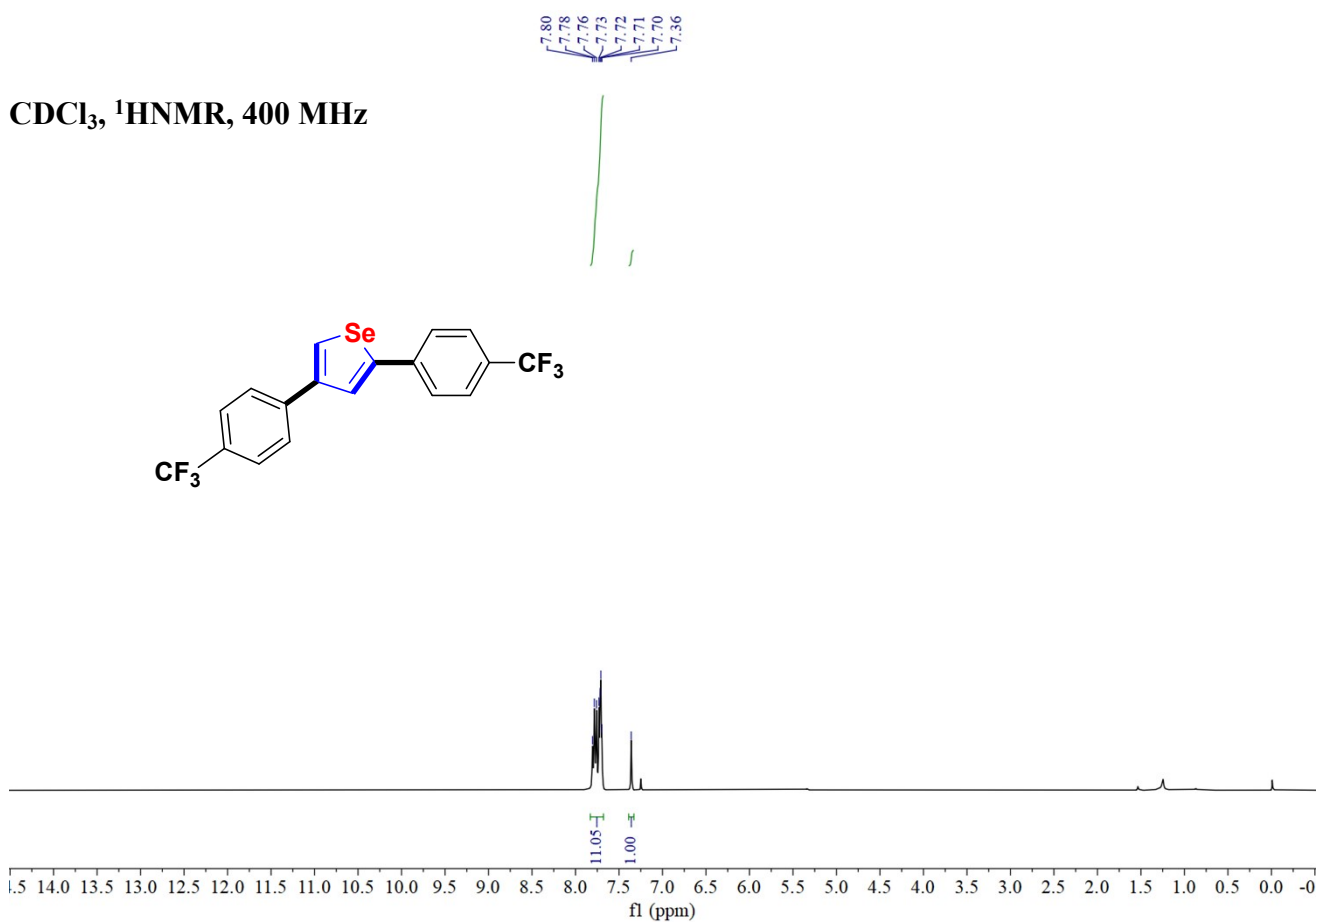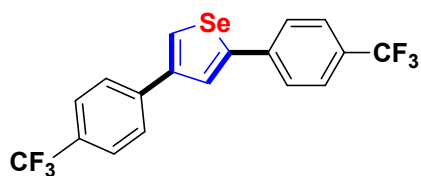CDCl<sub>3</sub>, <sup>13</sup>CNMR, 101 MHz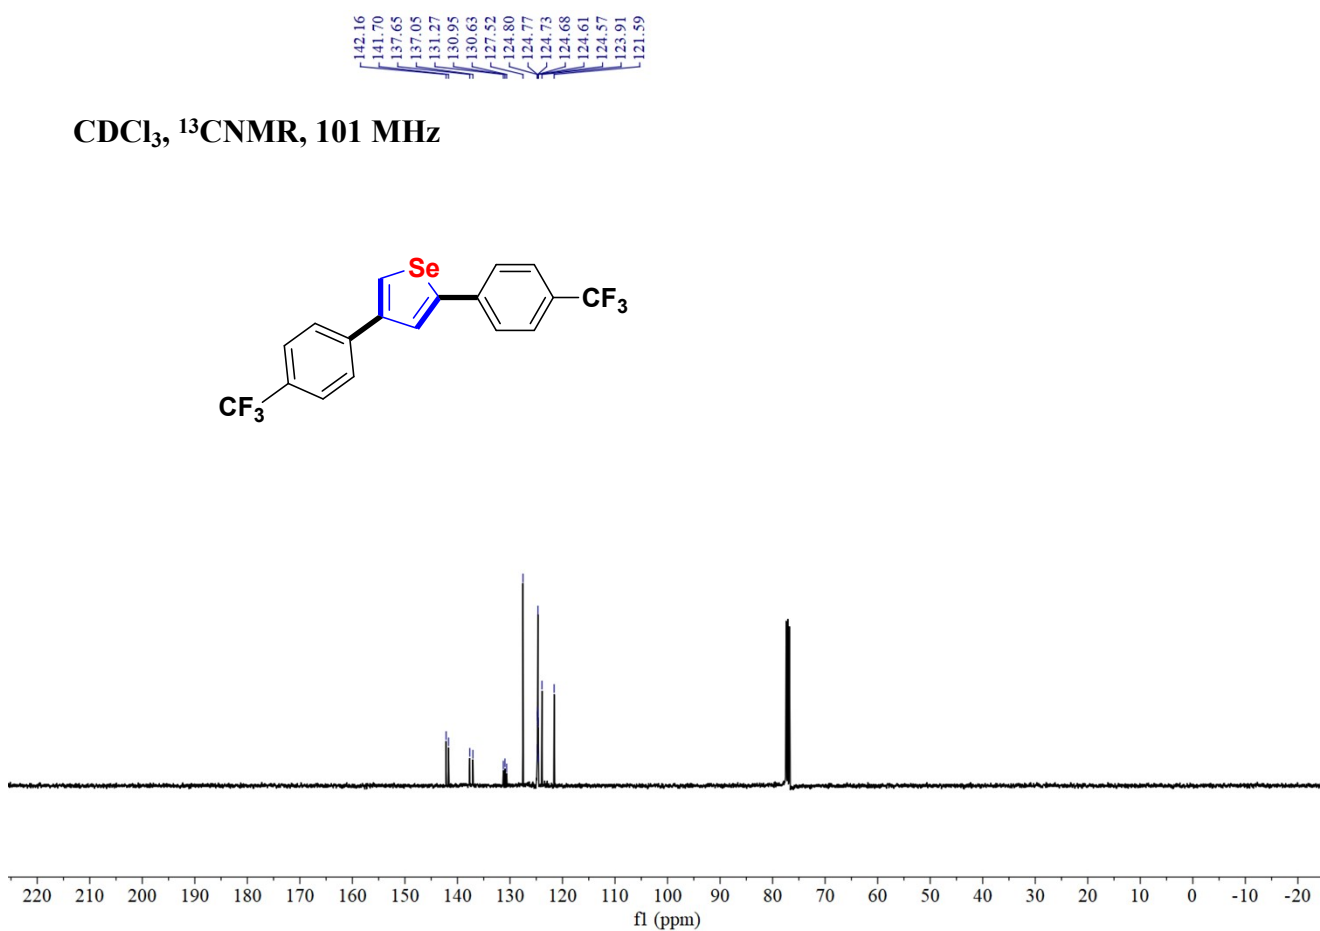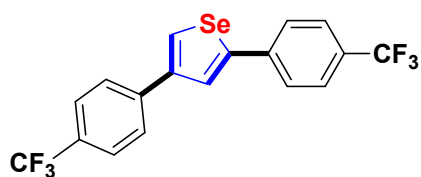

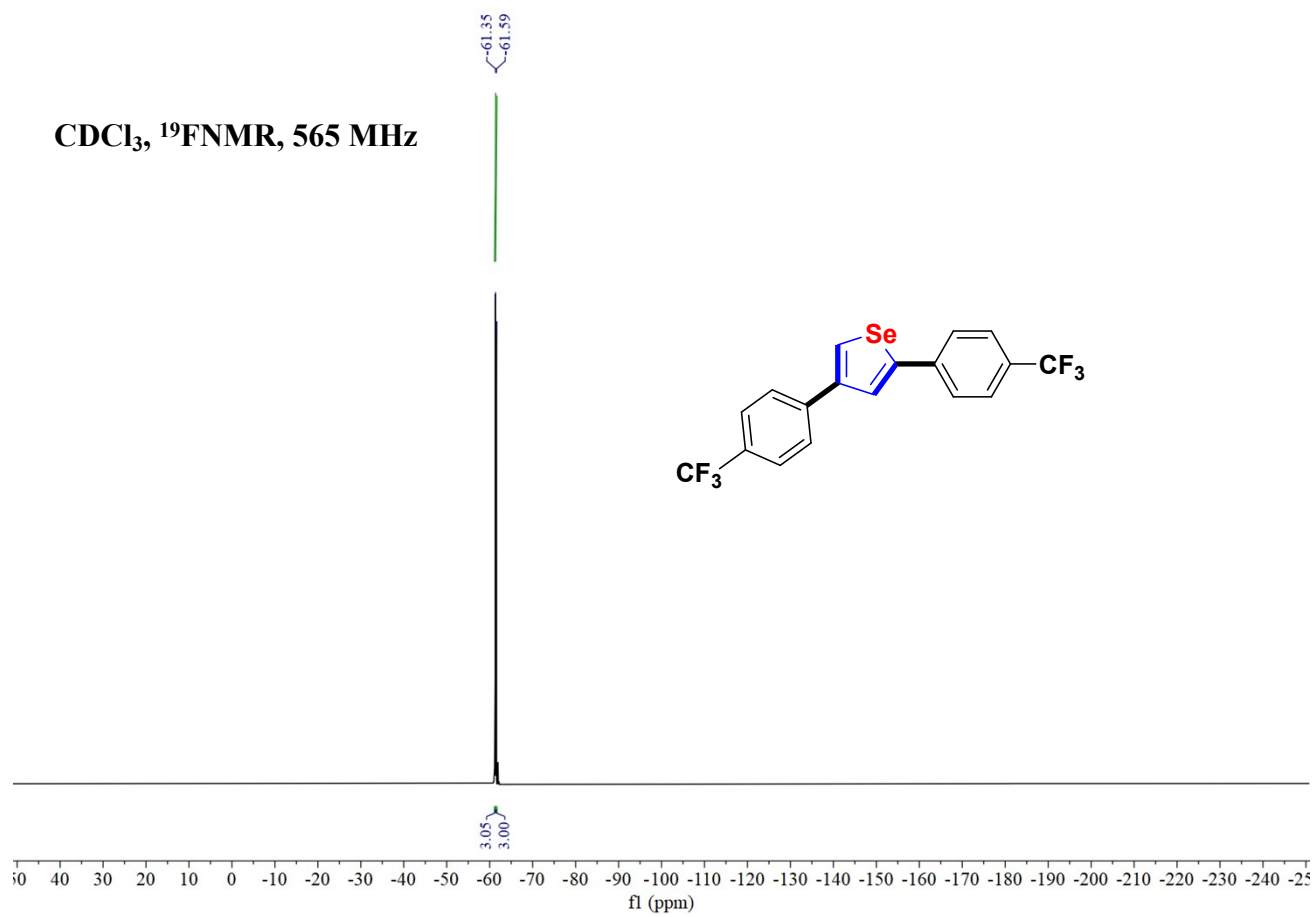

## 2,3,5-triphenylthiophene (4)

7.66  
7.66  
7.64  
7.64  
7.42  
7.41  
7.40  
7.38  
7.37  
7.34  
7.34  
7.34  
7.33  
7.32  
7.31  
7.30  
7.29  
7.28  
7.28  
7.27  
7.26  
7.26  
7.25  
7.25  
7.24  
7.24

$\text{CDCl}_3$ ,  $^1\text{H NMR}$ , 400 MHz

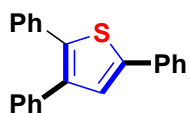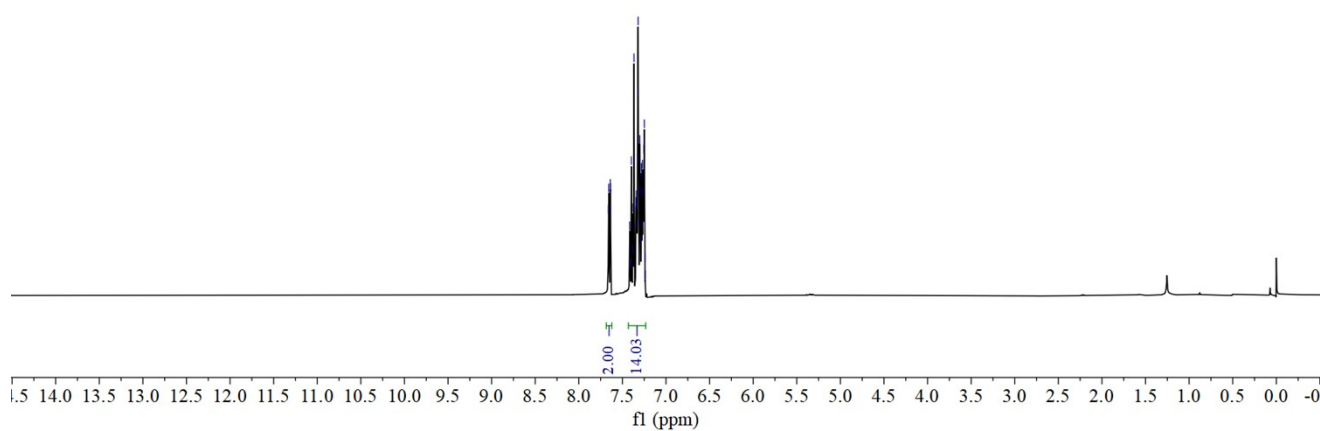

142.67  
139.10  
138.10  
136.70  
134.32  
134.21  
129.25  
129.18  
129.05  
128.57  
128.51  
127.72  
127.54  
127.11  
126.61  
125.71

$\text{CDCl}_3$ ,  $^{13}\text{C NMR}$ , 101 MHz

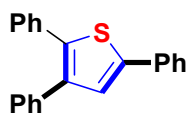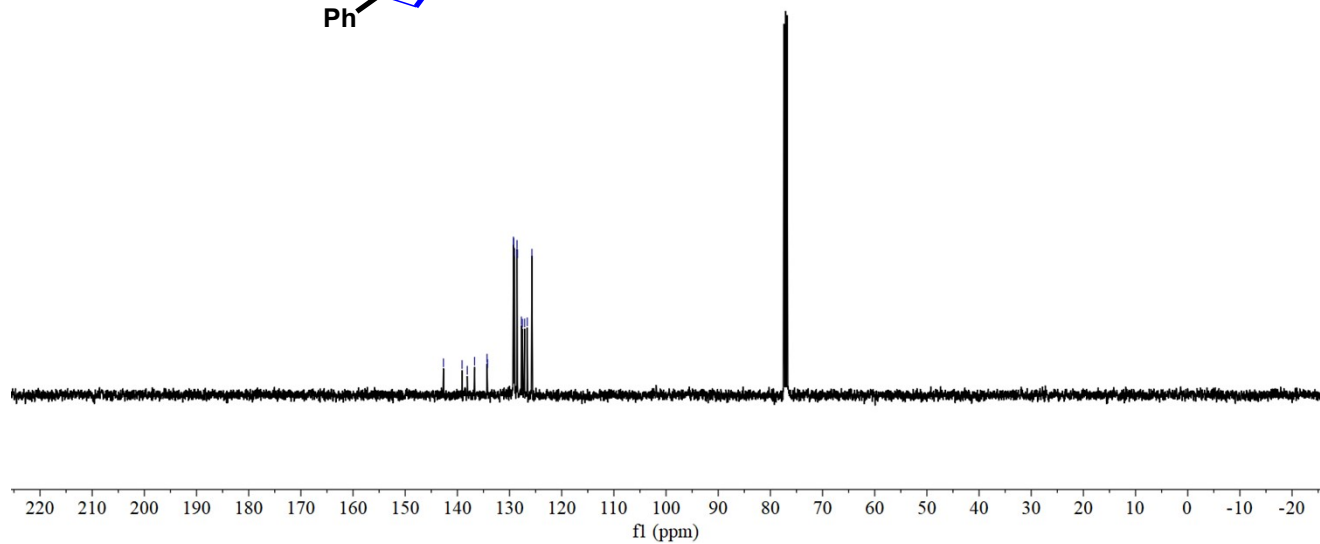



**2,4-Di-(4-(4-diphenylaminophenyl)-phenyl)-thiophene (5)**7.72  
7.70  
7.68  
7.65  
7.65  
7.63  
7.62  
7.61  
7.60  
7.52  
7.52  
7.50  
7.50  
7.45  
7.44  
7.43  
7.42  
7.39  
7.27  
7.15  
7.15  
7.13  
7.12  
7.11  
7.10  
7.06  
7.05  
7.04  
7.03  
7.02  
7.01**CDCl<sub>3</sub>, <sup>1</sup>HNMR, 400 MHz**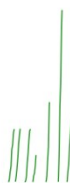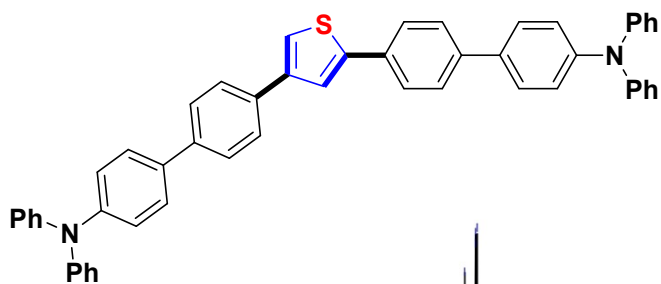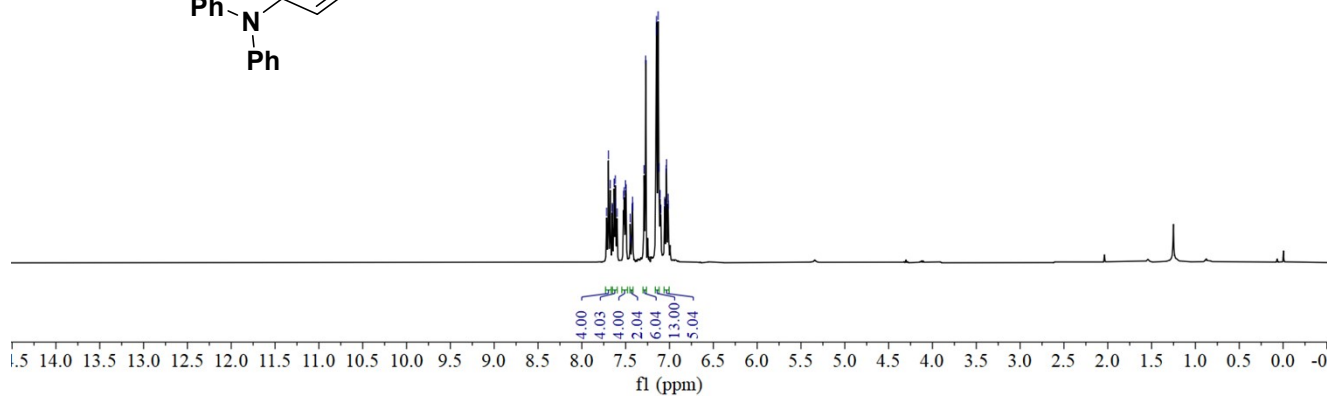147.75  
147.72  
147.38  
142.89  
139.58  
134.56  
134.40  
132.89  
129.40  
129.34  
127.67  
127.63  
127.39  
127.11  
127.07  
126.75  
126.27  
124.61  
124.56  
124.39  
124.17  
123.97  
123.90  
123.13  
123.08  
122.91  
122.16  
119.56**CDCl<sub>3</sub>, <sup>13</sup>CNMR, 101 MHz**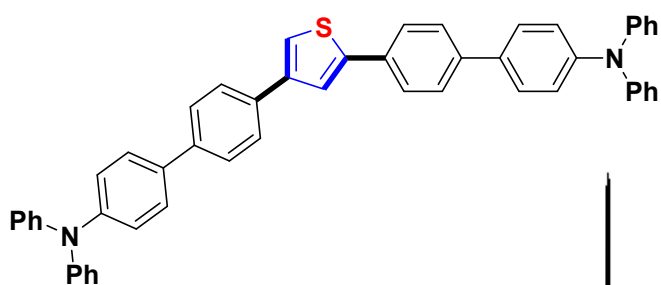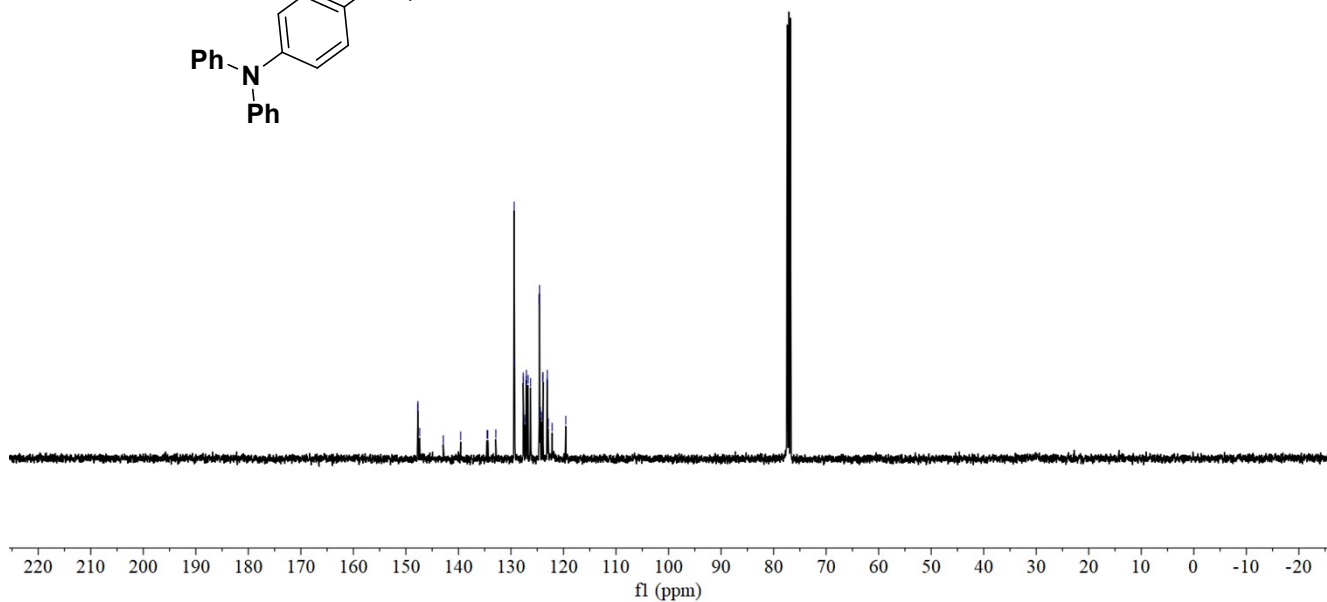

Supplement: d1nj05433c1.pdf [file d1nj05433c1.pdf]
